# Supplementary material for: Increased mTOR activity and metabolic efficiency in mouse and human cells containing the African-centric tumor-predisposing p53 variant Pro47Ser
Source: eLife. 2020 Nov 10;9:e55994. doi: 10.7554/eLife.55994 (PMC7661039; doi:10.7554/eLife.55994)
Supplement: Figure 2—figure supplement 1—source data 1. [file elife-55994-fig2-figsupp1-data1.xlsx]

## Sheet: Peak Area per microgram
	Peak area per microgram of protein
Compound	WT-1 15 minute trace	WT-2 15 minute trace	WT-3 15 minute trace	S47-1 15 minute trace	S47-2 15 minute trace	S47-3 15 minute trace
3-phosphoglycerate	640	1264	1114	993	1014	900
3-phosphoglycerate+1	7	13	13	10	16	0
3-phosphoglycerate+2	60	61	57	53	93	61
3-phosphoglycerate+3	3291	4043	3862	3675	3748	3416
acetyl-aspartate (N)	28004	32829	33688	42633	45197	41579
acetyl-carnitine	6137	6288	6300	6877	6496	4658
acetyl-carnitine +1	338	526	585	507	487	234
acetyl-carnitine +2	1061	1175	1171	1424	1522	1347
Adenine	858	1791	1447	800	781	1103
Adenosine	896	518	600	344	261	283
ADP	3570	4312	4125	2511	2797	2562
aKG	3160	4113	3940	3271	3947	3391
Alanine	71387	88621	86068	71360	73702	63560
Alanine +1	2242	2732	2951	2333	2239	2128
Alanine +2	172	135	142	174	252	251
Alanine +3	9507	11137	11849	12817	13325	12072
AMP	789	852	806	492	504	452
arachidic 20:0	2100	3091	2175	4225	2384	1913
Arachidonic acid	2945	2636	2461	2624	2177	1682
Arginine	122831	106614	102394	86556	70954	62228
Asparagine	2642	3776	3558	3108	3430	3185
Aspartate	90826	110662	100646	82378	83912	75684
Aspartate +1	4012	4966	4538	3735	3825	3391
Aspartate +2	488	509	507	534	553	505
Aspartate +3	4243	5006	4924	3967	4192	3962
Aspartate+4	16	19	27	26	13	34
ATP	25696	32976	28994	24163	26616	23318
Carbamoyl aspartate	113	156	136	74	76	66
Carnitine	42862	50823	44325	55907	58750	54783
CDP	161	184	161	125	148	115
CDP-choline	53	88	67	25	45	41
CDP-ethanolamine	320	390	332	245	284	274
Choline	281443	346417	333057	393317	395691	347606
cis-aconitate	1590	2195	1866	1855	1989	1673
cis-aconitate +1	83	125	97	107	106	105
cis-aconitate +2	257	297	333	352	385	352
cis-aconitate +3	26	37	54	60	62	62
cis-aconitate +4	0	0	0	0	0	0
cis-aconitate +5	0	0	10	0	10	0
cis-aconitate +6	0	0	0	0	0	0
Citric acid	43875	55609	49655	47001	49997	43116
Citric acid +1	3196	3821	3877	3413	3459	3179
Citric acid +2	7063	7949	8897	9079	9591	9146
Citric acid +3	1266	1585	1726	1786	1953	1799
Citric acid +4	61	40	78	111	109	125
Citric acid +5	356	415	487	489	555	571
Citric acid +6	0	0	0	0	0	0
Citrulline	5183	4706	3630	3226	2937	2445
CMP	181	195	184	145	165	135
Creatine	3616	4643	4298	3574	3875	3602
Creatinine	346	1042	623	389	759	876
CTP	2383	2826	2510	2113	2357	2041
Cystathione	56	0	34	0	0	0
Cystine	6273	4946	3408	3760	3019	2138
dCTP	0	0	0	0	0	0
DHAP	332	397	380	248	247	238
DHAP+1	0	0	0	0	0	0
DHAP+2	0	0	0	0	0	0
DHAP+3	2044	2346	2720	1639	1625	1545
dUTP	0	0	0	0	0	0
ethanolamine phosphate	16762	22016	20607	19842	22720	19800
G6P	370	492	428	397	473	414
G6P +1	0	0	0	0	0	0
G6P +2	0	0	0	0	0	0
G6P +3	0	0	0	0	0	0
G6P +4	0	0	0	0	0	0
G6P +5	0	0	0	0	0	0
G6P +6	693	791	685	548	658	544
GABA	73424	71808	70684	37768	52656	46289
GDP	224	268	233	172	171	146
GLN	972356	1038116	1011402	794465	721765	670880
GLN +1	54831	58065	57020	45002	40915	37656
GLN +2	0	0	0	270	0	0
GLN +3	0	0	0	0	0	0
GLN +4	0	0	0	0	0	0
GLN +5	0	0	0	0	0	0
GLU	298597	364271	354445	274913	280474	276757
GLU+1	16443	19574	19912	15189	15694	15479
GLU+2	3107	3143	3913	5022	4961	5579
GLU+3	0	0	0	224	327	395
GLU+4	0	0	0	0	0	0
GLU+5	0	0	0	0	0	0
Glucose	460	359	362	299	226	210
Glucose +1	0	0	0	0	0	0
Glucose +2	0	0	0	0	0	0
Glucose +3	0	0	0	0	0	0
Glucose +4	0	0	0	0	0	0
Glucose +5	317	498	444	338	264	230
Glucose +6	10170	9036	7844	6671	5303	4341
Glyceraldehyde 3-phosphate	332	397	380	248	247	238
Glyceraldehyde 3-phosphate +1	0	0	0	0	0	0
Glyceraldehyde 3-phosphate +2	0	6729	0	5555	0	0
Glyceraldehyde 3-phosphate +3	2010	2346	2471	1639	1625	1531
glycerol	245	0	0	0	0	0
Glycerol 3-phosphate	297	303	323	319	359	256
Glycerol 3-phosphate+1	168	221	219	163	148	151
Glycerol 3-phosphate+2	0	0	0	0	0	0
Glycerol 3-phosphate+3	70	94	86	68	88	92
Glycine	12275	14594	13157	13471	13964	13122
Glycine +1	179	98	227	229	231	242
Glycine +2	0	0	0	0	49	82
GSH	81217	97008	98523	67723	81221	72176
GSSG	320	446	422	298	358	372
GTP	1686	2077	1787	1487	1631	1513
guanine	0	0	0	0	0	0
guanosine	0	0	0	0	0	0
histidine	185847	156198	138785	121759	103498	83894
homocysteine	0	0	0	0	0	0
hypoxanthine	9899	9330	7879	7325	6155	4995
IMP	20	52	47	22	15	15
Isoleucine	250714	215870	193107	170504	150904	127285
Itaconate	569	952	718	0	321	521
Lactate	43607	43719	33602	29181	29175	23806
Lactate +1	1588	1617	1309	1052	974	890
Lactate +2	153	96	76	0	74	63
Lactate +3	16131	20093	18709	12251	13868	12766
Leucine	242651	204836	183644	162324	140907	114694
Linoleic acid	488	579	533	547	543	312
Linolenic acid	0	0	0	0	0	0
Lysine	33285	23929	23064	19084	16489	12712
Malate	61947	76363	72431	52991	54186	48972
Malate +1	2630	3401	3159	2342	2403	2168
Malate +2	482	490	511	508	522	501
Malate +3	2818	3538	3448	2540	2727	2511
Malate +4	41	61	66	40	25	51
Malonate	0	0	0	0	0	0
mead acid	337	315	336	395	262	235
Myristoyl-carnitine	0	0	0	0	0	0
NADH	10035	12527	11443	8307	9108	9002
nicotinamide	80200	67330	63199	47514	44354	40152
nicotinamide N-oxide	1749	2054	0	391	3810	0
Ornithine	2460	2139	2105	1623	1665	1226
Palmitic acid	52748	79173	56841	60410	72434	49345
Palmitoleic acid	0	0	0	370	0	0
Palmitoyl-carnitine	259	326	485	161	339	198
PEP	225	352	280	245	261	238
PEP+1	0	0	0	0	0	0
PEP+2	20	161	85	119	54	32
PEP+3	711	904	801	813	923	805
phenol red	9472	8093	7664	6430	5037	4516
Phosphocholine	781648	949364	873402	636266	673591	634347
phosphocreatine	17136	21911	19913	17355	19728	18189
proline	599764	726350	688257	538047	553899	531330
proline+1	33754	40645	38724	30284	31456	29866
Proline+2	812	900	876	735	785	732
Proline+3	0	0	0	0	0	0
Proline+4	0	0	0	0	0	0
Proline+5	0	0	0	0	0	0
Propionyl-carnitine	1917	805	1138	1595	654	723
Pyruvic acid	11399	10941	9067	8006	6864	5186
Pyruvic acid +1	471	357	343	278	225	197
Pyruvic acid +2	29	0	0	0	13	12
Pyruvic acid +3	2562	3232	2779	2255	2303	2114
Ribose phosphate	23	41	0	27	19	13
Ribose phosphate+1	0	0	0	0	0	0
Ribose phosphate+2	37	48	58	33	37	43
Ribose phosphate+3	25	24	24	22	30	40
Ribose phosphate+4	0	0	0	0	0	0
Ribose phosphate+5	336	420	430	301	344	330
Ribose	0	0	0	0	0	0
Ribose+1	0	0	0	0	0	0
Ribose+2	0	0	0	0	0	0
Ribose+3	0	0	0	0	0	0
Ribose+4	0	0	0	0	0	0
Ribose+5	25853	21621	16381	11948	13312	6701
S7P	348	417	386	268	308	263
S7P+1	14	0	18	0	8	0
S7P+2	0	0	0	0	0	0
S7P+3	0	0	0	0	0	0
S7P+4	0	0	0	0	0	0
S7P+5	0	0	0	0	0	0
S7P+6	0	0	0	0	0	0
S7P+7	26	45	32	13	26	38
S-Adenosyl-L-Homocysteine	0	108	0	0	0	0
S-Adenosyl-L-methionine	11596	14044	12530	9324	10247	9485
Serine	30471	34459	31449	25554	26110	24036
Serine +1	1137	1295	1294	1093	1092	1126
Serine +2	0	0	0	0	0	0
Serine +3	1838	2341	2263	2039	2277	2235
Stearic acid	369298	491892	343816	619840	354299	328971
Succinic acid	2388	1719	1385	1133	0	1023
Succinyladenosine	0	0	0	0	0	0
SuccinylCys	55	84	87	70	74	64
SuccinylGSH	0	0	0	0	0	0
taurine	114511	126244	119398	135036	129723	116879
threonine	127990	137241	127282	108693	107911	95233
tryptophan	22786	20674	19336	16476	14055	12692
Tyrosine	82075	71862	66368	57425	50877	45046
UDP	883	1052	916	731	788	674
UDP-GlcNAc	13651	17109	15123	12365	14350	12835
UDP-GlcNAc+01	2714	3434	3018	2478	2777	2562
UDP-GlcNAc+02	705	877	772	650	746	674
UDP-GlcNAc+03	148	179	162	126	138	114
UDP-GlcNAc+04	0	16	0	0	14	12
UDP-GlcNAc+05	13	36	19	30	56	38
UDP-GlcNAc+06	529	590	557	507	624	608
UDP-GlcNAc+07	60	57	54	52	76	75
UDP-GlcNAc+08	16	28	15	44	47	50
UDP-GlcNAc+09	0	0	0	0	0	0
UDP-GlcNAc+10	0	0	0	0	0	0
UDP-GlcNAc+11	0	0	0	0	0	0
UDP-GlcNAc+12	0	0	0	0	0	0
UDP-GlcNAc+13	0	0	0	0	0	0
UDP-GlcNAc+14	0	0	0	0	0	0
UDP-GlcNAc+15	0	0	0	0	0	0
UDP-GlcNAc+16	0	0	0	0	0	0
UDP-GlcNAc+17	0	0	0	0	0	0
UMP	100	107	103	61	87	55
urate	8237	6752	5991	5456	4399	4085
UTP	4825	6026	5488	4399	5194	4348
Valine	85681	81858	82085	87977	92858	83140
Betaine	179743	166785	137083	130541	109602	97431
xanthine	6895	6280	5300	4627	4350	3510

## Sheet: % Distribution of isotopologs
	Peak area per microgram of protein
Compound	WT-1 15 minute trace	WT-2 15 minute trace	WT-3 15 minute trace	S47-1 15 minute trace	S47-2 15 minute trace	S47-3 15 minute trace
3-phosphoglycerate	16.01	23.5	22.08	20.99	20.82	20.55
3-phosphoglycerate+1	0.18	0.23	0.26	0.21	0.33	0
3-phosphoglycerate+2	1.51	1.13	1.12	1.12	1.9	1.4
3-phosphoglycerate+3	82.3	75.13	76.54	77.68	76.95	78.05
acetyl-carnitine	81.4358	78.7082	78.2026	78.0767	76.3786	74.6594
acetyl-carnitine +1	4.48514	6.58405	7.26167	5.75613	5.72604	3.7506
acetyl-carnitine +2	14.0791	14.7077	14.5357	16.1671	17.8954	21.59
Alanine	85.69	86.35	85.21	82.32	82.33	81.48
Alanine +1	2.69	2.66	2.92	2.69	2.5	2.73
Alanine +2	0.21	0.13	0.14	0.2	0.28	0.32
Alanine +3	11.41	10.85	11.73	14.79	14.89	15.47
Aspartate	91.2045	91.3339	90.9655	90.8848	90.7206	90.5571
Aspartate +1	4.02872	4.09864	4.10152	4.1207	4.13536	4.05738
Aspartate +2	0.490034	0.420099	0.458235	0.589144	0.59787	0.60424
Aspartate +3	4.26068	4.13166	4.45039	4.37665	4.53214	4.7406
Aspartate+4	0.0160667	0.0156815	0.024403	0.0286849	0.0140548	0.0406815
cis-aconitate	81.31	82.7	79.06	78.15	77.96	76.34
cis-aconitate +1	4.23	4.7	4.1	4.49	4.16	4.8
cis-aconitate +2	13.16	11.19	14.12	14.81	15.07	16.04
cis-aconitate +3	1.3	1.41	2.29	2.55	2.42	2.81
cis-aconitate +4	0	0	0	0	0	0
cis-aconitate +5	0	0	0.43	0	0.39	0
cis-aconitate +6	0	0	0	0	0	0
Citric acid	78.61	80.11	76.72	75.96	76.14	74.42
Citric acid +1	5.73	5.5	5.99	5.52	5.27	5.49
Citric acid +2	12.65	11.45	13.75	14.67	14.61	15.79
Citric acid +3	2.27	2.28	2.67	2.89	2.97	3.1
Citric acid +4	0.11	0.06	0.12	0.18	0.17	0.22
Citric acid +5	0.64	0.6	0.75	0.79	0.85	0.99
Citric acid +6	0	0	0	0	0	0
DHAP	13.9731	14.4732	12.2581	13.1426	13.1944	13.3483
DHAP+1	0	0	0	0	0	0
DHAP+2	0	0	0	0	0	0
DHAP+3	86.0269	85.5268	87.7419	86.8574	86.8056	86.6517
G6P	34.78	38.37	38.45	42.01	41.82	43.19
G6P +1	0	0	0	0	0	0
G6P +2	0	0	0	0	0	0
G6P +3	0	0	0	0	0	0
G6P +4	0	0	0	0	0	0
G6P +5	0	0	0	0	0	0
G6P +6	65.22	61.63	61.55	57.99	58.18	56.81
GLN	94.662	94.703	94.6632	94.6088	94.6354	94.6854
GLN +1	5.33798	5.29703	5.33684	5.35906	5.36464	5.31462
GLN +2	0	0	0	0.0321529	0	0
GLN +3	0	0	0	0	0	0
GLN +4	0	0	0	0	0	0
GLN +5	0	0	0	0	0	0
GLU	93.855	94.1298	93.7016	93.081	93.0398	92.8061
GLU+1	5.16837	5.05804	5.26396	5.14275	5.20607	5.19064
GLU+2	0.976593	0.81217	1.03445	1.70037	1.64568	1.87083
GLU+3	0	0	0	0.0758427	0.108474	0.132457
GLU+4	0	0	0	0	0	0
GLU+5	0	0	0	0	0	0
Glucose	4.2	3.63	4.18	4.1	3.9	4.4
Glucose +1	0	0	0	0	0	0
Glucose +2	0	0	0	0	0	0
Glucose +3	0	0	0	0	0	0
Glucose +4	0	0	0	0	0	0
Glucose +5	2.9	5.03	5.14	4.63	4.56	4.82
Glucose +6	92.9	91.34	90.68	91.28	91.54	90.79
Glyceraldehyde 3-phosphate	14.17	4.19	13.33	3.33	13.18	13.44
Glyceraldehyde 3-phosphate +1	0	0	0	0	0	0
Glyceraldehyde 3-phosphate +2	0	71.04	0	74.64	0	0
Glyceraldehyde 3-phosphate +3	85.83	24.77	86.67	22.03	86.82	86.56
Glycine	98.5627	99.333	98.3039	98.3285	98.0343	97.5904
Glycine +1	1.43729	0.66703	1.69605	1.67153	1.62174	1.79979
Glycine +2	0	0	0	0	0.344004	0.609847
Lactate	70.93	66.72	62.58	68.69	66.17	63.44
Lactate +1	2.58	2.47	2.44	2.48	2.21	2.37
Lactate +2	0.25	0.15	0.14	0	0.17	0.17
Lactate +3	26.24	30.66	34.84	28.84	31.45	34.02
Malate	91.2085	91.0677	90.9766	90.7054	90.5167	90.3492
Malate +1	3.87232	4.05591	3.96785	4.00883	4.01417	3.99978
Malate +2	0.709679	0.584356	0.641839	0.86955	0.871991	0.924303
Malate +3	4.14912	4.21929	4.33084	4.34775	4.5554	4.63258
Malate +4	0.0603669	0.0727464	0.082899	0.0684685	0.041762	0.0940907
PEP	23.49	24.83	24.02	20.83	21.1	22.18
PEP+1	0	0	0	0	0	0
PEP+2	2.14	11.34	7.31	10.14	4.4	2.93
PEP+3	74.37	63.82	68.67	69.03	74.51	74.89
proline	94.5508	94.5898	94.5594	94.5491	94.4994	94.5548
proline+1	5.32121	5.29304	5.32028	5.3217	5.36664	5.31492
Proline+2	0.128009	0.117204	0.120353	0.129159	0.133927	0.130266
Proline+3	0	0	0	0	0	0
Proline+4	0	0	0	0	0	0
Proline+5	0	0	0	0	0	0
Pyruvic acid	78.8258	75.2994	74.3867	75.9655	72.9825	69.0638
Pyruvic acid +1	3.25704	2.45699	2.81401	2.63782	2.39234	2.62352
Pyruvic acid +2	0.200539	0	0	0	0.138224	0.159808
Pyruvic acid +3	17.7166	22.2436	22.7992	21.3967	24.487	28.1529
Ribose phosphate	5.46318	7.69231	0	7.04961	4.4186	3.05164
Ribose phosphate+1	0	0	0	0	0	0
Ribose phosphate+2	8.7886	9.00563	11.3281	8.61619	8.60465	10.0939
Ribose phosphate+3	5.93824	4.50281	4.6875	5.74413	6.97674	9.38967
Ribose phosphate+4	0	0	0	0	0	0
Ribose phosphate+5	79.81	78.7992	83.9844	78.5901	80	77.4648
Ribose	0	0	0	0	0	0
Ribose+1	0	0	0	0	0	0
Ribose+2	0	0	0	0	0	0
Ribose+3	0	0	0	0	0	0
Ribose+4	0	0	0	0	0	0
Ribose+5	100	100	100	100	100	100
S7P	96.1326	100	95.5446	100	97.4684	100
S7P+1	3.8674	0	4.45545	0	2.53165	0
S7P+2	0	0	0	0	0	0
S7P+3	0	0	0	0	0	0
S7P+4	0	0	0	0	0	0
S7P+5	0	0	0	0	0	0
S7P+6	0	0	0	0	0	0
S7P+7	6.75	9.81	7.34	4.67	7.58	14.4487
Serine	91.1	90.46	89.84	89.08	88.57	87.73
Serine +1	3.4	3.4	3.7	3.81	3.7	4.11
Serine +2	0	0	0	0	0	0
Serine +3	5.49	6.15	6.46	7.11	7.72	8.16
UDP-GlcNAc	76.5362	76.6326	76.6886	76.0829	76.2163	75.6424
UDP-GlcNAc+01	15.2164	15.3812	15.3043	15.2474	14.7493	15.099
UDP-GlcNAc+02	3.95268	3.92816	3.91481	3.99951	3.96218	3.97218
UDP-GlcNAc+03	0.829782	0.801756	0.821501	0.775289	0.732951	0.671853
UDP-GlcNAc+04	0	0.0716653	0	0	0.0743573	0.0707214
UDP-GlcNAc+05	0.0728863	0.161247	0.0963489	0.184593	0.297429	0.223951
UDP-GlcNAc+06	2.96591	2.64266	2.82454	3.11962	3.31421	3.58322
UDP-GlcNAc+07	0.336398	0.255308	0.273834	0.319961	0.403654	0.442008
UDP-GlcNAc+08	0.0897062	0.125414	0.0760649	0.270736	0.249628	0.294672
UDP-GlcNAc+09	0	0	0	0	0	0
UDP-GlcNAc+10	0	0	0	0	0	0
UDP-GlcNAc+11	0	0	0	0	0	0
UDP-GlcNAc+12	0	0	0	0	0	0
UDP-GlcNAc+13	0	0	0	0	0	0
UDP-GlcNAc+14	0	0	0	0	0	0
UDP-GlcNAc+15	0	0	0	0	0	0
UDP-GlcNAc+16	0	0	0	0	0	0
UDP-GlcNAc+17	0	0	0	0	0	0

## Sheet: Total metabolite abundance
	Unlabeled Metabolites
Compound	WT Mean	S47 Mean	Fold-change
dCTP	N.D.	N.D.	#DIV/0!
dUTP	N.D.	N.D.	#DIV/0!
guanine	N.D.	N.D.	#DIV/0!
guanosine	N.D.	N.D.	#DIV/0!
homocysteine	N.D.	N.D.	#DIV/0!
Linolenic acid	N.D.	N.D.	#DIV/0!
Malonate	N.D.	N.D.	#DIV/0!
Myristoyl-carnitine	N.D.	N.D.	#DIV/0!
Palmitoleic acid	N.D.	N.D.	#DIV/0!
Succinyladenosine	N.D.	N.D.	#DIV/0!
SuccinylGSH	N.D.	N.D.	#DIV/0!
acetyl-aspartate (N)	31507	43136.3	1.3691
Carnitine	46003.3	56480	1.22774
Choline	320306	378871	1.18284
arachidic 20:0	2455.33	2840.67	1.15694
nicotinamide N-oxide	1267.67	1400.33	1.10465
Stearic acid	401669	434370	1.08141
taurine	120051	127213	1.05966
Valine	83208	87991.7	1.05749
ethanolamine phosphate	19795	20787.3	1.05013
cis-aconitate	2323	2372.67	1.02138
Glycine	13510	13796.7	1.02122
Creatinine	670.333	674.667	1.00646
acetyl-carnitine	7860.33	7850.67	0.99877
PEP	1179.67	1163.67	0.986437
Citric acid	63318.7	61827	0.976442
Asparagine	3325.33	3241	0.974639
3-phosphoglycerate	4808.67	4659.67	0.969014
Palmitic acid	62920.7	60729.7	0.965178
aKG	3737.67	3536.33	0.946134
phosphocreatine	19653.3	18424	0.937449
SuccinylCys	75.3333	69.3333	0.920354
mead acid	329.333	297.333	0.902834
Alanine	95648.3	84738.7	0.88594
Creatine	4185.67	3683.67	0.880067
G6P	1152.33	1011	0.87735
Linoleic acid	533.333	467.333	0.87625
UDP-GlcNAc	19960.7	17349.3	0.869176
GSSG	396	342.667	0.86532
UTP	5446.33	4647	0.853235
ATP	29222	24699	0.845219
Ribose phosphate	488.667	413	0.845157
CTP	2573	2170.33	0.843503
GTP	1850	1543.67	0.834414
GLU	361135	298338	0.826112
Arachidonic acid	2680.67	2161	0.806143
proline	710027	572378	0.806135
Aspartate	110463	88903.7	0.804828
Serine	35516	28521	0.803047
GSH	92249.3	73706.7	0.798994
CMP	186.667	148.333	0.794643
threonine	130838	103946	0.794463
NADH	11335	8805.67	0.776856
CDP-ethanolamine	347.333	267.667	0.770633
Propionyl-carnitine	1286.67	990.667	0.769948
UDP	950.333	731	0.769204
CDP	168.667	129.333	0.766798
S-Adenosyl-L-methionine	12723.3	9685.33	0.761226
Glyceraldehyde 3-phosphate	4888.33	3694.33	0.755745
Phosphocholine	868138	648068	0.746503
Malate	77128.7	57495.7	0.745451
GLN	1063930	770318	0.72403
S7P	394.333	282.333	0.715976
Betaine	161204	112525	0.698028
Tyrosine	73435	51116	0.696071
tryptophan	20932	14407.7	0.688308
Lactate	60233.3	41366	0.686763
hypoxanthine	9036	6158.33	0.681533
Isoleucine	219897	149564	0.680156
xanthine	6158.33	4162.33	0.675886
GDP	241.667	163	0.674483
DHAP	2739.67	1847.33	0.674291
Ornithine	2234.67	1504.67	0.673329
Pyruvic acid	13726.7	9151	0.666659
urate	6993.33	4646.67	0.664442
Leucine	210377	139308	0.662184
Arginine	110613	73246	0.662183
ADP	4002.33	2623.33	0.655451
Adenine	1365.33	894.667	0.655273
UMP	103.333	67.6667	0.654839
Palmitoyl-carnitine	356.667	232.667	0.652336
histidine	160277	103050	0.642953
Citrulline	4506.33	2869.33	0.636733
phenol red	8409.67	5327.67	0.633517
GABA	71972	45571	0.633177
nicotinamide	70243	44006.7	0.626492
Cystine	4875.67	2972.33	0.609626
Glucose	9829.67	5961.33	0.606463
Lysine	26759.3	16095	0.601472
AMP	815.667	482.667	0.591745
CDP-choline	69.3333	37	0.533654
Carbamoyl aspartate	135	72	0.533333
Ribose	21285	10653.7	0.500525
Adenosine	671.333	296	0.440914
IMP	39.6667	17.3333	0.436975
Succinic acid	1830.67	718.667	0.392571
Itaconate	746.333	280.667	0.376061
Cystathione	30	N.D.	0
glycerol	81.6667	N.D.	0
S-Adenosyl-L-Homocysteine	36	N.D.	0
