# Supplementary material for: Increased mTOR activity and metabolic efficiency in mouse and human cells containing the African-centric tumor-predisposing p53 variant Pro47Ser
Source: eLife. 2020 Nov 10;9:e55994. doi: 10.7554/eLife.55994 (PMC7661039; doi:10.7554/eLife.55994)
Supplement: Figure 6—source data 1. [file elife-55994-fig6-data1.xls]

## Sheet: Mice list
			Murphy mice list for Vo2 Max and serum vettest 8-9-2018
		Group	ID
		P47	1- no Tag
			2-P1183				VetTest list
			3-P1184				1	Albumin	ALB
			4-P1185				2	calcium	Ca
			5-P1186				3	Creatine Kinase	CK
			6-P1187				4	Creatinine	Crea
			7-P1188				5	Lactate	LAC
							6	Lactate dehydrogenase	LDH
		S47	1- S1190				7	magnesium	Mg
			2- S1191				8	inorganic phosphate	Phosphate
			3- S1192				9	total protein	TP
			4- S1193				10	Urea	BUN
			5- S1194
			6- S1195
			7- S1196
			8- S1199

## Sheet: 15 mice VetTest Table
				Befere Treadmill VetTest												After Treadmill VetTest
		Mice ID	Serum ID		ALB (g/dl)	Ca (mg/dl)	CK (U/L)	CREA (mg/dl)	LAC (mmol/L)	LDH (U/L)	Mg (mg/dl)	PHOS (mg/dl)	TP (g/dl)	BUN (mg/dl)		Mice ID	Serum ID		ALB (g/dl)	Ca (mg/dl)	CK (U/L)	CREA (mg/dl)	LAC (mmol/L)	LDH (U/L)	Mg (mg/dl)	PHOS (mg/dl)	TP (g/dl)	BUN (mg/dl)
				Reference range	(2.5--4.8)	(5.9-9.4)	(68-1070)	(0.2-0.8)		(1105-3993)		(6.1-10.1)	(3.6-6.6)	(18-29)				Reference range	(2.5--4.8)	(5.9-9.4)	(68-1070)	(0.2-0.8)		(1105-3993)		(6.1-10.1)	(3.6-6.6)	(18-29)
		1- no Tag	P1		0.4	5.2	488	0	4.32	4000	3.32	6.4	3.2	16		1- no Tag	P1a		3.2	11.8	516	0	13.14	3885	3.06	8	3.4	22
		2-P1183	P2		0.8	4	572	0	4.36	3648	3.52	6.8	2.8	16		2-P1183	P2a		2.2	9.2	360	0	10.7	2994	3.38	8.4	4.8	42
		3-P1184	P3		0	3.2	380	0	3.56	3464	2.8	5.6	2	12		3-P1184	P3a		1.2	7.6	220	0	12.36	3335	2.94	9.4	4	24
		4-P1185	P4		0.8	5.2	296	0	4.16	2040	3.4	6.4	3.2	24		4-P1185	P4a		1.8	9.4	186	0	9.44	2090	3.12	9.6	4.4	32
		5-P1186	P5		0.5	2.5	1025	0	4.25	6000	3.35	7.5	3	20		5-P1186	P5a		2	9.2	422	0.2	12.3	3204	3.16	11.2	5	32
		6-P1187	P6		0	2.5	315	0	3.9	2410	3.25	6.5	1.5	20		6-P1187	P6a		1.8	9	508	0.2	11.74	2528	3.4	11.2	5	52
		7-P1188	P7		1.2	6	396	0	4.36	2824	3.04	6.8	3.2	20		7-P1188	P7a		2	9.2	276	0	17.06	1754	3.18	10.8	4.8	36
		1- S1190	S1		0.4	4	200	0	3.04	1980	2.76	6	1.6	12		1- S1190	S1a		1.8	9.2	448	0	16.14	3496	3.12	9.8	4.8	32
		2- S1191	S2		0	5.6	440	0	3.2	4364	3.88	6.4	1.6	16		2- S1191	S2a		1.6	9	190	0	17.58	1468	3.16	10.6	4.8	30
		3- S1192	S3		1.5	7.2	186	0	4.2	1275	2.73	6.3	3.9	15		3- S1192	S3a		2	8.8	372	0	8.12	3080	2.98	9	4.8	32
		4- S1193	S4		1.2	6	420	0	3.75	3003	2.55	6	3.6	21		4- S1193	S4a		2	8.2	214	0	15.72	1242	2.78	10	4.8	32
		5- S1194	S5		0.6	6.3	258	0.6	4.77	1902	2.7	6.6	3	15		5- S1194	S5a		2	8.8	480	0	11.88	1888	2.98	9.8	4.8	32
		6- S1195	S6		0	4.8	208	0.4	4.4	1784	2.68	6	2	12		6- S1195	S6a		1.8	8.6	296	0	14.26	1156	2.78	9.2	4	42
		7- S1196	S7		0.8	6.4	352	0	3.64	2024	2.6	6.8	2.8	24		7- S1196	S7a		2	9	446	0	15.64	1206	3.18	12.4	4.8	40
		8- S1199	S8		1.2	6.6	222	0	4.53	1404	2.55	6	3	21		8- S1199	S8a		2.2	9.2	364	0	13.54	1290	3.1	10.6	4.6	36

## Sheet: 1- no Tag
	Subject ID	1- no Tag
	Weight(g)	23.45
	Sex	Male
	Genotype
	Diet	Chow
===============	===============	===============	===============	===============	===============	===============	===============	===============	===============	===============	===============	===============	===============	===============	===============	===============	===============	===============	===============	===============	===============	===============
	DATE/TIME	VO2	O2IN	O2OUT	DO2	ACCO2	VCO2	CO2IN	CO2OUT	DCO2	ACCCO2	RER	HEAT	FLOW	STATUS1	FEED1	FEED1 ACC	DRINK1	DRINK1 ACC	XTOT	XAMB	ZTOT
===============		ml/hr	%	%		l	ml/hr	%	%		l		kcal/hr	LPM		GRAMS	GRAMS	ml	ml	COUNTS	COUNTS	COUNTS
Basal	2018-08-15 09:19:19	82	20.87	20.65	0.22	0	69	0.043	0.236	0.193	0	0.846	0.4	0.6	OVERLOAD	0	0	0	0	0	0	0
	2018-08-15 09:19:34	85	20.87	20.64	0.23	0	70	0.043	0.238	0.195	0	0.824	0.4	0.6	OVERLOAD	0	0	0	0	0	0	0
	2018-08-15 09:19:49	86	20.87	20.64	0.23	0	72	0.043	0.243	0.2	0	0.833	0.4	0.6	OVERLOAD	0	0	0	0	0	0	0
	2018-08-15 09:20:04	81	20.87	20.65	0.22	0	68	0.043	0.234	0.191	0	0.842	0.4	0.6	OVERLOAD	0	0	0	0	0	0	0
	2018-08-15 09:20:19	76	20.87	20.66	0.2	0	63	0.043	0.22	0.177	0	0.835	0.4	0.6	OVERLOAD	0	0	0	0	0	0	0
	2018-08-15 09:20:34	73	20.87	20.67	0.2	0	63	0.043	0.218	0.175	0	0.86	0.4	0.6	OVERLOAD	0	0	0	0	0	0	0
	2018-08-15 09:20:49	77	20.87	20.66	0.21	0	67	0.043	0.231	0.188	0	0.874	0.4	0.6	OVERLOAD	0	0	0	0	0	0	0
	2018-08-15 09:21:04	83	20.87	20.65	0.22	0	71	0.043	0.241	0.198	0	0.858	0.4	0.6	OVERLOAD	0	0	0	0	0	0	0
	2018-08-15 09:21:19	82	20.87	20.65	0.22	0	72	0.043	0.243	0.2	0	0.876	0.4	0.6	OVERLOAD	0	0	0	0	0	0	0
	2018-08-15 09:21:34	89	20.87	20.63	0.24	0	74	0.043	0.25	0.207	0	0.83	0.4	0.6	OVERLOAD	0	0	0	0	0	0	0
	2018-08-15 09:21:49	91	20.87	20.63	0.24	0	74	0.043	0.25	0.207	0	0.82	0.4	0.6	OVERLOAD	0	0	0	0	0	0	0
	2018-08-15 09:22:04	91	20.87	20.63	0.24	0	75	0.043	0.252	0.209	0	0.825	0.4	0.6	OVERLOAD	0	0	0	0	0	0	0
	2018-08-15 09:22:19	91	20.87	20.62	0.25	0	76	0.043	0.255	0.212	0	0.829	0.4	0.6	OVERLOAD	0	0	0	0	0	0	0
	2018-08-15 09:22:34	93	20.87	20.62	0.25	0	78	0.043	0.26	0.217	0	0.833	0.5	0.6	OVERLOAD	0	0	0	0	0	0	0
	2018-08-15 09:22:49	92	20.87	20.62	0.25	0	76	0.043	0.255	0.212	0	0.825	0.4	0.6	OVERLOAD	0	0	0	0	0	0	0
	2018-08-15 09:23:04	89	20.87	20.63	0.24	0	75	0.043	0.251	0.208	0	0.839	0.4	0.6	OVERLOAD	0	0	0	0	0	0	0
	2018-08-15 09:23:19	92	20.87	20.62	0.25	0	77	0.043	0.259	0.216	0	0.844	0.4	0.6	OVERLOAD	0	0	0	0	0	0	0
	2018-08-15 09:23:34	96	20.87	20.61	0.26	0	81	0.043	0.269	0.226	0	0.845	0.5	0.6	OVERLOAD	0	0	0	0	0	0	0
	2018-08-15 09:23:49	99	20.87	20.6	0.27	0	82	0.043	0.272	0.229	0	0.83	0.5	0.6	OVERLOAD	0	0	0	0	0	0	0
	2018-08-15 09:24:04	97	20.87	20.61	0.26	0	79	0.043	0.264	0.221	0	0.816	0.5	0.6	OVERLOAD	0	0	0	0	0	0	0
5 meter/min	2018-08-15 09:24:19	91	20.87	20.63	0.24	0	73	0.043	0.247	0.204	0	0.804	0.4	0.6	OVERLOAD	0	0	0	0	0	0	0
	2018-08-15 09:24:34	95	20.87	20.61	0.26	0	81	0.043	0.268	0.225	0	0.849	0.5	0.6	OVERLOAD	0	0	0	0	0	0	0
	2018-08-15 09:24:49	107	20.87	20.58	0.29	0	87	0.043	0.286	0.243	0	0.811	0.5	0.6	OVERLOAD	0	0	0	0	0	0	0
	2018-08-15 09:25:04	114	20.87	20.56	0.31	0	94	0.043	0.304	0.261	0	0.817	0.6	0.6	OVERLOAD	0	0	0	0	0	0	0
	2018-08-15 09:25:19	120	20.87	20.55	0.32	0	101	0.043	0.326	0.283	0	0.847	0.6	0.6	OVERLOAD	0	0	0	0	0	0	0
	2018-08-15 09:25:34	125	20.87	20.53	0.34	0	107	0.043	0.342	0.299	0	0.855	0.6	0.6	OVERLOAD	0	0	0	0	0	0	0
	2018-08-15 09:25:49	129	20.87	20.52	0.35	0	112	0.043	0.356	0.313	0	0.868	0.6	0.6	OVERLOAD	0	0	0	0	0	0	0
	2018-08-15 09:26:04	132	20.87	20.51	0.36	0	117	0.043	0.371	0.328	0	0.89	0.6	0.6	OVERLOAD	0	0	0	0	0	0	0
10 meter/min	2018-08-15 09:26:19	135	20.87	20.5	0.37	0	120	0.043	0.379	0.336	0	0.89	0.7	0.6	OVERLOAD	0	0	0	0	0	0	0
	2018-08-15 09:26:34	136	20.87	20.5	0.37	0	121	0.043	0.382	0.339	0	0.893	0.7	0.6	OVERLOAD	0	0	0	0	0	0	0
	2018-08-15 09:26:49	142	20.87	20.48	0.39	0	127	0.043	0.397	0.354	0	0.889	0.7	0.6	OVERLOAD	0	0	0	0	0	0	0
	2018-08-15 09:27:04	147	20.87	20.47	0.4	0	128	0.043	0.4	0.357	0	0.869	0.7	0.6	OVERLOAD	0	0	0	0	0	0	0
	2018-08-15 09:27:19	147	20.87	20.47	0.4	0	126	0.043	0.396	0.353	0	0.859	0.7	0.6	OVERLOAD	0	0	0	0	0	0	0
	2018-08-15 09:27:34	147	20.87	20.47	0.4	0	125	0.043	0.393	0.35	0	0.851	0.7	0.6	OVERLOAD	0	0	0	0	0	0	0
	2018-08-15 09:27:49	147	20.87	20.47	0.4	0	124	0.043	0.39	0.347	0	0.845	0.7	0.6	OVERLOAD	0	0	0	0	0	0	0
	2018-08-15 09:28:04	147	20.87	20.47	0.4	0	123	0.043	0.387	0.344	0	0.838	0.7	0.6	OVERLOAD	0	0	0	0	0	0	0
15 meter/min	2018-08-15 09:28:19	147	20.87	20.47	0.4	0	123	0.043	0.387	0.344	0	0.836	0.7	0.6	OVERLOAD	0	0	0	0	0	0	0
	2018-08-15 09:28:34	149	20.87	20.47	0.4	0	124	0.043	0.388	0.345	0	0.832	0.7	0.6	OVERLOAD	0	0	0	0	0	0	0
	2018-08-15 09:28:49	150	20.87	20.47	0.4	0	124	0.043	0.389	0.346	0	0.826	0.7	0.6	OVERLOAD	0	0	0	0	0	0	0
	2018-08-15 09:29:04	152	20.87	20.46	0.41	0	124	0.043	0.39	0.347	0	0.819	0.7	0.6	OVERLOAD	0	0	0	0	0	0	0
	2018-08-15 09:29:19	152	20.87	20.46	0.41	0	125	0.043	0.393	0.35	0	0.822	0.7	0.6	OVERLOAD	0	0	0	0	0	0	0
	2018-08-15 09:29:34	153	20.87	20.46	0.41	0	126	0.043	0.394	0.351	0	0.821	0.7	0.6	OVERLOAD	0	0	0	0	0	0	0
	2018-08-15 09:29:49	154	20.87	20.46	0.41	0	126	0.043	0.396	0.353	0	0.822	0.7	0.6	OVERLOAD	0	0	0	0	0	0	0
	2018-08-15 09:30:04	155	20.87	20.45	0.42	0	127	0.043	0.397	0.354	0	0.817	0.7	0.6	OVERLOAD	0	0	0	0	0	0	0
20 meter/min	2018-08-15 09:30:19	155	20.87	20.45	0.42	0	126	0.043	0.395	0.352	0	0.81	0.7	0.6	OVERLOAD	0	0	0	0	0	0	0
	2018-08-15 09:30:34	154	20.87	20.45	0.41	0	126	0.043	0.394	0.351	0	0.813	0.7	0.6	OVERLOAD	0	0	0	0	0	0	0
	2018-08-15 09:30:49	155	20.87	20.45	0.42	0	126	0.043	0.395	0.352	0	0.811	0.7	0.6	OVERLOAD	0	0	0	0	0	0	0
	2018-08-15 09:31:04	156	20.87	20.45	0.42	0	126	0.043	0.396	0.353	0	0.811	0.7	0.6	OVERLOAD	0	0	0	0	0	0	0
	2018-08-15 09:31:19	156	20.87	20.45	0.42	0	127	0.043	0.396	0.353	0	0.809	0.8	0.6	OVERLOAD	0	0	0	0	0	0	0
	2018-08-15 09:31:34	156	20.87	20.45	0.42	0	127	0.043	0.398	0.355	0	0.814	0.8	0.6	OVERLOAD	0	0	0	0	0	0	0
	2018-08-15 09:31:49	157	20.87	20.45	0.42	0	128	0.043	0.401	0.358	0	0.814	0.8	0.6	OVERLOAD	0	0	0	0	0	0	0
	2018-08-15 09:32:04	156	20.87	20.45	0.42	0	128	0.043	0.399	0.356	0	0.817	0.8	0.6	OVERLOAD	0	0	0	0	0	0	0
20 meter/min & 5 degrees	2018-08-15 09:32:19	156	20.87	20.45	0.42	0	127	0.043	0.397	0.354	0	0.811	0.8	0.6	OVERLOAD	0	0	0	0	0	0	0
	2018-08-15 09:32:34	154	20.87	20.45	0.41	0	126	0.043	0.395	0.352	0	0.817	0.7	0.6	OVERLOAD	0	0	0	0	0	0	0
	2018-08-15 09:32:49	156	20.87	20.45	0.42	0	128	0.043	0.4	0.357	0	0.82	0.8	0.6	OVERLOAD	0	0	0	0	0	0	0
	2018-08-15 09:33:04	156	20.87	20.45	0.42	0	129	0.043	0.403	0.36	0	0.826	0.8	0.6	OVERLOAD	0	0	0	0	0	0	0
	2018-08-15 09:33:19	155	20.87	20.45	0.42	0	128	0.043	0.402	0.359	0	0.828	0.8	0.6	OVERLOAD	0	0	0	0	0	0	0
	2018-08-15 09:33:34	154	20.87	20.45	0.41	0	128	0.043	0.4	0.357	0	0.831	0.7	0.6	OVERLOAD	0	0	0	0	0	0	0
	2018-08-15 09:33:49	154	20.87	20.46	0.41	0	127	0.043	0.399	0.356	0	0.83	0.7	0.6	OVERLOAD	0	0	0	0	0	0	0
	2018-08-15 09:34:04	154	20.87	20.46	0.41	0	127	0.043	0.398	0.355	0	0.827	0.7	0.6	OVERLOAD	0	0	0	0	0	0	0
20 meter/min & 10 degrees	2018-08-15 09:34:19	153	20.87	20.46	0.41	0	127	0.043	0.397	0.354	0	0.826	0.7	0.6	OVERLOAD	0	0	0	0	0	0	0
	2018-08-15 09:34:34	153	20.87	20.46	0.41	0	126	0.043	0.394	0.351	0	0.822	0.7	0.6	OVERLOAD	0	0	0	0	0	0	0
	2018-08-15 09:34:49	152	20.87	20.46	0.41	0	126	0.043	0.395	0.352	0	0.827	0.7	0.6	OVERLOAD	0	0	0	0	0	0	0
	2018-08-15 09:35:04	152	20.87	20.46	0.41	0	126	0.043	0.395	0.352	0	0.829	0.7	0.6	OVERLOAD	0	0	0	0	0	0	0
	2018-08-15 09:35:19	153	20.87	20.46	0.41	0	126	0.043	0.396	0.353	0	0.826	0.7	0.6	OVERLOAD	0	0	0	0	0	0	0
	2018-08-15 09:35:34	153	20.87	20.46	0.41	0	126	0.043	0.396	0.353	0	0.826	0.7	0.6	OVERLOAD	0	0	0	0	0	0	0
	2018-08-15 09:35:49	153	20.87	20.46	0.41	0	126	0.043	0.394	0.351	0	0.824	0.7	0.6	OVERLOAD	0	0	0	0	0	0	0
	2018-08-15 09:36:04	152	20.87	20.46	0.41	0	125	0.043	0.393	0.35	0	0.823	0.7	0.6	OVERLOAD	0	0	0	0	0	0	0
20 meter/min & 15 degrees	2018-08-15 09:36:19	152	20.87	20.46	0.41	0	125	0.043	0.392	0.349	0	0.82	0.7	0.6	OVERLOAD	0	0	0	0	0	0	0
	2018-08-15 09:36:34	153	20.87	20.46	0.41	0	125	0.043	0.392	0.349	0	0.819	0.7	0.6	OVERLOAD	0	0	0	0	0	0	0
	2018-08-15 09:36:49	152	20.87	20.46	0.41	0	126	0.043	0.394	0.351	0	0.827	0.7	0.6	OVERLOAD	0	0	0	0	0	0	0
	2018-08-15 09:37:04	154	20.87	20.45	0.42	0	128	0.043	0.401	0.358	0	0.83	0.7	0.6	OVERLOAD	0	0	0	0	0	0	0
	2018-08-15 09:37:19	154	20.87	20.45	0.42	0	129	0.043	0.404	0.361	0	0.836	0.7	0.6	OVERLOAD	0	0	0	0	0	0	0
	2018-08-15 09:37:34	155	20.87	20.45	0.42	0	130	0.043	0.405	0.362	0	0.838	0.7	0.6	OVERLOAD	0	0	0	0	0	0	0
	2018-08-15 09:37:49	155	20.87	20.45	0.42	0	130	0.043	0.405	0.362	0	0.837	0.8	0.6	OVERLOAD	0	0	0	0	0	0	0
	2018-08-15 09:38:04	154	20.87	20.45	0.42	0	129	0.043	0.403	0.36	0	0.835	0.7	0.6	OVERLOAD	0	0	0.02	0.02	0	0	0
20 meter/min & 20 degrees	2018-08-15 09:38:19	154	20.87	20.45	0.42	0	128	0.043	0.401	0.358	0	0.833	0.7	0.6	OVERLOAD	0	0	0	0.02	0	0	0
	2018-08-15 09:38:34	153	20.87	20.46	0.41	0	128	0.043	0.402	0.359	0	0.837	0.7	0.6	OVERLOAD	0	0	0	0.02	0	0	0
	2018-08-15 09:38:49	154	20.87	20.45	0.41	0	129	0.043	0.403	0.36	0	0.838	0.7	0.6	OVERLOAD	0	0	0	0.02	0	0	0
	2018-08-15 09:39:04	155	20.87	20.45	0.42	0	129	0.043	0.405	0.362	0	0.834	0.8	0.6	OVERLOAD	0	0	0	0.02	0	0	0
	2018-08-15 09:39:19	155	20.87	20.45	0.42	0	129	0.043	0.404	0.361	0	0.834	0.8	0.6	OVERLOAD	0	0	0	0.02	0	0	0
	2018-08-15 09:39:34	156	20.87	20.45	0.42	0	129	0.043	0.404	0.361	0	0.831	0.8	0.6	OVERLOAD	0	0	0	0.02	0	0	0
	2018-08-15 09:39:49	156	20.87	20.45	0.42	0	130	0.043	0.405	0.362	0	0.83	0.8	0.6	OVERLOAD	0	0	0	0.02	0	0	0
	2018-08-15 09:40:04	156	20.87	20.45	0.42	0	129	0.043	0.404	0.361	0	0.828	0.8	0.6	OVERLOAD	0	0	0	0.02	0	0	0
20 meter/min & 25 degrees	2018-08-15 09:40:19	156	20.87	20.45	0.42	0	129	0.043	0.404	0.361	0	0.828	0.8	0.6	OVERLOAD	0	0	0	0.02	0	0	0
	2018-08-15 09:40:34	156	20.87	20.45	0.42	0	129	0.043	0.403	0.36	0	0.828	0.8	0.6	OVERLOAD	0	0	0	0.02	0	0	0
	2018-08-15 09:40:49	156	20.87	20.45	0.42	0	130	0.043	0.406	0.363	0	0.832	0.8	0.6	OVERLOAD	0	0	0	0.02	0	0	0
	2018-08-15 09:41:04	157	20.87	20.45	0.42	0	131	0.043	0.41	0.367	0	0.836	0.8	0.6	OVERLOAD	0	0	0	0.02	0	0	0
	2018-08-15 09:41:19	159	20.87	20.44	0.43	0	133	0.043	0.415	0.372	0	0.837	0.8	0.6	OVERLOAD	0	0	0	0.02	0	0	0
	2018-08-15 09:41:34	160	20.87	20.44	0.43	0.1	134	0.043	0.417	0.374	0	0.839	0.8	0.6	OVERLOAD	0	0	0	0.02	0	0	0
	2018-08-15 09:41:49	160	20.87	20.44	0.43	0.1	134	0.043	0.416	0.373	0	0.837	0.8	0.6	OVERLOAD	0	0	0	0.02	0	0	0
	2018-08-15 09:42:04	154	20.87	20.45	0.42	0.1	133	0.043	0.415	0.372	0	0.865	0.8	0.6	OVERLOAD	0	0	0	0.02	0	0	0
20 meter/min & 25 degrees	2018-08-15 09:42:19	164	20.87	20.43	0.44	0.1	133	0.043	0.415	0.372	0	0.812	0.8	0.6	OVERLOAD	0	0	0	0.02	0	0	0
	2018-08-15 09:42:34	161	20.87	20.44	0.43	0.1	134	0.043	0.416	0.373	0	0.832	0.8	0.6	OVERLOAD	0	0	0	0.02	0	0	0
	2018-08-15 09:42:49	157	20.87	20.44	0.43	0.1	133	0.043	0.414	0.371	0	0.843	0.8	0.6	OVERLOAD	0	0	0	0.02	0	0	0
	2018-08-15 09:43:04	156	20.87	20.45	0.42	0.1	133	0.043	0.415	0.372	0	0.85	0.8	0.6	OVERLOAD	0	0	0	0.02	0	0	0
	2018-08-15 09:43:19	163	20.87	20.43	0.44	0.1	132	0.043	0.413	0.37	0	0.81	0.8	0.6	OVERLOAD	0	0	0	0.02	0	0	0
	2018-08-15 09:43:34	159	20.87	20.44	0.43	0.1	132	0.043	0.412	0.369	0	0.83	0.8	0.6	OVERLOAD	0	0	0	0.02	0	0	0
	2018-08-15 09:43:49	158	20.87	20.44	0.43	0.1	132	0.043	0.412	0.369	0	0.836	0.8	0.6	OVERLOAD	0	0	0	0.02	0	0	0
	2018-08-15 09:44:04	159	20.87	20.44	0.43	0.1	133	0.043	0.414	0.371	0	0.838	0.8	0.6	OVERLOAD	0	0	0	0.02	0	0	0
20 meter/min & 25 degrees	2018-08-15 09:44:19	159	20.87	20.44	0.43	0.1	133	0.043	0.414	0.371	0	0.836	0.8	0.6	OVERLOAD	0	0	0	0.02	0	0	0
	2018-08-15 09:44:34	157	20.87	20.44	0.42	0.1	133	0.043	0.414	0.371	0	0.844	0.8	0.6	OVERLOAD	0	0	0	0.02	0	0	0
	2018-08-15 09:44:49	158	20.87	20.44	0.43	0.1	132	0.043	0.413	0.37	0	0.84	0.8	0.6	OVERLOAD	0	0	0	0.02	0	0	0
	2018-08-15 09:45:04	161	20.87	20.44	0.43	0.1	132	0.043	0.412	0.369	0	0.823	0.8	0.6	OVERLOAD	0	0	0	0.02	0	0	0
	2018-08-15 09:45:19	159	20.87	20.44	0.43	0.1	132	0.043	0.412	0.369	0.1	0.834	0.8	0.6	OVERLOAD	0	0	0	0.02	0	0	0
	2018-08-15 09:45:34	160	20.87	20.44	0.43	0.1	134	0.043	0.418	0.375	0.1	0.841	0.8	0.6	OVERLOAD	0	0	0	0.02	0	0	0
	2018-08-15 09:45:49	162	20.87	20.43	0.44	0.1	138	0.043	0.428	0.385	0.1	0.851	0.8	0.6	OVERLOAD	0	0	0	0.02	0	0	0
	2018-08-15 09:46:04	163	20.87	20.43	0.44	0.1	140	0.043	0.433	0.39	0.1	0.857	0.8	0.6	OVERLOAD	0	0	0	0.02	0	0	0
20 meter/min & 25 degrees	2018-08-15 09:46:19	163	20.87	20.43	0.44	0.1	141	0.043	0.436	0.393	0.1	0.86	0.8	0.6	OVERLOAD	0	0	0	0.02	0	0	0
	2018-08-15 09:46:34	162	20.87	20.43	0.44	0.1	139	0.043	0.432	0.389	0.1	0.858	0.8	0.6	OVERLOAD	0	0	0	0.02	0	0	0
	2018-08-15 09:46:49	162	20.87	20.43	0.44	0.1	139	0.043	0.431	0.388	0.1	0.857	0.8	0.6	OVERLOAD	0	0	0	0.02	0	0	0
	2018-08-15 09:47:04	162	20.87	20.43	0.44	0.1	139	0.043	0.431	0.388	0.1	0.86	0.8	0.6	OVERLOAD	0	0	0	0.02	0	0	0
	2018-08-15 09:47:19	162	20.87	20.43	0.44	0.1	139	0.043	0.431	0.388	0.1	0.855	0.8	0.6	OVERLOAD	0	0	0	0.02	0	0	0
	2018-08-15 09:47:34	164	20.87	20.43	0.44	0.1	140	0.043	0.434	0.391	0.1	0.854	0.8	0.6	OVERLOAD	0	0	0	0.02	0	0	0
	2018-08-15 09:47:49	165	20.87	20.42	0.45	0.1	141	0.043	0.437	0.394	0.1	0.857	0.8	0.6	OVERLOAD	0	0	0	0.02	0	0	0
	2018-08-15 09:48:04	165	20.87	20.42	0.45	0.1	144	0.043	0.444	0.401	0.1	0.869	0.8	0.6	OVERLOAD	0	0	0	0.02	0	0	0
20 meter/min & 25 degrees	2018-08-15 09:48:19	170	20.87	20.41	0.46	0.1	145	0.043	0.449	0.406	0.1	0.856	0.8	0.6	OVERLOAD	0	0	0	0.02	0	0	0
	2018-08-15 09:48:34	170	20.87	20.41	0.46	0.1	146	0.043	0.45	0.407	0.1	0.859	0.8	0.6	OVERLOAD	0	0	0	0.02	0	0	0
	2018-08-15 09:48:49	169	20.87	20.41	0.46	0.1	145	0.043	0.449	0.406	0.1	0.862	0.8	0.6	OVERLOAD	0	0	0	0.02	0	0	0
	2018-08-15 09:49:04	169	20.87	20.41	0.46	0.1	144	0.043	0.446	0.403	0.1	0.854	0.8	0.6	OVERLOAD	0	0	0	0.02	0	0	0
	2018-08-15 09:49:19	168	20.87	20.41	0.46	0.1	144	0.043	0.445	0.402	0.1	0.855	0.8	0.6	OVERLOAD	0	0	0	0.02	0	0	0
	2018-08-15 09:49:34	168	20.87	20.41	0.45	0.1	143	0.043	0.443	0.4	0.1	0.852	0.8	0.6	OVERLOAD	0	0	0	0.02	0	0	0
	2018-08-15 09:49:49	171	20.87	20.41	0.46	0.1	147	0.043	0.454	0.411	0.1	0.863	0.8	0.6	OVERLOAD	0	0	0	0.02	0	0	0
	2018-08-15 09:50:04	177	20.87	20.39	0.48	0.1	157	0.043	0.481	0.438	0.1	0.885	0.9	0.6	OVERLOAD	0	0	0	0.02	0	0	0
20 meter/min & 25 degrees	2018-08-15 09:50:19	185	20.87	20.36	0.51	0.1	171	0.043	0.521	0.478	0.1	0.926	0.9	0.6	OVERLOAD	0	0	0	0.02	0	0	0
	2018-08-15 09:50:34	192	20.87	20.34	0.53	0.1	185	0.043	0.559	0.516	0.1	0.964	1	0.6	OVERLOAD	0	0	0	0.02	0	0	0
	2018-08-15 09:50:49	189	20.87	20.34	0.53	0.1	183	0.043	0.554	0.511	0.1	0.966	0.9	0.6	OVERLOAD	0	0	0	0.02	0	0	0

## Sheet: 2-P1183
	Subject ID	2-P1183
	Weight(g)	24.06
	Sex	Male
	Genotype
	Diet	Chow
===============	===============	===============	===============	===============	===============	===============	===============	===============	===============	===============	===============	===============	===============	===============	===============	===============	===============	===============	===============	===============	===============	===============
	DATE/TIME	VO2	O2IN	O2OUT	DO2	ACCO2	VCO2	CO2IN	CO2OUT	DCO2	ACCCO2	RER	HEAT	FLOW	STATUS1	FEED1	FEED1 ACC	DRINK1	DRINK1 ACC	XTOT	XAMB	ZTOT
===============		ml/hr	%	%		l	ml/hr	%	%		l		kcal/hr	LPM		GRAMS	GRAMS	ml	ml	COUNTS	COUNTS	COUNTS
Basal	2018-08-15 11:06:30	105	20.89	20.61	0.28	0	86	0.045	0.284	0.239	0	0.813	0.5	0.6	OVERLOAD	0	0	0	0	0	0	0
	2018-08-15 11:06:45	106	20.89	20.6	0.29	0	88	0.045	0.29	0.246	0	0.831	0.5	0.6	OVERLOAD	0	0	0	0	0	0	0
	2018-08-15 11:07:00	110	20.89	20.59	0.3	0	92	0.045	0.302	0.257	0	0.838	0.5	0.6	OVERLOAD	0	0	0	0	0	0	0
	2018-08-15 11:07:15	111	20.89	20.59	0.3	0	92	0.045	0.302	0.257	0	0.827	0.5	0.6	OVERLOAD	0	0	0	0	0	0	0
	2018-08-15 11:07:30	112	20.89	20.59	0.3	0	91	0.045	0.298	0.253	0	0.809	0.5	0.6	OVERLOAD	0	0	0	0	0	0	0
	2018-08-15 11:07:45	110	20.89	20.59	0.29	0	88	0.045	0.291	0.246	0	0.8	0.5	0.6	OVERLOAD	0	0	0	0	0	0	0
	2018-08-15 11:08:00	107	20.89	20.6	0.29	0	88	0.045	0.29	0.245	0	0.822	0.5	0.6	OVERLOAD	0	0	0	0	0	0	0
	2018-08-15 11:08:15	113	20.89	20.59	0.3	0	93	0.045	0.305	0.26	0	0.825	0.5	0.6	OVERLOAD	0	0	0	0	0	0	0
	2018-08-15 11:08:30	109	20.89	20.6	0.29	0	87	0.045	0.289	0.244	0	0.8	0.5	0.6	OVERLOAD	0	0	0	0	0	0	0
	2018-08-15 11:08:45	100	20.89	20.62	0.27	0	81	0.045	0.27	0.225	0	0.804	0.5	0.6	OVERLOAD	0	0	0	0	0	0	0
	2018-08-15 11:09:00	94	20.89	20.64	0.25	0	74	0.045	0.252	0.208	0	0.788	0.5	0.6	OVERLOAD	0	0	0	0	0	0	0
	2018-08-15 11:09:15	102	20.89	20.62	0.27	0	83	0.045	0.277	0.232	0	0.816	0.5	0.6	OVERLOAD	0	0	0	0	0	0	0
	2018-08-15 11:09:30	104	20.89	20.61	0.28	0	83	0.045	0.277	0.233	0	0.801	0.5	0.6	OVERLOAD	0	0	0	0	0	0	0
	2018-08-15 11:09:45	101	20.89	20.62	0.27	0	78	0.045	0.263	0.218	0	0.774	0.5	0.6	OVERLOAD	0	0	0	0	0	0	0
	2018-08-15 11:10:00	95	20.89	20.64	0.25	0	76	0.045	0.256	0.212	0	0.796	0.5	0.6	OVERLOAD	0	0	0	0	0	0	0
	2018-08-15 11:10:15	98	20.89	20.63	0.26	0	79	0.045	0.265	0.221	0	0.807	0.5	0.6	OVERLOAD	0	0	0	0	0	0	0
	2018-08-15 11:10:30	95	20.89	20.64	0.25	0	73	0.045	0.249	0.204	0	0.769	0.5	0.6	OVERLOAD	0	0	0	0	0	0	0
	2018-08-15 11:10:45	88	20.89	20.66	0.23	0	67	0.045	0.233	0.188	0	0.768	0.4	0.6	OVERLOAD	0	0	0	0	0	0	0
	2018-08-15 11:11:00	81	20.89	20.67	0.21	0	62	0.045	0.218	0.174	0	0.77	0.4	0.6	OVERLOAD	0	0	0	0	0	0	0
	2018-08-15 11:11:15	86	20.89	20.66	0.23	0	70	0.045	0.241	0.196	0	0.82	0.4	0.6	OVERLOAD	0	0	0	0	0	0	0
5 meter/min	2018-08-15 11:11:30	90	20.89	20.65	0.24	0	69	0.045	0.238	0.193	0	0.771	0.4	0.6	OVERLOAD	0	0	0	0	0	0	0
	2018-08-15 11:11:45	92	20.89	20.64	0.25	0	78	0.045	0.262	0.218	0	0.85	0.4	0.6	OVERLOAD	0	0	0	0	0	0	0
	2018-08-15 11:12:00	126	20.89	20.55	0.34	0	105	0.045	0.337	0.292	0	0.828	0.6	0.6	OVERLOAD	0	0	0	0	0	0	0
	2018-08-15 11:12:15	138	20.89	20.52	0.37	0	107	0.045	0.343	0.298	0	0.776	0.7	0.6	OVERLOAD	0	0	0	0	0	0	0
	2018-08-15 11:12:30	138	20.89	20.52	0.37	0	110	0.045	0.353	0.308	0	0.798	0.7	0.6	OVERLOAD	0	0	0	0	0	0	0
	2018-08-15 11:12:45	140	20.89	20.51	0.38	0	113	0.045	0.361	0.316	0	0.806	0.7	0.6	OVERLOAD	0	0	0	0	0	0	0
	2018-08-15 11:13:00	140	20.89	20.51	0.38	0	114	0.045	0.364	0.319	0	0.815	0.7	0.6	OVERLOAD	0	0	0	0	0	0	0
	2018-08-15 11:13:15	142	20.89	20.51	0.38	0	115	0.045	0.367	0.322	0	0.814	0.7	0.6	OVERLOAD	0	0	0	0	0	0	0
10 meter/min	2018-08-15 11:13:30	141	20.89	20.51	0.38	0	114	0.045	0.364	0.32	0	0.814	0.7	0.6	OVERLOAD	0	0	0	0	0	0	0
	2018-08-15 11:13:45	144	20.89	20.5	0.39	0	118	0.045	0.373	0.329	0	0.819	0.7	0.6	OVERLOAD	0	0	0	0	0	0	0
	2018-08-15 11:14:00	147	20.89	20.5	0.39	0	118	0.045	0.375	0.331	0	0.804	0.7	0.6	OVERLOAD	0	0	0	0	0	0	0
	2018-08-15 11:14:15	147	20.89	20.5	0.39	0	118	0.045	0.374	0.33	0	0.803	0.7	0.6	OVERLOAD	0	0	0	0	0	0	0
	2018-08-15 11:14:30	150	20.89	20.49	0.4	0	123	0.045	0.39	0.345	0	0.822	0.7	0.6	OVERLOAD	0	0	0	0	0	0	0
	2018-08-15 11:14:45	156	20.89	20.47	0.42	0	130	0.045	0.409	0.365	0	0.836	0.8	0.6	OVERLOAD	0	0	0	0	0	0	0
	2018-08-15 11:15:00	157	20.89	20.46	0.43	0	135	0.045	0.421	0.376	0	0.855	0.8	0.6	OVERLOAD	0	0	0	0	0	0	0
	2018-08-15 11:15:15	160	20.89	20.46	0.43	0	139	0.045	0.434	0.389	0	0.872	0.8	0.6	OVERLOAD	0	0	0	0	0	0	0
15 meter/min	2018-08-15 11:15:30	159	20.89	20.46	0.43	0	140	0.045	0.435	0.391	0	0.878	0.8	0.6	OVERLOAD	0	0	0	0	0	0	0
	2018-08-15 11:15:45	158	20.89	20.46	0.43	0	139	0.045	0.432	0.387	0	0.877	0.8	0.6	OVERLOAD	0	0	0	0	0	0	0
	2018-08-15 11:16:00	160	20.89	20.45	0.44	0	141	0.045	0.438	0.393	0	0.879	0.8	0.6	OVERLOAD	0	0	0	0	0	0	0
	2018-08-15 11:16:15	162	20.89	20.45	0.44	0	141	0.045	0.439	0.394	0	0.872	0.8	0.6	OVERLOAD	0	0	0.02	0.02	0	0	0
	2018-08-15 11:16:30	163	20.89	20.45	0.44	0	142	0.045	0.44	0.395	0	0.869	0.8	0.6	OVERLOAD	0	0	0	0.02	0	0	0
	2018-08-15 11:16:45	162	20.89	20.45	0.44	0	140	0.045	0.437	0.392	0	0.865	0.8	0.6	OVERLOAD	0	0	0	0.02	0	0	0
	2018-08-15 11:17:00	163	20.89	20.45	0.44	0	141	0.045	0.438	0.394	0	0.866	0.8	0.6	OVERLOAD	0	0	0	0.02	0	0	0
	2018-08-15 11:17:15	164	20.89	20.45	0.44	0	140	0.045	0.436	0.392	0	0.854	0.8	0.6	OVERLOAD	0	0	0	0.02	0	0	0
20 meter/min	2018-08-15 11:17:30	164	20.89	20.45	0.44	0	141	0.045	0.439	0.394	0	0.861	0.8	0.6	OVERLOAD	0	0	0	0.02	0	0	0
	2018-08-15 11:17:45	165	20.89	20.44	0.45	0	142	0.045	0.441	0.397	0	0.861	0.8	0.6	OVERLOAD	0	0	0	0.02	0	0	0
	2018-08-15 11:18:00	164	20.89	20.44	0.45	0	141	0.045	0.438	0.394	0	0.857	0.8	0.6	OVERLOAD	0	0	0	0.02	0	0	0
	2018-08-15 11:18:15	163	20.89	20.45	0.44	0	140	0.045	0.436	0.391	0	0.858	0.8	0.6	OVERLOAD	0	0	0	0.02	0	0	0
	2018-08-15 11:18:30	163	20.89	20.45	0.44	0	139	0.045	0.432	0.388	0	0.853	0.8	0.6	OVERLOAD	0	0	0	0.02	0	0	0
	2018-08-15 11:18:45	163	20.89	20.45	0.44	0	138	0.045	0.431	0.386	0	0.848	0.8	0.6	OVERLOAD	0	0	0	0.02	0	0	0
	2018-08-15 11:19:00	162	20.89	20.45	0.44	0	137	0.045	0.429	0.384	0	0.846	0.8	0.6	OVERLOAD	0	0	0	0.02	0	0	0
	2018-08-15 11:19:15	161	20.89	20.45	0.44	0	136	0.045	0.426	0.381	0	0.846	0.8	0.6	OVERLOAD	0	0	0	0.02	0	0	0
20 meter/min & 5 degrees	2018-08-15 11:19:30	161	20.89	20.45	0.44	0	136	0.045	0.424	0.38	0	0.844	0.8	0.6	OVERLOAD	0	0	0	0.02	0	0	0
	2018-08-15 11:19:45	161	20.89	20.45	0.43	0	135	0.045	0.423	0.378	0	0.842	0.8	0.6	OVERLOAD	0	0	0	0.02	0	0	0
	2018-08-15 11:20:00	161	20.89	20.45	0.44	0	136	0.045	0.423	0.379	0	0.839	0.8	0.6	OVERLOAD	0	0	0	0.02	0	0	0
	2018-08-15 11:20:15	162	20.89	20.45	0.44	0	136	0.045	0.423	0.379	0	0.838	0.8	0.6	OVERLOAD	0	0	0	0.02	0	0	0
	2018-08-15 11:20:30	161	20.89	20.45	0.44	0	135	0.045	0.422	0.377	0	0.837	0.8	0.6	OVERLOAD	0	0	0	0.02	0	0	0
	2018-08-15 11:20:45	161	20.89	20.46	0.43	0	135	0.045	0.421	0.376	0	0.836	0.8	0.6	OVERLOAD	0	0	0	0.02	0	0	0
	2018-08-15 11:21:00	160	20.89	20.46	0.43	0	134	0.045	0.419	0.374	0	0.837	0.8	0.6	OVERLOAD	0	0	0	0.02	0	0	0
	2018-08-15 11:21:15	160	20.89	20.46	0.43	0	133	0.045	0.417	0.372	0	0.832	0.8	0.6	OVERLOAD	0	0	0	0.02	0	0	0
20 meter/min & 10 degrees	2018-08-15 11:21:30	159	20.89	20.46	0.43	0	133	0.045	0.415	0.37	0	0.835	0.8	0.6	OVERLOAD	0	0	0	0.02	0	0	0
	2018-08-15 11:21:45	159	20.89	20.46	0.43	0	133	0.045	0.415	0.371	0	0.833	0.8	0.6	OVERLOAD	0	0	0	0.02	0	0	0
	2018-08-15 11:22:00	160	20.89	20.46	0.43	0	133	0.045	0.416	0.372	0	0.832	0.8	0.6	OVERLOAD	0	0	0	0.02	0	0	0
	2018-08-15 11:22:15	161	20.89	20.46	0.43	0	133	0.045	0.418	0.373	0	0.828	0.8	0.6	OVERLOAD	0	0	0	0.02	0	0	0
	2018-08-15 11:22:30	162	20.89	20.45	0.44	0	136	0.045	0.424	0.38	0	0.837	0.8	0.6	OVERLOAD	0	0	0	0.02	0	0	0
	2018-08-15 11:22:45	164	20.89	20.45	0.44	0	137	0.045	0.427	0.383	0	0.835	0.8	0.6	OVERLOAD	0	0	0	0.02	0	0	0
	2018-08-15 11:23:00	163	20.89	20.45	0.44	0	137	0.045	0.426	0.382	0	0.836	0.8	0.6	OVERLOAD	0	0	0	0.02	0	0	0
	2018-08-15 11:23:15	163	20.89	20.45	0.44	0	136	0.045	0.425	0.38	0	0.837	0.8	0.6	OVERLOAD	0	0	0	0.02	0	0	0
20 meter/min & 15 degrees	2018-08-15 11:23:30	162	20.89	20.45	0.44	0	135	0.045	0.423	0.378	0	0.838	0.8	0.6	OVERLOAD	0	0	0	0.02	0	0	0
	2018-08-15 11:23:45	161	20.89	20.45	0.44	0	135	0.045	0.423	0.378	0	0.838	0.8	0.6	OVERLOAD	0	0	0	0.02	0	0	0
	2018-08-15 11:24:00	163	20.89	20.45	0.44	0	137	0.045	0.428	0.384	0	0.842	0.8	0.6	OVERLOAD	0	0	0	0.02	0	0	0
	2018-08-15 11:24:15	166	20.89	20.44	0.45	0	140	0.045	0.435	0.391	0	0.844	0.8	0.6	OVERLOAD	0	0	0	0.02	0	0	0
	2018-08-15 11:24:30	167	20.89	20.44	0.45	0	141	0.045	0.44	0.395	0	0.848	0.8	0.6	OVERLOAD	0	0	0	0.02	0	0	0
	2018-08-15 11:24:45	168	20.89	20.44	0.45	0	141	0.045	0.44	0.395	0	0.843	0.8	0.6	OVERLOAD	0	0	0	0.02	0	0	0
	2018-08-15 11:25:00	166	20.89	20.44	0.45	0	141	0.045	0.438	0.393	0	0.849	0.8	0.6	OVERLOAD	0	0	0	0.02	0	0	0
	2018-08-15 11:25:15	166	20.89	20.44	0.45	0	141	0.045	0.438	0.394	0	0.849	0.8	0.6	OVERLOAD	0	0	0	0.02	0	0	0
20 meter/min & 20 degrees	2018-08-15 11:25:30	166	20.89	20.44	0.45	0	141	0.045	0.439	0.394	0	0.847	0.8	0.6	OVERLOAD	0	0	0	0.02	0	0	0
	2018-08-15 11:25:45	167	20.89	20.44	0.45	0	141	0.045	0.44	0.395	0	0.846	0.8	0.6	OVERLOAD	0	0	0	0.02	0	0	0
	2018-08-15 11:26:00	168	20.89	20.44	0.45	0	142	0.045	0.442	0.397	0	0.848	0.8	0.6	OVERLOAD	0	0	0	0.02	0	0	0
	2018-08-15 11:26:15	170	20.89	20.43	0.46	0	143	0.045	0.444	0.399	0	0.843	0.8	0.6	OVERLOAD	0	0	0	0.02	0	0	0
	2018-08-15 11:26:30	170	20.89	20.43	0.46	0	143	0.045	0.444	0.4	0	0.843	0.8	0.6	OVERLOAD	0	0	0	0.02	0	0	0
	2018-08-15 11:26:45	169	20.89	20.43	0.46	0	142	0.045	0.442	0.397	0	0.839	0.8	0.6	OVERLOAD	0	0	0	0.02	0	0	0
	2018-08-15 11:27:00	169	20.89	20.43	0.46	0	142	0.045	0.441	0.397	0	0.839	0.8	0.6	OVERLOAD	0	0	0	0.02	0	0	0
	2018-08-15 11:27:15	168	20.89	20.44	0.45	0.1	142	0.045	0.441	0.396	0	0.844	0.8	0.6	OVERLOAD	0	0	0	0.02	0	0	0
20 meter/min & 25 degrees	2018-08-15 11:27:30	170	20.89	20.43	0.46	0.1	143	0.045	0.445	0.4	0	0.843	0.8	0.6	OVERLOAD	0	0	0	0.02	0	0	0
	2018-08-15 11:27:45	171	20.89	20.43	0.46	0.1	143	0.045	0.445	0.401	0	0.84	0.8	0.6	OVERLOAD	0	0	0	0.02	0	0	0
	2018-08-15 11:28:00	172	20.89	20.43	0.46	0.1	145	0.045	0.45	0.405	0	0.844	0.8	0.6	OVERLOAD	0	0	0	0.02	0	0	0
	2018-08-15 11:28:15	176	20.89	20.41	0.48	0.1	151	0.045	0.465	0.421	0	0.858	0.9	0.6	OVERLOAD	0	0	0	0.02	0	0	0
	2018-08-15 11:28:30	179	20.89	20.4	0.49	0.1	157	0.045	0.483	0.438	0	0.875	0.9	0.6	OVERLOAD	0	0	0	0.02	0	0	0
	2018-08-15 11:28:45	182	20.89	20.39	0.5	0.1	162	0.045	0.496	0.451	0	0.886	0.9	0.6	OVERLOAD	0	0	0	0.02	0	0	0
	2018-08-15 11:29:00	183	20.89	20.39	0.5	0.1	163	0.045	0.499	0.455	0	0.891	0.9	0.6	OVERLOAD	0	0	0	0.02	0	0	0
	2018-08-15 11:29:15	183	20.89	20.39	0.5	0.1	163	0.045	0.5	0.456	0	0.89	0.9	0.6	OVERLOAD	0	0	0	0.02	0	0	0
20 meter/min & 25 degrees	2018-08-15 11:29:30	184	20.89	20.39	0.5	0.1	163	0.045	0.501	0.457	0	0.887	0.9	0.6	OVERLOAD	0	0	0	0.02	0	0	0
	2018-08-15 11:29:45	186	20.89	20.38	0.51	0.1	166	0.045	0.508	0.463	0	0.89	0.9	0.6	OVERLOAD	0	0	0	0.02	0	0	0
	2018-08-15 11:30:00	189	20.89	20.37	0.52	0.1	169	0.045	0.517	0.472	0	0.895	0.9	0.6	OVERLOAD	0	0	0	0.02	0	0	0
	2018-08-15 11:30:15	190	20.89	20.37	0.52	0.1	172	0.045	0.526	0.481	0	0.905	0.9	0.6	OVERLOAD	0	0	0	0.02	0	0	0
	2018-08-15 11:30:30	191	20.89	20.37	0.52	0.1	174	0.045	0.53	0.485	0.1	0.908	0.9	0.6	OVERLOAD	0	0	0	0.02	0	0	0
	2018-08-15 11:30:45	191	20.89	20.37	0.52	0.1	173	0.045	0.529	0.484	0.1	0.908	0.9	0.6	OVERLOAD	0	0	0	0.02	0	0	0
	2018-08-15 11:31:00	191	20.89	20.37	0.52	0.1	173	0.045	0.527	0.483	0.1	0.906	0.9	0.6	OVERLOAD	0	0	0	0.02	0	0	0
	2018-08-15 11:31:15	190	20.89	20.37	0.52	0.1	171	0.045	0.523	0.478	0.1	0.9	0.9	0.6	OVERLOAD	0	0	0	0.02	0	0	0
20 meter/min & 25 degrees	2018-08-15 11:31:30	189	20.89	20.37	0.52	0.1	170	0.045	0.52	0.476	0.1	0.9	0.9	0.6	OVERLOAD	0	0	0	0.02	0	0	0
	2018-08-15 11:31:45	189	20.89	20.37	0.52	0.1	169	0.045	0.517	0.473	0.1	0.896	0.9	0.6	OVERLOAD	0	0	0	0.02	0	0	0
	2018-08-15 11:32:00	189	20.89	20.37	0.52	0.1	168	0.045	0.514	0.47	0.1	0.889	0.9	0.6	OVERLOAD	0	0	0	0.02	0	0	0
	2018-08-15 11:32:15	189	20.89	20.37	0.51	0.1	168	0.045	0.513	0.468	0.1	0.888	0.9	0.6	OVERLOAD	0	0	0	0.02	0	0	0
	2018-08-15 11:32:30	189	20.89	20.37	0.52	0.1	167	0.045	0.511	0.466	0.1	0.883	0.9	0.6	OVERLOAD	0	0	0	0.02	0	0	0
	2018-08-15 11:32:45	189	20.89	20.37	0.52	0.1	167	0.045	0.51	0.465	0.1	0.88	0.9	0.6	OVERLOAD	0	0	0	0.02	0	0	0
	2018-08-15 11:33:00	190	20.89	20.37	0.52	0.1	166	0.045	0.509	0.465	0.1	0.877	0.9	0.6	OVERLOAD	0	0	0	0.02	0	0	0
	2018-08-15 11:33:15	189	20.89	20.38	0.51	0.1	165	0.045	0.507	0.462	0.1	0.876	0.9	0.6	OVERLOAD	0	0	0	0.02	0	0	0
20 meter/min & 25 degrees	2018-08-15 11:33:30	189	20.89	20.38	0.51	0.1	164	0.045	0.503	0.459	0.1	0.869	0.9	0.6	OVERLOAD	0	0	0	0.02	0	0	0
	2018-08-15 11:33:45	188	20.89	20.38	0.51	0.1	163	0.045	0.5	0.455	0.1	0.867	0.9	0.6	OVERLOAD	0	0	0	0.02	0	0	0
	2018-08-15 11:34:00	187	20.89	20.38	0.51	0.1	161	0.045	0.495	0.451	0.1	0.864	0.9	0.6	OVERLOAD	0	0	0	0.02	0	0	0
	2018-08-15 11:34:15	187	20.89	20.38	0.51	0.1	161	0.045	0.495	0.45	0.1	0.861	0.9	0.6	OVERLOAD	0	0	0	0.02	0	0	0
	2018-08-15 11:34:30	187	20.89	20.38	0.51	0.1	161	0.045	0.495	0.45	0.1	0.863	0.9	0.6	OVERLOAD	0	0	0	0.02	0	0	0
	2018-08-15 11:34:45	187	20.89	20.38	0.51	0.1	161	0.045	0.495	0.451	0.1	0.862	0.9	0.6	OVERLOAD	0	0	0	0.02	0	0	0
	2018-08-15 11:35:00	186	20.89	20.38	0.51	0.1	161	0.045	0.493	0.449	0.1	0.861	0.9	0.6	OVERLOAD	0	0	0	0.02	0	0	0
	2018-08-15 11:35:15	187	20.89	20.38	0.51	0.1	161	0.045	0.495	0.451	0.1	0.862	0.9	0.6	OVERLOAD	0	0	0	0.02	0	0	0
20 meter/min & 25 degrees	2018-08-15 11:35:30	187	20.89	20.38	0.51	0.1	161	0.045	0.496	0.451	0.1	0.861	0.9	0.6	OVERLOAD	0	0	0	0.02	0	0	0
	2018-08-15 11:35:45	188	20.89	20.38	0.51	0.1	163	0.045	0.499	0.455	0.1	0.863	0.9	0.6	OVERLOAD	0	0	0	0.02	0	0	0
	2018-08-15 11:36:00	188	20.89	20.38	0.51	0.1	162	0.045	0.497	0.452	0.1	0.86	0.9	0.6	OVERLOAD	0	0	0	0.02	0	0	0
	2018-08-15 11:36:15	187	20.89	20.38	0.51	0.1	161	0.045	0.494	0.449	0.1	0.861	0.9	0.6	OVERLOAD	0	0	0	0.02	0	0	0
	2018-08-15 11:36:30	185	20.89	20.39	0.5	0.1	159	0.045	0.49	0.445	0.1	0.861	0.9	0.6	OVERLOAD	0	0	0	0.02	0	0	0
	2018-08-15 11:36:45	186	20.89	20.39	0.5	0.1	160	0.045	0.492	0.448	0.1	0.864	0.9	0.6	OVERLOAD	0	0	0	0.02	0	0	0
	2018-08-15 11:37:00	186	20.89	20.38	0.51	0.1	160	0.045	0.493	0.448	0.1	0.861	0.9	0.6	OVERLOAD	0	0	0	0.02	0	0	0
	2018-08-15 11:37:15	186	20.89	20.39	0.5	0.1	160	0.045	0.49	0.446	0.1	0.858	0.9	0.6	OVERLOAD	0	0	0	0.02	0	0	0
20 meter/min & 25 degrees	2018-08-15 11:37:30	185	20.89	20.39	0.5	0.1	159	0.045	0.488	0.444	0.1	0.858	0.9	0.6	OVERLOAD	0	0	0	0.02	0	0	0
	2018-08-15 11:37:45	185	20.89	20.39	0.5	0.1	158	0.045	0.486	0.441	0.1	0.855	0.9	0.6	OVERLOAD	0	0	0	0.02	0	0	0
	2018-08-15 11:38:00	184	20.89	20.39	0.5	0.1	156	0.045	0.48	0.436	0.1	0.848	0.9	0.6	OVERLOAD	0	0	0	0.02	0	0	0
	2018-08-15 11:38:15	183	20.89	20.4	0.49	0.1	155	0.045	0.479	0.434	0.1	0.851	0.9	0.6	OVERLOAD	0	0	0	0.02	0	0	0
	2018-08-15 11:38:30	183	20.89	20.39	0.5	0.1	156	0.045	0.48	0.435	0.1	0.851	0.9	0.6	OVERLOAD	0	0	0	0.02	0	0	0
	2018-08-15 11:38:45	183	20.89	20.39	0.5	0.1	155	0.045	0.477	0.433	0.1	0.845	0.9	0.6	OVERLOAD	0	0	0	0.02	0	0	0
	2018-08-15 11:39:00	183	20.89	20.4	0.49	0.1	154	0.045	0.475	0.431	0.1	0.843	0.9	0.6	OVERLOAD	0	0	0	0.02	0	0	0
	2018-08-15 11:39:15	182	20.89	20.4	0.49	0.1	153	0.045	0.472	0.428	0.1	0.843	0.9	0.6	OVERLOAD	0	0	0	0.02	0	0	0
20 meter/min & 25 degrees	2018-08-15 11:39:30	181	20.89	20.4	0.49	0.1	152	0.045	0.47	0.425	0.1	0.842	0.9	0.6	OVERLOAD	0	0	0	0.02	0	0	0
	2018-08-15 11:39:45	181	20.89	20.4	0.49	0.1	153	0.045	0.472	0.427	0.1	0.844	0.9	0.6	OVERLOAD	0	0	0	0.02	0	0	0
	2018-08-15 11:40:00	188	20.89	20.38	0.51	0.1	162	0.045	0.496	0.451	0.1	0.861	0.9	0.6	OVERLOAD	0	0	0	0.02	0	0	0
	2018-08-15 11:40:15	188	20.89	20.38	0.51	0.1	161	0.045	0.495	0.45	0.1	0.857	0.9	0.6	OVERLOAD	0	0	0	0.02	0	0	0

## Sheet: 3-P1184
	Subject ID	3-P1184
	Weight(g)	21.23
	Sex	Male
	Genotype
	Diet	Chow
===============	===============	===============	===============	===============	===============	===============	===============	===============	===============	===============	===============	===============	===============	===============	===============	===============	===============	===============	===============	===============	===============	===============
	DATE/TIME	VO2	O2IN	O2OUT	DO2	ACCO2	VCO2	CO2IN	CO2OUT	DCO2	ACCCO2	RER	HEAT	FLOW	STATUS1	FEED1	FEED1 ACC	DRINK1	DRINK1 ACC	XTOT	XAMB	ZTOT
===============		ml/hr	%	%		l	ml/hr	%	%		l		kcal/hr	LPM		GRAMS	GRAMS	ml	ml	COUNTS	COUNTS	COUNTS
Basal	2018-08-16 08:24:03	84	20.88	20.66	0.23	0	67	0.044	0.231	0.186	0	0.792	0.4	0.6	OVERLOAD	0	0	0	0	0	0	0
	2018-08-16 08:24:18	90	20.88	20.65	0.24	0	70	0.044	0.24	0.195	0	0.779	0.4	0.6	OVERLOAD	0	0	0	0	0	0	0
	2018-08-16 08:24:33	91	20.88	20.64	0.24	0	70	0.044	0.241	0.197	0	0.774	0.4	0.6	OVERLOAD	0	0	0	0	0	0	0
	2018-08-16 08:24:48	94	20.88	20.63	0.25	0	73	0.044	0.249	0.205	0	0.78	0.4	0.6	OVERLOAD	0	0	0	0	0	0	0
	2018-08-16 08:25:03	99	20.88	20.62	0.26	0	77	0.044	0.258	0.214	0	0.776	0.5	0.6	OVERLOAD	0	0	0	0	0	0	0
	2018-08-16 08:25:18	97	20.88	20.63	0.26	0	74	0.044	0.252	0.207	0	0.764	0.5	0.6	OVERLOAD	0	0	0	0	0	0	0
	2018-08-16 08:25:33	95	20.88	20.63	0.25	0	74	0.044	0.25	0.205	0	0.776	0.5	0.6	OVERLOAD	0	0	0	0	0	0	0
	2018-08-16 08:25:48	94	20.88	20.63	0.25	0	73	0.044	0.249	0.205	0	0.778	0.4	0.6	OVERLOAD	0	0	0	0	0	0	0
	2018-08-16 08:26:03	93	20.88	20.64	0.25	0	73	0.044	0.247	0.203	0	0.781	0.4	0.6	OVERLOAD	0	0	0	0	0	0	0
	2018-08-16 08:26:18	92	20.88	20.64	0.24	0	71	0.044	0.244	0.199	0	0.778	0.4	0.6	OVERLOAD	0	0	0	0	0	0	0
	2018-08-16 08:26:33	90	20.88	20.65	0.24	0	70	0.044	0.241	0.196	0	0.781	0.4	0.6	OVERLOAD	0	0	0	0	0	0	0
	2018-08-16 08:26:48	86	20.88	20.66	0.23	0	69	0.044	0.238	0.193	0	0.808	0.4	0.6	OVERLOAD	0	0	0	0	0	0	0
	2018-08-16 08:27:03	89	20.88	20.65	0.24	0	70	0.044	0.24	0.195	0	0.79	0.4	0.6	OVERLOAD	0	0	0	0	0	0	0
	2018-08-16 08:27:18	95	20.88	20.63	0.25	0	77	0.044	0.26	0.215	0	0.813	0.5	0.6	OVERLOAD	0	0	0	0	0	0	0
	2018-08-16 08:27:33	98	20.88	20.62	0.26	0	77	0.044	0.26	0.215	0	0.79	0.5	0.6	OVERLOAD	0	0	0	0	0	0	0
	2018-08-16 08:27:48	94	20.88	20.63	0.25	0	73	0.044	0.248	0.204	0	0.771	0.5	0.6	OVERLOAD	0	0	0	0	0	0	0
	2018-08-16 08:28:03	91	20.88	20.64	0.24	0	71	0.044	0.242	0.198	0	0.777	0.4	0.6	OVERLOAD	0	0	0	0	0	0	0
	2018-08-16 08:28:18	90	20.88	20.65	0.24	0	69	0.044	0.238	0.194	0	0.775	0.4	0.6	OVERLOAD	0	0	0	0	0	0	0
	2018-08-16 08:28:33	87	20.88	20.65	0.23	0	68	0.044	0.233	0.189	0	0.773	0.4	0.6	OVERLOAD	0	0	0	0	0	0	0
	2018-08-16 08:28:48	83	20.88	20.66	0.22	0	64	0.044	0.222	0.177	0	0.766	0.4	0.6	OVERLOAD	0	0	0	0	0	0	0
5 meter/min	2018-08-16 08:29:03	79	20.88	20.67	0.21	0	61	0.044	0.216	0.171	0	0.776	0.4	0.6	OVERLOAD	0	0	0	0	0	0	0
	2018-08-16 08:29:18	79	20.88	20.67	0.21	0	63	0.044	0.22	0.176	0	0.794	0.4	0.6	OVERLOAD	0	0	0	0	0	0	0
	2018-08-16 08:29:33	87	20.88	20.65	0.23	0	71	0.044	0.242	0.198	0	0.811	0.4	0.6	OVERLOAD	0	0	0	0	0	0	0
	2018-08-16 08:29:48	96	20.88	20.63	0.26	0	79	0.044	0.265	0.221	0	0.822	0.5	0.6	OVERLOAD	0	0	0	0	0	0	0
	2018-08-16 08:30:03	103	20.88	20.61	0.28	0	85	0.044	0.281	0.237	0	0.823	0.5	0.6	OVERLOAD	0	0	0	0	0	0	0
	2018-08-16 08:30:18	109	20.88	20.59	0.29	0	89	0.044	0.293	0.249	0	0.82	0.5	0.6	OVERLOAD	0	0	0	0	0	0	0
	2018-08-16 08:30:33	114	20.88	20.58	0.31	0	93	0.044	0.304	0.259	0	0.813	0.5	0.6	OVERLOAD	0	0	0	0	0	0	0
	2018-08-16 08:30:48	117	20.88	20.57	0.32	0	95	0.044	0.31	0.266	0	0.809	0.6	0.6	OVERLOAD	0	0	0	0	0	0	0
10 meter/min	2018-08-16 08:31:03	122	20.88	20.56	0.33	0	98	0.044	0.317	0.273	0	0.801	0.6	0.6	OVERLOAD	0	0	0	0	0	0	0
	2018-08-16 08:31:18	125	20.88	20.55	0.34	0	101	0.044	0.327	0.283	0	0.808	0.6	0.6	OVERLOAD	0	0	0	0	0	0	0
	2018-08-16 08:31:33	131	20.88	20.53	0.35	0	106	0.044	0.34	0.296	0	0.805	0.6	0.6	OVERLOAD	0	0	0	0	0	0	0
	2018-08-16 08:31:48	134	20.88	20.53	0.36	0	107	0.044	0.345	0.3	0	0.8	0.6	0.6	OVERLOAD	0	0	0	0	0	0	0
	2018-08-16 08:32:03	136	20.88	20.52	0.36	0	109	0.044	0.349	0.304	0	0.802	0.7	0.6	OVERLOAD	0	0	0	0	0	0	0
	2018-08-16 08:32:18	137	20.88	20.52	0.37	0	110	0.044	0.351	0.306	0	0.801	0.7	0.6	OVERLOAD	0	0	0	0	0	0	0
	2018-08-16 08:32:33	136	20.88	20.52	0.36	0	109	0.044	0.349	0.305	0	0.8	0.7	0.6	OVERLOAD	0	0	0	0	0	0	0
	2018-08-16 08:32:48	136	20.88	20.52	0.36	0	109	0.044	0.348	0.303	0	0.801	0.7	0.6	OVERLOAD	0	0	0	0	0	0	0
15 meter/min	2018-08-16 08:33:03	135	20.88	20.52	0.36	0	108	0.044	0.345	0.301	0	0.8	0.6	0.6	OVERLOAD	0	0	0	0	0	0	0
	2018-08-16 08:33:18	134	20.88	20.53	0.36	0	108	0.044	0.345	0.301	0	0.802	0.6	0.6	OVERLOAD	0	0	0	0	0	0	0
	2018-08-16 08:33:33	135	20.88	20.52	0.36	0	108	0.044	0.345	0.301	0	0.801	0.6	0.6	OVERLOAD	0	0	0	0	0	0	0
	2018-08-16 08:33:48	134	20.88	20.53	0.36	0	108	0.044	0.346	0.301	0	0.804	0.6	0.6	OVERLOAD	0	0	0	0	0	0	0
	2018-08-16 08:34:03	134	20.88	20.53	0.36	0	108	0.044	0.346	0.302	0	0.808	0.6	0.6	OVERLOAD	0	0	0	0	0	0	0
	2018-08-16 08:34:18	133	20.88	20.53	0.36	0	108	0.044	0.346	0.301	0	0.807	0.6	0.6	OVERLOAD	0	0	0	0	0	0	0
	2018-08-16 08:34:33	133	20.88	20.53	0.36	0	108	0.044	0.345	0.301	0	0.81	0.6	0.6	OVERLOAD	0	0	0	0	0	0	0
	2018-08-16 08:34:48	133	20.88	20.53	0.36	0	107	0.044	0.345	0.3	0	0.809	0.6	0.6	OVERLOAD	0	0	0	0	0	0	0
20 meter/min	2018-08-16 08:35:03	132	20.88	20.53	0.35	0	107	0.044	0.344	0.3	0	0.812	0.6	0.6	OVERLOAD	0	0	0	0	0	0	0
	2018-08-16 08:35:18	132	20.88	20.53	0.35	0	107	0.044	0.343	0.299	0	0.813	0.6	0.6	OVERLOAD	0	0	0	0	0	0	0
	2018-08-16 08:35:33	132	20.88	20.53	0.35	0	108	0.044	0.345	0.301	0	0.816	0.6	0.6	OVERLOAD	0	0	0	0	0	0	0
	2018-08-16 08:35:48	131	20.88	20.53	0.35	0	108	0.044	0.347	0.302	0	0.825	0.6	0.6	OVERLOAD	0	0	0	0	0	0	0
	2018-08-16 08:36:03	131	20.88	20.53	0.35	0	108	0.044	0.347	0.303	0	0.824	0.6	0.6	OVERLOAD	0	0	0	0	0	0	0
	2018-08-16 08:36:18	132	20.88	20.53	0.35	0	109	0.044	0.348	0.303	0	0.825	0.6	0.6	OVERLOAD	0	0	0	0	0	0	0
	2018-08-16 08:36:33	130	20.88	20.53	0.35	0	109	0.044	0.349	0.304	0	0.836	0.6	0.6	OVERLOAD	0	0	0	0	0	0	0
	2018-08-16 08:36:48	132	20.88	20.53	0.36	0	109	0.044	0.349	0.304	0	0.822	0.6	0.6	OVERLOAD	0	0	0	0	0	0	0
20 meter/min & 5 degrees	2018-08-16 08:37:03	132	20.88	20.53	0.35	0	109	0.044	0.35	0.305	0	0.829	0.6	0.6	OVERLOAD	0	0	0	0	0	0	0
	2018-08-16 08:37:18	132	20.88	20.53	0.36	0	110	0.044	0.351	0.306	0	0.832	0.6	0.6	OVERLOAD	0	0	0	0	0	0	0
	2018-08-16 08:37:33	132	20.88	20.53	0.36	0	110	0.044	0.353	0.308	0	0.834	0.6	0.6	OVERLOAD	0	0	0	0	0	0	0
	2018-08-16 08:37:48	132	20.88	20.53	0.36	0	110	0.044	0.353	0.308	0	0.834	0.6	0.6	OVERLOAD	0	0	0	0	0	0	0
	2018-08-16 08:38:03	132	20.88	20.53	0.36	0	110	0.044	0.352	0.308	0	0.834	0.6	0.6	OVERLOAD	0	0	0	0	0	0	0
	2018-08-16 08:38:18	132	20.88	20.53	0.35	0	110	0.044	0.351	0.307	0	0.835	0.6	0.6	OVERLOAD	0	0	0	0	0	0	0
	2018-08-16 08:38:33	131	20.88	20.53	0.35	0	110	0.044	0.351	0.307	0	0.836	0.6	0.6	OVERLOAD	0	0	0	0	0	0	0
	2018-08-16 08:38:48	132	20.88	20.53	0.35	0	110	0.044	0.352	0.307	0	0.835	0.6	0.6	OVERLOAD	0	0	0	0	0	0	0
20 meter/min & 10 degrees	2018-08-16 08:39:03	131	20.88	20.53	0.35	0	110	0.044	0.352	0.307	0	0.837	0.6	0.6	OVERLOAD	0	0	0	0	0	0	0
	2018-08-16 08:39:18	131	20.88	20.53	0.35	0	110	0.044	0.351	0.307	0	0.839	0.6	0.6	OVERLOAD	0	0	0	0	0	0	0
	2018-08-16 08:39:33	131	20.88	20.53	0.35	0	111	0.044	0.354	0.309	0	0.843	0.6	0.6	OVERLOAD	0	0	0	0	0	0	0
	2018-08-16 08:39:48	132	20.88	20.53	0.36	0	111	0.044	0.354	0.31	0	0.843	0.6	0.6	OVERLOAD	0	0	0	0	0	0	0
	2018-08-16 08:40:03	131	20.88	20.53	0.35	0	111	0.044	0.353	0.309	0	0.844	0.6	0.6	OVERLOAD	0	0	0	0	0	0	0
	2018-08-16 08:40:18	131	20.88	20.53	0.35	0	111	0.044	0.354	0.309	0	0.845	0.6	0.6	OVERLOAD	0	0	0	0	0	0	0
	2018-08-16 08:40:33	132	20.88	20.53	0.36	0	112	0.044	0.356	0.312	0	0.848	0.6	0.6	OVERLOAD	0	0	0	0	0	0	0
	2018-08-16 08:40:48	132	20.88	20.53	0.36	0	112	0.044	0.357	0.313	0	0.851	0.6	0.6	OVERLOAD	0	0	0	0	0	0	0
20 meter/min & 15 degrees	2018-08-16 08:41:03	132	20.88	20.53	0.36	0	112	0.044	0.357	0.313	0	0.849	0.6	0.6	OVERLOAD	0	0	0	0	0	0	0
	2018-08-16 08:41:18	131	20.88	20.53	0.36	0	112	0.044	0.356	0.312	0	0.85	0.6	0.6	OVERLOAD	0	0	0	0	0	0	0
	2018-08-16 08:41:33	132	20.88	20.53	0.36	0	113	0.044	0.359	0.314	0	0.854	0.6	0.6	OVERLOAD	0	0	0	0	0	0	0
	2018-08-16 08:41:48	132	20.88	20.53	0.36	0	113	0.044	0.359	0.314	0	0.852	0.6	0.6	OVERLOAD	0	0	0	0	0	0	0
	2018-08-16 08:42:03	131	20.88	20.53	0.36	0	113	0.044	0.359	0.315	0	0.859	0.6	0.6	OVERLOAD	0	0	0	0	0	0	0
	2018-08-16 08:42:18	132	20.88	20.53	0.36	0	113	0.044	0.36	0.315	0	0.856	0.6	0.6	OVERLOAD	0	0	0	0	0	0	0
	2018-08-16 08:42:33	132	20.88	20.53	0.36	0	113	0.044	0.36	0.315	0	0.855	0.6	0.6	OVERLOAD	0	0	0	0	0	0	0
	2018-08-16 08:42:48	132	20.88	20.53	0.36	0	113	0.044	0.361	0.316	0	0.856	0.6	0.6	OVERLOAD	0	0	0	0	0	0	0
20 meter/min & 20 degrees	2018-08-16 08:43:03	133	20.88	20.53	0.36	0	114	0.044	0.362	0.317	0	0.857	0.6	0.6	OVERLOAD	0	0	0	0	0	0	0
	2018-08-16 08:43:18	133	20.88	20.52	0.36	0	114	0.044	0.363	0.319	0	0.858	0.6	0.6	OVERLOAD	0	0	0	0	0	0	0
	2018-08-16 08:43:33	134	20.88	20.52	0.36	0	116	0.044	0.369	0.325	0	0.864	0.7	0.6	OVERLOAD	0	0	0	0	0	0	0
	2018-08-16 08:43:48	136	20.88	20.52	0.37	0	118	0.044	0.374	0.33	0	0.871	0.7	0.6	OVERLOAD	0	0	0	0	0	0	0
	2018-08-16 08:44:03	136	20.88	20.51	0.37	0	120	0.044	0.378	0.334	0	0.877	0.7	0.6	OVERLOAD	0	0	0	0	0	0	0
	2018-08-16 08:44:18	137	20.88	20.51	0.37	0	120	0.044	0.379	0.334	0	0.876	0.7	0.6	OVERLOAD	0	0	0	0	0	0	0
	2018-08-16 08:44:33	138	20.88	20.51	0.37	0	120	0.044	0.381	0.336	0	0.875	0.7	0.6	OVERLOAD	0	0	0	0	0	0	0
	2018-08-16 08:44:48	137	20.88	20.51	0.37	0	120	0.044	0.38	0.336	0	0.877	0.7	0.6	OVERLOAD	0	0	0	0	0	0	0
20 meter/min & 25 degrees	2018-08-16 08:45:03	138	20.88	20.51	0.38	0	121	0.044	0.381	0.337	0	0.873	0.7	0.6	OVERLOAD	0	0	0	0	0	0	0
	2018-08-16 08:45:18	138	20.88	20.51	0.38	0	121	0.044	0.381	0.337	0	0.874	0.7	0.6	OVERLOAD	0	0	0	0	0	0	0
	2018-08-16 08:45:33	139	20.88	20.51	0.38	0	121	0.044	0.383	0.339	0	0.874	0.7	0.6	OVERLOAD	0	0	0	0	0	0	0
	2018-08-16 08:45:48	139	20.88	20.51	0.38	0	122	0.044	0.386	0.341	0	0.877	0.7	0.6	OVERLOAD	0	0	0	0	0	0	0
	2018-08-16 08:46:03	140	20.88	20.5	0.38	0	123	0.044	0.388	0.344	0	0.879	0.7	0.6	OVERLOAD	0	0	0	0	0	0	0
	2018-08-16 08:46:18	141	20.88	20.5	0.38	0	124	0.044	0.391	0.347	0	0.881	0.7	0.6	OVERLOAD	0	0	0	0	0	0	0
	2018-08-16 08:46:33	142	20.88	20.5	0.39	0	127	0.044	0.399	0.355	0	0.894	0.7	0.6	OVERLOAD	0	0	0	0	0	0	0
	2018-08-16 08:46:48	144	20.88	20.49	0.39	0	131	0.044	0.411	0.367	0	0.912	0.7	0.6	OVERLOAD	0	0	0	0	0	0	0
20 meter/min & 25 degrees	2018-08-16 08:47:03	144	20.88	20.49	0.4	0	133	0.044	0.416	0.371	0	0.922	0.7	0.6	OVERLOAD	0	0	0	0	0	0	0
	2018-08-16 08:47:18	144	20.88	20.49	0.4	0	133	0.044	0.416	0.372	0	0.923	0.7	0.6	OVERLOAD	0	0	0	0	0	0	0
	2018-08-16 08:47:33	144	20.88	20.49	0.4	0	133	0.044	0.415	0.37	0	0.921	0.7	0.6	OVERLOAD	0	0	0	0	0	0	0
	2018-08-16 08:47:48	144	20.88	20.49	0.39	0	132	0.044	0.413	0.368	0	0.919	0.7	0.6	OVERLOAD	0	0	0	0	0	0	0
	2018-08-16 08:48:03	144	20.88	20.49	0.39	0	132	0.044	0.412	0.367	0	0.915	0.7	0.6	OVERLOAD	0	0	0	0	0	0	0
	2018-08-16 08:48:18	144	20.88	20.49	0.39	0.1	131	0.044	0.411	0.366	0	0.911	0.7	0.6	OVERLOAD	0	0	0	0	0	0	0
	2018-08-16 08:48:33	144	20.88	20.49	0.39	0.1	131	0.044	0.41	0.366	0	0.91	0.7	0.6	OVERLOAD	0	0	0	0	0	0	0
	2018-08-16 08:48:48	144	20.88	20.49	0.39	0.1	131	0.044	0.41	0.365	0	0.908	0.7	0.6	OVERLOAD	0	0	0	0	0	0	0
20 meter/min & 25 degrees	2018-08-16 08:49:03	145	20.88	20.49	0.4	0.1	131	0.044	0.412	0.367	0	0.909	0.7	0.6	OVERLOAD	0	0	0	0	0	0	0
	2018-08-16 08:49:18	145	20.88	20.49	0.4	0.1	131	0.044	0.411	0.367	0	0.909	0.7	0.6	OVERLOAD	0	0	0	0	0	0	0
	2018-08-16 08:49:33	145	20.88	20.49	0.4	0.1	132	0.044	0.412	0.368	0	0.909	0.7	0.6	OVERLOAD	0	0	0	0	0	0	0
	2018-08-16 08:49:48	145	20.88	20.49	0.4	0.1	132	0.044	0.413	0.369	0	0.912	0.7	0.6	OVERLOAD	0	0	0	0	0	0	0
	2018-08-16 08:50:03	145	20.88	20.49	0.4	0.1	132	0.044	0.413	0.369	0	0.908	0.7	0.6	OVERLOAD	0	0	0	0	0	0	0
	2018-08-16 08:50:18	145	20.88	20.49	0.4	0.1	131	0.044	0.411	0.367	0	0.907	0.7	0.6	OVERLOAD	0	0	0	0	0	0	0
	2018-08-16 08:50:33	145	20.88	20.49	0.4	0.1	131	0.044	0.411	0.366	0	0.904	0.7	0.6	OVERLOAD	0	0	0	0	0	0	0
	2018-08-16 08:50:48	145	20.88	20.49	0.4	0.1	131	0.044	0.41	0.366	0	0.9	0.7	0.6	OVERLOAD	0	0	0	0	0	0	0
20 meter/min & 25 degrees	2018-08-16 08:51:03	146	20.88	20.49	0.4	0.1	131	0.044	0.41	0.365	0	0.897	0.7	0.6	OVERLOAD	0	0	0	0	0	0	0
	2018-08-16 08:51:18	146	20.88	20.49	0.4	0.1	130	0.044	0.409	0.364	0	0.895	0.7	0.6	OVERLOAD	0	0	0	0	0	0	0
	2018-08-16 08:51:33	144	20.88	20.49	0.39	0.1	130	0.044	0.409	0.364	0	0.904	0.7	0.6	OVERLOAD	0	0	0	0	0	0	0
	2018-08-16 08:51:48	147	20.88	20.48	0.4	0.1	130	0.044	0.408	0.364	0	0.886	0.7	0.6	OVERLOAD	0	0	0	0	0	0	0
	2018-08-16 08:52:03	147	20.88	20.48	0.4	0.1	131	0.044	0.409	0.365	0	0.891	0.7	0.6	OVERLOAD	0	0	0	0	0	0	0
	2018-08-16 08:52:18	146	20.88	20.49	0.4	0.1	131	0.044	0.411	0.367	0.1	0.898	0.7	0.6	OVERLOAD	0	0	0	0	0	0	0
	2018-08-16 08:52:33	149	20.88	20.48	0.41	0.1	135	0.044	0.423	0.378	0.1	0.911	0.7	0.6	OVERLOAD	0	0	0	0	0	0	0
	2018-08-16 08:52:48	154	20.88	20.46	0.43	0.1	147	0.044	0.456	0.411	0.1	0.958	0.8	0.6	OVERLOAD	0	0	0	0	0	0	0
20 meter/min & 25 degrees	2018-08-16 08:53:03	158	20.88	20.44	0.44	0.1	157	0.044	0.484	0.439	0.1	0.997	0.8	0.6	OVERLOAD	0	0	0	0	0	0	0
	2018-08-16 08:53:18	156	20.88	20.45	0.44	0.1	162	0.044	0.496	0.451	0.1	1.035	0.8	0.6	OVERLOAD	0	0	0	0	0	0	0
	2018-08-16 08:53:33	158	20.88	20.44	0.45	0.1	169	0.044	0.515	0.471	0.1	1.067	0.8	0.6	OVERLOAD	0	0	0	0	0	0	0
	2018-08-16 08:53:48	159	20.88	20.43	0.45	0.1	172	0.044	0.523	0.479	0.1	1.077	0.8	0.6	OVERLOAD	0	0	0	0	0	0	0

## Sheet: 4-P1185
	Subject ID	4-P1185
	Weight(g)	23.36
	Sex	Male
	Genotype
	Diet	Chow
===============	===============	===============	===============	===============	===============	===============	===============	===============	===============	===============	===============	===============	===============	===============	===============	===============	===============	===============	===============	===============	===============	===============
	DATE/TIME	VO2	O2IN	O2OUT	DO2	ACCO2	VCO2	CO2IN	CO2OUT	DCO2	ACCCO2	RER	HEAT	FLOW	STATUS1	FEED1	FEED1 ACC	DRINK1	DRINK1 ACC	XTOT	XAMB	ZTOT
===============		ml/hr	%	%		l	ml/hr	%	%		l		kcal/hr	LPM		GRAMS	GRAMS	ml	ml	COUNTS	COUNTS	COUNTS
Basal	2018-08-16 10:40:21	75	20.99	20.78	0.2	0	63	0.041	0.217	0.176	0	0.841	0.4	0.6	OVERLOAD	0	0	0	0	0	0	0
	2018-08-16 10:40:36	74	20.99	20.79	0.2	0	61	0.041	0.211	0.169	0	0.817	0.4	0.6	OVERLOAD	0	0	0	0	0	0	0
	2018-08-16 10:40:51	76	20.99	20.78	0.21	0	64	0.041	0.22	0.179	0	0.842	0.4	0.6	OVERLOAD	0	0	0	0	0	0	0
	2018-08-16 10:41:06	78	20.99	20.77	0.21	0	65	0.041	0.222	0.181	0	0.83	0.4	0.6	OVERLOAD	0	0	0	0	0	0	0
	2018-08-16 10:41:21	77	20.99	20.78	0.21	0	64	0.041	0.22	0.179	0	0.83	0.4	0.6	OVERLOAD	0	0	0	0	0	0	0
	2018-08-16 10:41:36	77	20.99	20.78	0.21	0	64	0.041	0.219	0.178	0	0.828	0.4	0.6	OVERLOAD	0	0	0	0	0	0	0
	2018-08-16 10:41:51	72	20.99	20.79	0.19	0	61	0.041	0.211	0.169	0	0.848	0.3	0.6	OVERLOAD	0	0	0	0	0	0	0
	2018-08-16 10:42:06	78	20.99	20.78	0.21	0	65	0.041	0.224	0.183	0	0.839	0.4	0.6	OVERLOAD	0	0	0	0	0	0	0
	2018-08-16 10:42:21	77	20.99	20.78	0.21	0	66	0.041	0.227	0.185	0	0.86	0.4	0.6	OVERLOAD	0	0	0	0	0	0	0
	2018-08-16 10:42:36	78	20.99	20.78	0.21	0	64	0.041	0.22	0.179	0	0.821	0.4	0.6	OVERLOAD	0	0	0	0	0	0	0
	2018-08-16 10:42:51	65	20.99	20.81	0.17	0	48	0.041	0.175	0.134	0	0.737	0.3	0.6	OVERLOAD	0	0	0	0	0	0	0
	2018-08-16 10:43:06	49	20.99	20.86	0.13	0	38	0.041	0.147	0.106	0	0.78	0.2	0.6	OVERLOAD	0	0	0	0	0	0	0
	2018-08-16 10:43:21	55	20.99	20.84	0.15	0	47	0.041	0.173	0.132	0	0.861	0.3	0.6	OVERLOAD	0	0	0	0	0	0	0
	2018-08-16 10:43:36	64	20.99	20.81	0.17	0	55	0.041	0.195	0.153	0	0.859	0.3	0.6	OVERLOAD	0	0	0	0	0	0	0
	2018-08-16 10:43:51	72	20.99	20.79	0.2	0	62	0.041	0.214	0.173	0	0.857	0.4	0.6	OVERLOAD	0	0	0	0	0	0	0
	2018-08-16 10:44:06	78	20.99	20.78	0.21	0	64	0.041	0.22	0.179	0	0.816	0.4	0.6	OVERLOAD	0	0	0	0	0	0	0
	2018-08-16 10:44:21	69	20.99	20.8	0.18	0	54	0.041	0.192	0.151	0	0.784	0.3	0.6	OVERLOAD	0	0	0	0	0	0	0
	2018-08-16 10:44:36	67	20.99	20.8	0.18	0	56	0.041	0.197	0.156	0	0.832	0.3	0.6	OVERLOAD	0	0	0	0	0	0	0
	2018-08-16 10:44:51	71	20.99	20.79	0.19	0	60	0.041	0.209	0.168	0	0.846	0.3	0.6	OVERLOAD	0	0	0	0	0	0	0
	2018-08-16 10:45:06	76	20.99	20.78	0.21	0	63	0.041	0.218	0.177	0	0.831	0.4	0.6	OVERLOAD	0	0	0	0	0	0	0
5 meter/min	2018-08-16 10:45:21	77	20.99	20.78	0.21	0	64	0.041	0.22	0.179	0	0.834	0.4	0.6	OVERLOAD	0	0	0	0	0	0	0
	2018-08-16 10:45:36	88	20.99	20.75	0.24	0	75	0.041	0.25	0.208	0	0.85	0.4	0.6	OVERLOAD	0	0	0	0	0	0	0
	2018-08-16 10:45:51	97	20.99	20.72	0.26	0	81	0.041	0.267	0.226	0	0.833	0.5	0.6	OVERLOAD	0	0	0	0	0	0	0
	2018-08-16 10:46:06	106	20.99	20.7	0.29	0	92	0.041	0.298	0.257	0	0.867	0.5	0.6	OVERLOAD	0	0	0	0	0	0	0
	2018-08-16 10:46:21	112	20.99	20.68	0.31	0	98	0.041	0.316	0.275	0	0.877	0.5	0.6	OVERLOAD	0	0	0	0	0	0	0
	2018-08-16 10:46:36	118	20.99	20.66	0.32	0	105	0.041	0.335	0.294	0	0.89	0.6	0.6	OVERLOAD	0	0	0	0	0	0	0
	2018-08-16 10:46:51	123	20.99	20.65	0.34	0	110	0.041	0.347	0.306	0	0.887	0.6	0.6	OVERLOAD	0	0	0	0	0	0	0
	2018-08-16 10:47:06	128	20.99	20.64	0.35	0	115	0.041	0.361	0.32	0	0.897	0.6	0.6	OVERLOAD	0	0	0	0	0	0	0
10 meter/min	2018-08-16 10:47:21	139	20.99	20.61	0.38	0	123	0.041	0.385	0.344	0	0.886	0.7	0.6	OVERLOAD	0	0	0	0	0	0	0
	2018-08-16 10:47:36	144	20.99	20.59	0.39	0	125	0.041	0.392	0.35	0	0.874	0.7	0.6	OVERLOAD	0	0	0	0	0	0	0
	2018-08-16 10:47:51	147	20.99	20.59	0.4	0	128	0.041	0.399	0.357	0	0.87	0.7	0.6	OVERLOAD	0	0	0	0	0	0	0
	2018-08-16 10:48:06	151	20.99	20.58	0.41	0	129	0.041	0.401	0.36	0	0.854	0.7	0.6	OVERLOAD	0	0	0	0	0	0	0
	2018-08-16 10:48:21	153	20.99	20.57	0.41	0	129	0.041	0.401	0.36	0	0.845	0.7	0.6	OVERLOAD	0	0	0	0	0	0	0
	2018-08-16 10:48:36	154	20.99	20.57	0.41	0	128	0.041	0.399	0.357	0	0.831	0.7	0.6	OVERLOAD	0	0	0	0	0	0	0
	2018-08-16 10:48:51	154	20.99	20.57	0.41	0	127	0.041	0.396	0.354	0	0.824	0.7	0.6	OVERLOAD	0	0	0	0	0	0	0
	2018-08-16 10:49:06	155	20.99	20.57	0.42	0	127	0.041	0.395	0.354	0	0.818	0.7	0.6	OVERLOAD	0	0	0	0	0	0	0
15 meter/min	2018-08-16 10:49:21	155	20.99	20.57	0.42	0	125	0.041	0.389	0.348	0	0.802	0.7	0.6	OVERLOAD	0	0	0	0	0	0	0
	2018-08-16 10:49:36	153	20.99	20.58	0.41	0	123	0.041	0.385	0.343	0	0.803	0.7	0.6	OVERLOAD	0	0	0	0	0	0	0
	2018-08-16 10:49:51	158	20.99	20.56	0.42	0	126	0.041	0.393	0.352	0	0.795	0.8	0.6	OVERLOAD	0	0	0	0	0	0	0
	2018-08-16 10:50:06	160	20.99	20.56	0.43	0	126	0.041	0.393	0.351	0	0.786	0.8	0.6	OVERLOAD	0	0	0	0	0	0	0
	2018-08-16 10:50:21	160	20.99	20.56	0.43	0	125	0.041	0.391	0.349	0	0.78	0.8	0.6	OVERLOAD	0	0	0	0	0	0	0
	2018-08-16 10:50:36	160	20.99	20.56	0.43	0	125	0.041	0.39	0.349	0	0.778	0.8	0.6	OVERLOAD	0	0	0	0	0	0	0
	2018-08-16 10:50:51	160	20.99	20.56	0.43	0	124	0.041	0.387	0.346	0	0.772	0.8	0.6	OVERLOAD	0	0	0	0	0	0	0
	2018-08-16 10:51:06	159	20.99	20.56	0.42	0	122	0.041	0.383	0.342	0	0.769	0.8	0.6	OVERLOAD	0	0	0	0	0	0	0
20 meter/min	2018-08-16 10:51:21	158	20.99	20.57	0.42	0	121	0.041	0.378	0.337	0	0.763	0.8	0.6	OVERLOAD	0	0	0	0	0	0	0
	2018-08-16 10:51:36	156	20.99	20.57	0.41	0	119	0.041	0.374	0.333	0	0.762	0.7	0.6	OVERLOAD	0	0	0	0	0	0	0
	2018-08-16 10:51:51	155	20.99	20.57	0.41	0	118	0.041	0.372	0.331	0	0.763	0.7	0.6	OVERLOAD	0	0	0	0	0	0	0
	2018-08-16 10:52:06	157	20.99	20.57	0.42	0	120	0.041	0.376	0.334	0	0.763	0.7	0.6	OVERLOAD	0	0	0	0	0	0	0
	2018-08-16 10:52:21	159	20.99	20.56	0.42	0	124	0.041	0.387	0.346	0	0.777	0.8	0.6	OVERLOAD	0	0	0	0	0	0	0
	2018-08-16 10:52:36	163	20.99	20.55	0.43	0	129	0.041	0.402	0.361	0	0.794	0.8	0.6	OVERLOAD	0	0	0	0	0	0	0
	2018-08-16 10:52:51	165	20.99	20.54	0.44	0	132	0.041	0.41	0.369	0	0.801	0.8	0.6	OVERLOAD	0	0	0	0	0	0	0
	2018-08-16 10:53:06	166	20.99	20.54	0.45	0	134	0.041	0.416	0.375	0	0.807	0.8	0.6	OVERLOAD	0	0	0	0	0	0	0
20 meter/min & 5 degrees	2018-08-16 10:53:21	168	20.99	20.53	0.45	0	137	0.041	0.423	0.382	0	0.813	0.8	0.6	OVERLOAD	0	0	0	0	0	0	0
	2018-08-16 10:53:36	168	20.99	20.53	0.45	0	137	0.041	0.424	0.383	0	0.817	0.8	0.6	OVERLOAD	0	0	0	0	0	0	0
	2018-08-16 10:53:51	166	20.99	20.54	0.45	0	137	0.041	0.424	0.382	0	0.822	0.8	0.6	OVERLOAD	0	0	0	0	0	0	0
	2018-08-16 10:54:06	166	20.99	20.54	0.45	0	136	0.041	0.422	0.381	0	0.819	0.8	0.6	OVERLOAD	0	0	0	0	0	0	0
	2018-08-16 10:54:21	165	20.99	20.54	0.44	0	135	0.041	0.418	0.376	0	0.817	0.8	0.6	OVERLOAD	0	0	0	0	0	0	0
	2018-08-16 10:54:36	165	20.99	20.54	0.44	0	135	0.041	0.418	0.376	0	0.818	0.8	0.6	OVERLOAD	0	0	0	0	0	0	0
	2018-08-16 10:54:51	166	20.99	20.54	0.45	0	135	0.041	0.418	0.376	0	0.811	0.8	0.6	OVERLOAD	0	0	0	0	0	0	0
	2018-08-16 10:55:06	166	20.99	20.54	0.45	0	134	0.041	0.416	0.375	0	0.807	0.8	0.6	OVERLOAD	0	0	0	0	0	0	0
20 meter/min & 10 degrees	2018-08-16 10:55:21	165	20.99	20.54	0.44	0	133	0.041	0.413	0.372	0	0.807	0.8	0.6	OVERLOAD	0	0	0	0	0	0	0
	2018-08-16 10:55:36	165	20.99	20.54	0.44	0	133	0.041	0.412	0.37	0	0.805	0.8	0.6	OVERLOAD	0	0	0	0	0	0	0
	2018-08-16 10:55:51	165	20.99	20.54	0.44	0	132	0.041	0.41	0.369	0	0.799	0.8	0.6	OVERLOAD	0	0	0	0	0	0	0
	2018-08-16 10:56:06	165	20.99	20.54	0.44	0	132	0.041	0.411	0.369	0	0.802	0.8	0.6	OVERLOAD	0	0	0	0	0	0	0
	2018-08-16 10:56:21	166	20.99	20.54	0.45	0	133	0.041	0.413	0.372	0	0.8	0.8	0.6	OVERLOAD	0	0	0	0	0	0	0
	2018-08-16 10:56:36	167	20.99	20.54	0.45	0	133	0.041	0.414	0.373	0	0.798	0.8	0.6	OVERLOAD	0	0	0	0	0	0	0
	2018-08-16 10:56:51	167	20.99	20.54	0.45	0	133	0.041	0.412	0.37	0	0.795	0.8	0.6	OVERLOAD	0	0	0	0	0	0	0
	2018-08-16 10:57:06	166	20.99	20.54	0.44	0	132	0.041	0.41	0.369	0	0.795	0.8	0.6	OVERLOAD	0	0	0	0	0	0	0
20 meter/min & 15 degrees	2018-08-16 10:57:21	166	20.99	20.54	0.44	0	132	0.041	0.409	0.368	0	0.792	0.8	0.6	OVERLOAD	0	0	0	0	0	0	0
	2018-08-16 10:57:36	166	20.99	20.54	0.44	0	131	0.041	0.407	0.366	0	0.789	0.8	0.6	OVERLOAD	0	0	0	0	0	0	0
	2018-08-16 10:57:51	165	20.99	20.54	0.44	0	131	0.041	0.408	0.366	0	0.794	0.8	0.6	OVERLOAD	0	0	0	0	0	0	0
	2018-08-16 10:58:06	166	20.99	20.54	0.45	0	133	0.041	0.413	0.372	0	0.799	0.8	0.6	OVERLOAD	0	0	0	0	0	0	0
	2018-08-16 10:58:21	168	20.99	20.53	0.45	0	135	0.041	0.418	0.377	0	0.802	0.8	0.6	OVERLOAD	0	0	0	0	0	0	0
	2018-08-16 10:58:36	169	20.99	20.53	0.45	0	136	0.041	0.422	0.38	0	0.806	0.8	0.6	OVERLOAD	0	0	0	0	0	0	0
	2018-08-16 10:58:51	168	20.99	20.53	0.45	0	136	0.041	0.42	0.379	0	0.806	0.8	0.6	OVERLOAD	0	0	0	0	0	0	0
	2018-08-16 10:59:06	168	20.99	20.54	0.45	0	135	0.041	0.419	0.377	0	0.804	0.8	0.6	OVERLOAD	0	0	0	0	0	0	0
20 meter/min & 20 degrees	2018-08-16 10:59:21	168	20.99	20.54	0.45	0	135	0.041	0.417	0.376	0	0.803	0.8	0.6	OVERLOAD	0	0	0	0	0	0	0
	2018-08-16 10:59:36	167	20.99	20.54	0.45	0	134	0.041	0.416	0.374	0	0.802	0.8	0.6	OVERLOAD	0	0	0	0	0	0	0
	2018-08-16 10:59:51	167	20.99	20.54	0.45	0	133	0.041	0.414	0.373	0	0.799	0.8	0.6	OVERLOAD	0	0	0	0	0	0	0
	2018-08-16 11:00:06	166	20.99	20.54	0.45	0	133	0.041	0.412	0.371	0	0.797	0.8	0.6	OVERLOAD	0	0	0	0	0	0	0
	2018-08-16 11:00:21	166	20.99	20.54	0.44	0	132	0.041	0.41	0.369	0	0.795	0.8	0.6	OVERLOAD	0	0	0	0	0	0	0
	2018-08-16 11:00:36	166	20.99	20.54	0.44	0	133	0.041	0.412	0.371	0	0.798	0.8	0.6	OVERLOAD	0	0	0	0	0	0	0
	2018-08-16 11:00:51	167	20.99	20.54	0.45	0	133	0.041	0.412	0.371	0	0.797	0.8	0.6	OVERLOAD	0	0	0	0	0	0	0
	2018-08-16 11:01:06	167	20.99	20.54	0.45	0	132	0.041	0.411	0.37	0	0.792	0.8	0.6	OVERLOAD	0	0	0	0	0	0	0
20 meter/min & 25 degrees	2018-08-16 11:01:21	166	20.99	20.54	0.44	0	132	0.041	0.409	0.368	0	0.792	0.8	0.6	OVERLOAD	0	0	0	0	0	0	0
	2018-08-16 11:01:36	166	20.99	20.54	0.44	0	131	0.041	0.408	0.367	0	0.791	0.8	0.6	OVERLOAD	0	0	0	0	0	0	0
	2018-08-16 11:01:51	166	20.99	20.54	0.44	0	132	0.041	0.409	0.368	0	0.793	0.8	0.6	OVERLOAD	0	0	0	0	0	0	0
	2018-08-16 11:02:06	167	20.99	20.54	0.45	0.1	133	0.041	0.413	0.371	0	0.796	0.8	0.6	OVERLOAD	0	0	0	0	0	0	0
	2018-08-16 11:02:21	168	20.99	20.54	0.45	0.1	133	0.041	0.414	0.373	0	0.794	0.8	0.6	OVERLOAD	0	0	0	0	0	0	0
	2018-08-16 11:02:36	168	20.99	20.54	0.45	0.1	134	0.041	0.415	0.374	0	0.796	0.8	0.6	OVERLOAD	0	0	0	0	0	0	0
	2018-08-16 11:02:51	171	20.99	20.53	0.46	0.1	137	0.041	0.424	0.383	0	0.803	0.8	0.6	OVERLOAD	0	0	0	0	0	0	0
	2018-08-16 11:03:06	173	20.99	20.52	0.46	0.1	140	0.041	0.433	0.392	0	0.811	0.8	0.6	OVERLOAD	0	0	0	0	0	0	0
20 meter/min & 25 degrees	2018-08-16 11:03:21	174	20.99	20.52	0.47	0.1	143	0.041	0.441	0.4	0	0.825	0.8	0.6	OVERLOAD	0	0	0	0	0	0	0
	2018-08-16 11:03:36	174	20.99	20.52	0.47	0.1	144	0.041	0.444	0.402	0	0.827	0.8	0.6	OVERLOAD	0	0	0	0	0	0	0
	2018-08-16 11:03:51	173	20.99	20.52	0.46	0.1	143	0.041	0.44	0.399	0	0.827	0.8	0.6	OVERLOAD	0	0	0	0	0	0	0
	2018-08-16 11:04:06	172	20.99	20.52	0.46	0.1	142	0.041	0.437	0.396	0	0.822	0.8	0.6	OVERLOAD	0	0	0	0	0	0	0
	2018-08-16 11:04:21	171	20.99	20.53	0.46	0.1	140	0.041	0.433	0.392	0	0.821	0.8	0.6	OVERLOAD	0	0	0	0	0	0	0
	2018-08-16 11:04:36	170	20.99	20.53	0.46	0.1	139	0.041	0.429	0.388	0	0.816	0.8	0.6	OVERLOAD	0	0	0	0	0	0	0
	2018-08-16 11:04:51	170	20.99	20.53	0.46	0.1	139	0.041	0.429	0.387	0	0.815	0.8	0.6	OVERLOAD	0	0	0	0	0	0	0
	2018-08-16 11:05:06	170	20.99	20.53	0.46	0.1	138	0.041	0.426	0.385	0	0.811	0.8	0.6	OVERLOAD	0	0	0	0	0	0	0
20 meter/min & 25 degrees	2018-08-16 11:05:21	168	20.99	20.53	0.45	0.1	136	0.041	0.423	0.381	0	0.81	0.8	0.6	OVERLOAD	0	0	0	0	0	0	0
	2018-08-16 11:05:36	169	20.99	20.53	0.45	0.1	137	0.041	0.424	0.382	0	0.811	0.8	0.6	OVERLOAD	0	0	0	0	0	0	0
	2018-08-16 11:05:51	170	20.99	20.53	0.46	0.1	138	0.041	0.428	0.387	0	0.813	0.8	0.6	OVERLOAD	0	0	0	0	0	0	0
	2018-08-16 11:06:06	171	20.99	20.53	0.46	0.1	139	0.041	0.431	0.389	0	0.813	0.8	0.6	OVERLOAD	0	0	0	0	0	0	0
	2018-08-16 11:06:21	172	20.99	20.52	0.46	0.1	139	0.041	0.431	0.39	0.1	0.812	0.8	0.6	OVERLOAD	0	0	0	0	0	0	0
	2018-08-16 11:06:36	170	20.99	20.53	0.46	0.1	138	0.041	0.428	0.386	0.1	0.812	0.8	0.6	OVERLOAD	0	0	0	0	0	0	0
	2018-08-16 11:06:51	170	20.99	20.53	0.46	0.1	138	0.041	0.427	0.385	0.1	0.81	0.8	0.6	OVERLOAD	0	0	0	0	0	0	0
	2018-08-16 11:07:06	170	20.99	20.53	0.46	0.1	137	0.041	0.425	0.384	0.1	0.808	0.8	0.6	OVERLOAD	0	0	0	0	0	0	0
20 meter/min & 25 degrees	2018-08-16 11:07:21	169	20.99	20.53	0.45	0.1	137	0.041	0.424	0.382	0.1	0.807	0.8	0.6	OVERLOAD	0	0	0	0	0	0	0
	2018-08-16 11:07:36	169	20.99	20.53	0.45	0.1	136	0.041	0.42	0.379	0.1	0.802	0.8	0.6	OVERLOAD	0	0	0	0	0	0	0
	2018-08-16 11:07:51	167	20.99	20.54	0.45	0.1	135	0.041	0.417	0.376	0.1	0.804	0.8	0.6	OVERLOAD	0	0	0	0	0	0	0
	2018-08-16 11:08:06	168	20.99	20.54	0.45	0.1	135	0.041	0.418	0.377	0.1	0.805	0.8	0.6	OVERLOAD	0	0	0	0	0	0	0
	2018-08-16 11:08:21	168	20.99	20.54	0.45	0.1	135	0.041	0.417	0.376	0.1	0.801	0.8	0.6	OVERLOAD	0	0	0	0	0	0	0
	2018-08-16 11:08:36	168	20.99	20.54	0.45	0.1	134	0.041	0.417	0.376	0.1	0.799	0.8	0.6	OVERLOAD	0	0	0	0	0	0	0
	2018-08-16 11:08:51	168	20.99	20.54	0.45	0.1	134	0.041	0.416	0.374	0.1	0.798	0.8	0.6	OVERLOAD	0	0	0	0	0	0	0
	2018-08-16 11:09:06	167	20.99	20.54	0.45	0.1	134	0.041	0.415	0.374	0.1	0.8	0.8	0.6	OVERLOAD	0	0	0	0	0	0	0
20 meter/min & 25 degrees	2018-08-16 11:09:21	167	20.99	20.54	0.45	0.1	134	0.041	0.415	0.373	0.1	0.8	0.8	0.6	OVERLOAD	0	0	0	0	0	0	0
	2018-08-16 11:09:36	167	20.99	20.54	0.45	0.1	133	0.041	0.413	0.372	0.1	0.797	0.8	0.6	OVERLOAD	0	0	0	0	0	0	0
	2018-08-16 11:09:51	168	20.99	20.54	0.45	0.1	135	0.041	0.418	0.377	0.1	0.803	0.8	0.6	OVERLOAD	0	0	0	0	0	0	0
	2018-08-16 11:10:06	171	20.99	20.53	0.46	0.1	139	0.041	0.431	0.39	0.1	0.816	0.8	0.6	OVERLOAD	0	0	0	0	0	0	0
	2018-08-16 11:10:21	174	20.99	20.52	0.47	0.1	146	0.041	0.448	0.407	0.1	0.836	0.8	0.6	OVERLOAD	0	0	0	0	0	0	0
	2018-08-16 11:10:36	176	20.99	20.51	0.48	0.1	149	0.041	0.458	0.417	0.1	0.848	0.9	0.6	OVERLOAD	0	0	0	0	0	0	0
	2018-08-16 11:10:51	176	20.99	20.51	0.48	0.1	149	0.041	0.459	0.418	0.1	0.85	0.9	0.6	OVERLOAD	0	0	0	0	0	0	0
	2018-08-16 11:11:06	174	20.99	20.51	0.47	0.1	148	0.041	0.455	0.414	0.1	0.852	0.8	0.6	OVERLOAD	0	0	0	0	0	0	0
20 meter/min & 25 degrees	2018-08-16 11:11:21	174	20.99	20.52	0.47	0.1	147	0.041	0.452	0.411	0.1	0.846	0.8	0.6	OVERLOAD	0	0	0	0	0	0	0
	2018-08-16 11:11:36	172	20.99	20.52	0.47	0.1	145	0.041	0.447	0.406	0.1	0.842	0.8	0.6	OVERLOAD	0	0	0	0	0	0	0
	2018-08-16 11:11:51	172	20.99	20.52	0.46	0.1	144	0.041	0.443	0.402	0.1	0.838	0.8	0.6	OVERLOAD	0	0	0	0	0	0	0
	2018-08-16 11:12:06	171	20.99	20.53	0.46	0.1	142	0.041	0.438	0.397	0.1	0.831	0.8	0.6	OVERLOAD	0	0	0	0	0	0	0
	2018-08-16 11:12:21	170	20.99	20.53	0.46	0.1	140	0.041	0.433	0.392	0.1	0.826	0.8	0.6	OVERLOAD	0	0	0	0	0	0	0
	2018-08-16 11:12:36	172	20.99	20.52	0.46	0.1	143	0.041	0.44	0.398	0.1	0.83	0.8	0.6	OVERLOAD	0	0	0	0	0	0	0
	2018-08-16 11:12:51	178	20.99	20.5	0.48	0.1	151	0.041	0.463	0.422	0.1	0.849	0.9	0.6	OVERLOAD	0	0	0	0	0	0	0
	2018-08-16 11:13:06	182	20.99	20.49	0.49	0.1	157	0.041	0.48	0.439	0.1	0.864	0.9	0.6	OVERLOAD	0	0	0	0	0	0	0
20 meter/min & 25 degrees	2018-08-16 11:13:21	185	20.99	20.48	0.51	0.1	165	0.041	0.503	0.462	0.1	0.894	0.9	0.6	OVERLOAD	0	0	0	0	0	0	0
	2018-08-16 11:13:36	185	20.99	20.48	0.51	0.1	169	0.041	0.514	0.473	0.1	0.912	0.9	0.6	OVERLOAD	0	0	0	0	0	0	0
	2018-08-16 11:13:51	185	20.99	20.48	0.51	0.1	171	0.041	0.519	0.478	0.1	0.923	0.9	0.6	OVERLOAD	0	0	0	0	0	0	0
	2018-08-16 11:14:06	184	20.99	20.48	0.51	0.1	170	0.041	0.516	0.474	0.1	0.923	0.9	0.6	OVERLOAD	0	0	0	0	0	0	0
	2018-08-16 11:14:21	183	20.99	20.48	0.5	0.1	168	0.041	0.511	0.469	0.1	0.919	0.9	0.6	OVERLOAD	0	0	0	0	0	0	0
	2018-08-16 11:14:36	181	20.99	20.49	0.5	0.1	165	0.041	0.502	0.46	0.1	0.909	0.9	0.6	OVERLOAD	0	0	0	0	0	0	0
	2018-08-16 11:14:51	183	20.99	20.49	0.5	0.1	164	0.041	0.5	0.459	0.1	0.9	0.9	0.6	OVERLOAD	0	0	0	0	0	0	0
	2018-08-16 11:15:06	189	20.99	20.47	0.52	0.1	169	0.041	0.513	0.472	0.1	0.896	0.9	0.6	OVERLOAD	0	0	0	0	0	0	0

## Sheet: 5-P1186
	Subject ID	5-P1186
	Weight(g)	22.31
	Sex	Male
	Genotype
	Diet	Chow
===============	===============	===============	===============	===============	===============	===============	===============	===============	===============	===============	===============	===============	===============	===============	===============	===============	===============	===============	===============	===============	===============	===============
	DATE/TIME	VO2	O2IN	O2OUT	DO2	ACCO2	VCO2	CO2IN	CO2OUT	DCO2	ACCCO2	RER	HEAT	FLOW	STATUS1	FEED1	FEED1 ACC	DRINK1	DRINK1 ACC	XTOT	XAMB	ZTOT
===============		ml/hr	%	%		l	ml/hr	%	%		l		kcal/hr	LPM		GRAMS	GRAMS	ml	ml	COUNTS	COUNTS	COUNTS
Basal	2018-08-16 12:27:20	76	20.99	20.78	0.2	0	61	0.041	0.211	0.17	0	0.801	0.4	0.6	CHECKSUM ERROR	0	0	0	0	0	0	0
	2018-08-16 12:27:35	82	20.99	20.77	0.22	0	65	0.041	0.222	0.181	0	0.794	0.4	0.6	CHECKSUM ERROR	0	0	0	0	0	0	0
	2018-08-16 12:27:50	83	20.99	20.76	0.22	0	68	0.041	0.231	0.19	0	0.819	0.4	0.6	CHECKSUM ERROR	0	0	0	0	0	0	0
	2018-08-16 12:28:05	96	20.99	20.73	0.26	0	78	0.041	0.258	0.217	0	0.807	0.5	0.6	CHECKSUM ERROR	0	0	0	0	0	0	0
	2018-08-16 12:28:20	99	20.99	20.72	0.26	0	76	0.041	0.253	0.212	0	0.768	0.5	0.6	CHECKSUM ERROR	0	0	0	0	0	0	0
	2018-08-16 12:28:35	72	20.99	20.8	0.19	0	48	0.041	0.176	0.135	0	0.672	0.3	0.6	CHECKSUM ERROR	0	0	0	0	0	0	0
	2018-08-16 12:28:50	64	20.99	20.81	0.17	0	55	0.041	0.194	0.153	0	0.856	0.3	0.6	CHECKSUM ERROR	0	0	0	0	0	0	0
	2018-08-16 12:29:05	80	20.99	20.77	0.21	0	64	0.041	0.22	0.179	0	0.804	0.4	0.6	CHECKSUM ERROR	0	0	0	0	0	0	0
	2018-08-16 12:29:20	78	20.99	20.78	0.21	0	61	0.041	0.21	0.17	0	0.778	0.4	0.6	CHECKSUM ERROR	0	0	0	0	0	0	0
	2018-08-16 12:29:35	78	20.99	20.78	0.21	0	64	0.041	0.219	0.178	0	0.823	0.4	0.6	CHECKSUM ERROR	0	0	0	0	0	0	0
	2018-08-16 12:29:50	77	20.99	20.78	0.21	0	62	0.041	0.213	0.172	0	0.8	0.4	0.6	CHECKSUM ERROR	0	0	0	0	0	0	0
	2018-08-16 12:30:05	80	20.99	20.77	0.21	0	65	0.041	0.221	0.18	0	0.805	0.4	0.6	CHECKSUM ERROR	0	0	0	0	0	0	0
	2018-08-16 12:30:20	79	20.99	20.77	0.21	0	63	0.041	0.217	0.176	0	0.794	0.4	0.6	CHECKSUM ERROR	0	0	0	0	0	0	0
	2018-08-16 12:30:35	82	20.99	20.77	0.22	0	66	0.041	0.224	0.183	0	0.805	0.4	0.6	CHECKSUM ERROR	0	0	0	0	0	0	0
	2018-08-16 12:30:50	86	20.99	20.76	0.23	0	69	0.041	0.233	0.192	0	0.799	0.4	0.6	CHECKSUM ERROR	0	0	0	0	0	0	0
	2018-08-16 12:31:05	85	20.99	20.76	0.23	0	67	0.041	0.227	0.187	0	0.786	0.4	0.6	CHECKSUM ERROR	0	0	0	0	0	0	0
	2018-08-16 12:31:20	87	20.99	20.75	0.23	0	69	0.041	0.234	0.193	0	0.799	0.4	0.6	CHECKSUM ERROR	0	0	0	0	0	0	0
	2018-08-16 12:31:35	79	20.99	20.78	0.21	0	60	0.041	0.207	0.166	0	0.758	0.4	0.6	CHECKSUM ERROR	0	0	0	0	0	0	0
	2018-08-16 12:31:50	66	20.99	20.81	0.18	0	50	0.041	0.181	0.14	0	0.76	0.3	0.6	CHECKSUM ERROR	0	0	0	0	0	0	0
	2018-08-16 12:32:05	68	20.99	20.8	0.18	0	57	0.041	0.199	0.158	0	0.837	0.3	0.6	CHECKSUM ERROR	0	0	0	0	0	0	0
5 meter/min	2018-08-16 12:32:20	75	20.99	20.78	0.2	0	65	0.041	0.223	0.182	0	0.872	0.4	0.6	CHECKSUM ERROR	0	0	0	0	0	0	0
	2018-08-16 12:32:35	88	20.99	20.75	0.24	0	75	0.041	0.25	0.209	0	0.852	0.4	0.6	CHECKSUM ERROR	0	0	0	0	0	0	0
	2018-08-16 12:32:50	105	20.99	20.7	0.28	0	87	0.041	0.284	0.243	0	0.83	0.5	0.6	CHECKSUM ERROR	0	0	0	0	0	0	0
	2018-08-16 12:33:05	118	20.99	20.67	0.32	0	98	0.041	0.313	0.272	0	0.828	0.6	0.6	CHECKSUM ERROR	0	0	0	0	0	0	0
	2018-08-16 12:33:20	122	20.99	20.66	0.33	0	103	0.041	0.329	0.288	0	0.847	0.6	0.6	CHECKSUM ERROR	0	0	0	0	0	0	0
	2018-08-16 12:33:35	126	20.99	20.65	0.34	0	108	0.041	0.343	0.303	0	0.862	0.6	0.6	CHECKSUM ERROR	0	0	0	0	0	0	0
	2018-08-16 12:33:50	130	20.99	20.63	0.35	0	113	0.041	0.357	0.316	0	0.871	0.6	0.6	CHECKSUM ERROR	0	0	0	0	0	0	0
	2018-08-16 12:34:05	135	20.99	20.62	0.37	0	118	0.041	0.37	0.329	0	0.87	0.7	0.6	CHECKSUM ERROR	0	0	0	0	0	0	0
10 meter/min	2018-08-16 12:34:20	137	20.99	20.61	0.37	0	118	0.041	0.371	0.33	0	0.861	0.7	0.6	CHECKSUM ERROR	0	0	0	0	0	0	0
	2018-08-16 12:34:35	139	20.99	20.61	0.38	0	120	0.041	0.375	0.334	0	0.863	0.7	0.6	CHECKSUM ERROR	0	0	0	0	0	0	0
	2018-08-16 12:34:50	145	20.99	20.59	0.39	0	123	0.041	0.385	0.344	0	0.851	0.7	0.6	CHECKSUM ERROR	0	0	0	0	0	0	0
	2018-08-16 12:35:05	149	20.99	20.58	0.4	0	125	0.041	0.391	0.35	0	0.839	0.7	0.6	CHECKSUM ERROR	0	0	0	0	0	0	0
	2018-08-16 12:35:20	150	20.99	20.58	0.4	0	125	0.041	0.389	0.348	0	0.83	0.7	0.6	CHECKSUM ERROR	0	0	0	0	0	0	0
	2018-08-16 12:35:35	151	20.99	20.58	0.41	0	124	0.041	0.388	0.347	0	0.823	0.7	0.6	CHECKSUM ERROR	0	0	0	0	0	0	0
	2018-08-16 12:35:50	151	20.99	20.58	0.41	0	124	0.041	0.387	0.347	0	0.822	0.7	0.6	CHECKSUM ERROR	0	0	0	0	0	0	0
	2018-08-16 12:36:05	151	20.99	20.58	0.41	0	123	0.041	0.385	0.344	0	0.813	0.7	0.6	CHECKSUM ERROR	0	0	0	0	0	0	0
15 meter/min	2018-08-16 12:36:20	150	20.99	20.58	0.4	0	122	0.041	0.382	0.341	0	0.813	0.7	0.6	CHECKSUM ERROR	0	0	0	0	0	0	0
	2018-08-16 12:36:35	151	20.99	20.58	0.41	0	123	0.041	0.383	0.342	0	0.811	0.7	0.6	CHECKSUM ERROR	0	0	0	0	0	0	0
	2018-08-16 12:36:50	153	20.99	20.58	0.41	0	123	0.041	0.386	0.345	0	0.807	0.7	0.6	CHECKSUM ERROR	0	0	0	0	0	0	0
	2018-08-16 12:37:05	153	20.99	20.58	0.41	0	122	0.041	0.383	0.342	0	0.802	0.7	0.6	CHECKSUM ERROR	0	0	0	0	0	0	0
	2018-08-16 12:37:20	152	20.99	20.58	0.41	0	122	0.041	0.382	0.341	0	0.803	0.7	0.6	CHECKSUM ERROR	0	0	0	0	0	0	0
	2018-08-16 12:37:35	152	20.99	20.58	0.41	0	121	0.041	0.38	0.339	0	0.799	0.7	0.6	CHECKSUM ERROR	0	0	0	0	0	0	0
	2018-08-16 12:37:50	152	20.99	20.58	0.41	0	121	0.041	0.378	0.338	0	0.796	0.7	0.6	CHECKSUM ERROR	0	0	0	0	0	0	0
	2018-08-16 12:38:05	151	20.99	20.58	0.4	0	120	0.041	0.375	0.334	0	0.795	0.7	0.6	CHECKSUM ERROR	0	0	0	0	0	0	0
20 meter/min	2018-08-16 12:38:20	150	20.99	20.59	0.4	0	120	0.041	0.375	0.334	0	0.8	0.7	0.6	CHECKSUM ERROR	0	0	0	0	0	0	0
	2018-08-16 12:38:35	149	20.99	20.59	0.4	0	122	0.041	0.381	0.341	0	0.819	0.7	0.6	CHECKSUM ERROR	0	0	0	0	0	0	0
	2018-08-16 12:38:50	152	20.99	20.58	0.41	0	123	0.041	0.385	0.344	0	0.811	0.7	0.6	CHECKSUM ERROR	0	0	0	0	0	0	0
	2018-08-16 12:39:05	149	20.99	20.58	0.4	0	123	0.041	0.384	0.343	0	0.822	0.7	0.6	CHECKSUM ERROR	0	0	0	0	0	0	0
	2018-08-16 12:39:20	149	20.99	20.58	0.4	0	123	0.041	0.386	0.345	0	0.827	0.7	0.6	CHECKSUM ERROR	0	0	0	0	0	0	0
	2018-08-16 12:39:35	150	20.99	20.58	0.4	0	126	0.041	0.392	0.351	0	0.839	0.7	0.6	CHECKSUM ERROR	0	0	0	0	0	0	0
	2018-08-16 12:39:50	151	20.99	20.58	0.41	0	127	0.041	0.397	0.356	0	0.843	0.7	0.6	CHECKSUM ERROR	0	0	0	0	0	0	0
	2018-08-16 12:40:05	151	20.99	20.58	0.41	0	128	0.041	0.399	0.358	0	0.851	0.7	0.6	CHECKSUM ERROR	0	0	0	0	0	0	0
20 meter/min & 5 degrees	2018-08-16 12:40:20	151	20.99	20.58	0.41	0	128	0.041	0.399	0.358	0	0.851	0.7	0.6	CHECKSUM ERROR	0	0	0	0	0	0	0
	2018-08-16 12:40:35	148	20.99	20.58	0.4	0	128	0.041	0.397	0.356	0	0.859	0.7	0.6	CHECKSUM ERROR	0	0	0	0	0	0	0
	2018-08-16 12:40:50	148	20.99	20.58	0.4	0	127	0.041	0.396	0.356	0	0.858	0.7	0.6	CHECKSUM ERROR	0	0	0	0	0	0	0
	2018-08-16 12:41:05	153	20.99	20.57	0.41	0	130	0.041	0.403	0.363	0	0.851	0.7	0.6	CHECKSUM ERROR	0	0	0	0	0	0	0
	2018-08-16 12:41:20	152	20.99	20.57	0.41	0	132	0.041	0.41	0.369	0	0.868	0.7	0.6	CHECKSUM ERROR	0	0	0	0	0	0	0
	2018-08-16 12:41:35	152	20.99	20.57	0.41	0	132	0.041	0.41	0.37	0	0.869	0.7	0.6	CHECKSUM ERROR	0	0	0	0	0	0	0
	2018-08-16 12:41:50	152	20.99	20.57	0.41	0	133	0.041	0.412	0.371	0	0.872	0.7	0.6	CHECKSUM ERROR	0	0	0	0	0	0	0
	2018-08-16 12:42:05	153	20.99	20.57	0.41	0	133	0.041	0.413	0.372	0	0.873	0.7	0.6	CHECKSUM ERROR	0	0	0	0	0	0	0
20 meter/min & 10 degrees	2018-08-16 12:42:20	153	20.99	20.57	0.41	0	133	0.041	0.411	0.37	0	0.869	0.7	0.6	CHECKSUM ERROR	0	0	0	0	0	0	0
	2018-08-16 12:42:35	152	20.99	20.57	0.41	0	132	0.041	0.41	0.369	0	0.868	0.7	0.6	CHECKSUM ERROR	0	0	0	0	0	0	0
	2018-08-16 12:42:50	153	20.99	20.57	0.41	0	133	0.041	0.413	0.372	0	0.873	0.7	0.6	CHECKSUM ERROR	0	0	0	0	0	0	0
	2018-08-16 12:43:05	154	20.99	20.57	0.42	0	135	0.041	0.417	0.376	0	0.874	0.8	0.6	CHECKSUM ERROR	0	0	0	0	0	0	0
	2018-08-16 12:43:20	156	20.99	20.56	0.42	0	137	0.041	0.423	0.382	0	0.88	0.8	0.6	CHECKSUM ERROR	0	0	0	0	0	0	0
	2018-08-16 12:43:35	158	20.99	20.56	0.43	0	140	0.041	0.43	0.39	0	0.883	0.8	0.6	CHECKSUM ERROR	0	0	0	0	0	0	0
	2018-08-16 12:43:50	159	20.99	20.55	0.43	0	141	0.041	0.435	0.394	0	0.89	0.8	0.6	CHECKSUM ERROR	0	0	0	0	0	0	0
	2018-08-16 12:44:05	161	20.99	20.55	0.44	0	144	0.041	0.443	0.402	0	0.895	0.8	0.6	CHECKSUM ERROR	0	0	0	0	0	0	0
20 meter/min & 15 degrees	2018-08-16 12:44:20	162	20.99	20.54	0.44	0	146	0.041	0.448	0.407	0	0.901	0.8	0.6	CHECKSUM ERROR	0	0	0	0	0	0	0
	2018-08-16 12:44:35	162	20.99	20.54	0.44	0	146	0.041	0.449	0.408	0	0.901	0.8	0.6	CHECKSUM ERROR	0	0	0	0	0	0	0
	2018-08-16 12:44:50	163	20.99	20.54	0.45	0	147	0.041	0.452	0.411	0	0.904	0.8	0.6	CHECKSUM ERROR	0	0	0	0	0	0	0
	2018-08-16 12:45:05	165	20.99	20.54	0.45	0	149	0.041	0.457	0.416	0	0.905	0.8	0.6	CHECKSUM ERROR	0	0	0	0	0	0	0
	2018-08-16 12:45:20	165	20.99	20.53	0.45	0	150	0.041	0.46	0.419	0	0.909	0.8	0.6	CHECKSUM ERROR	0	0	0	0	0	0	0
	2018-08-16 12:45:35	166	20.99	20.53	0.46	0	152	0.041	0.465	0.425	0	0.914	0.8	0.6	CHECKSUM ERROR	0	0	0	0	0	0	0
	2018-08-16 12:45:50	167	20.99	20.53	0.46	0	153	0.041	0.467	0.426	0	0.913	0.8	0.6	CHECKSUM ERROR	0	0	0	0	0	0	0
	2018-08-16 12:46:05	168	20.99	20.53	0.46	0	153	0.041	0.468	0.427	0	0.909	0.8	0.6	CHECKSUM ERROR	0	0	0	0	0	0	0
20 meter/min & 20 degrees	2018-08-16 12:46:20	168	20.99	20.52	0.46	0	154	0.041	0.47	0.429	0	0.913	0.8	0.6	CHECKSUM ERROR	0	0	0	0	0	0	0
	2018-08-16 12:46:35	171	20.99	20.52	0.47	0	155	0.041	0.474	0.433	0	0.908	0.8	0.6	CHECKSUM ERROR	0	0	0	0	0	0	0
	2018-08-16 12:46:50	171	20.99	20.52	0.47	0	155	0.041	0.475	0.434	0	0.907	0.8	0.6	CHECKSUM ERROR	0	0	0	0	0	0	0
	2018-08-16 12:47:05	173	20.99	20.51	0.47	0	157	0.041	0.48	0.439	0	0.909	0.9	0.6	CHECKSUM ERROR	0	0	0	0	0	0	0
	2018-08-16 12:47:20	175	20.99	20.51	0.48	0	159	0.041	0.486	0.445	0	0.913	0.9	0.6	CHECKSUM ERROR	0	0	0	0	0	0	0
	2018-08-16 12:47:35	176	20.99	20.5	0.48	0	161	0.041	0.489	0.448	0	0.913	0.9	0.6	CHECKSUM ERROR	0	0	0	0	0	0	0
	2018-08-16 12:47:50	176	20.99	20.5	0.48	0	161	0.041	0.49	0.449	0	0.911	0.9	0.6	CHECKSUM ERROR	0	0	0	0	0	0	0
	2018-08-16 12:48:05	177	20.99	20.5	0.49	0	162	0.041	0.494	0.453	0	0.915	0.9	0.6	CHECKSUM ERROR	0	0	0	0	0	0	0
20 meter/min & 25 degrees	2018-08-16 12:48:20	179	20.99	20.5	0.49	0	164	0.041	0.498	0.457	0	0.915	0.9	0.6	CHECKSUM ERROR	0	0	0	0	0	0	0
	2018-08-16 12:48:35	180	20.99	20.49	0.49	0	165	0.041	0.502	0.461	0	0.915	0.9	0.6	CHECKSUM ERROR	0	0	0	0	0	0	0
	2018-08-16 12:48:50	182	20.99	20.49	0.5	0	168	0.041	0.509	0.468	0	0.923	0.9	0.6	CHECKSUM ERROR	0	0	0	0	0	0	0
	2018-08-16 12:49:05	183	20.99	20.48	0.5	0	169	0.041	0.514	0.473	0	0.925	0.9	0.6	CHECKSUM ERROR	0	0	0	0	0	0	0
	2018-08-16 12:49:20	183	20.99	20.48	0.5	0.1	172	0.041	0.52	0.48	0	0.937	0.9	0.6	CHECKSUM ERROR	0	0	0	0	0	0	0
	2018-08-16 12:49:35	185	20.99	20.48	0.51	0.1	175	0.041	0.528	0.487	0	0.943	0.9	0.6	CHECKSUM ERROR	0	0	0	0	0	0	0
	2018-08-16 12:49:50	186	20.99	20.47	0.51	0.1	176	0.041	0.533	0.492	0	0.947	0.9	0.6	CHECKSUM ERROR	0	0	0	0	0	0	0
	2018-08-16 12:50:05	186	20.99	20.47	0.51	0.1	177	0.041	0.534	0.493	0	0.951	0.9	0.6	CHECKSUM ERROR	0	0	0	0	0	0	0
20 meter/min & 25 degrees	2018-08-16 12:50:20	186	20.99	20.47	0.52	0.1	178	0.041	0.538	0.498	0	0.957	0.9	0.6	CHECKSUM ERROR	0	0	0	0	0	0	0
	2018-08-16 12:50:35	188	20.99	20.46	0.52	0.1	180	0.041	0.543	0.503	0	0.955	0.9	0.6	CHECKSUM ERROR	0	0	0	0	0	0	0
	2018-08-16 12:50:50	192	20.99	20.45	0.53	0.1	184	0.041	0.553	0.513	0	0.956	1	0.6	CHECKSUM ERROR	0	0	0	0	0	0	0
	2018-08-16 12:51:05	196	20.99	20.44	0.54	0.1	188	0.041	0.566	0.525	0	0.961	1	0.6	CHECKSUM ERROR	0	0	0	0	0	0	0
	2018-08-16 12:51:20	197	20.99	20.44	0.55	0.1	192	0.041	0.577	0.536	0	0.976	1	0.6	CHECKSUM ERROR	0	0	0	0	0	0	0
	2018-08-16 12:51:35	199	20.99	20.43	0.55	0.1	195	0.041	0.585	0.544	0.1	0.981	1	0.6	CHECKSUM ERROR	0	0	0	0	0	0	0
	2018-08-16 12:51:50	193	20.99	20.45	0.54	0.1	190	0.041	0.571	0.53	0.1	0.983	1	0.6	CHECKSUM ERROR	0	0	0	0	0	0	0
	2018-08-16 12:52:05	191	20.99	20.45	0.53	0.1	190	0.041	0.571	0.53	0.1	0.992	1	0.6	CHECKSUM ERROR	0	0	0	0	0	0	0

## Sheet: 6-P1187
	Subject ID	6-P1187
	Weight(g)	21.38
	Sex	Male
	Genotype
	Diet	Chow
===============	===============	===============	===============	===============	===============	===============	===============	===============	===============	===============	===============	===============	===============	===============	===============	===============	===============	===============	===============	===============	===============	===============
	DATE/TIME	VO2	O2IN	O2OUT	DO2	ACCO2	VCO2	CO2IN	CO2OUT	DCO2	ACCCO2	RER	HEAT	FLOW	STATUS1	FEED1	FEED1 ACC	DRINK1	DRINK1 ACC	XTOT	XAMB	ZTOT
===============		ml/hr	%	%		l	ml/hr	%	%		l		kcal/hr	LPM		GRAMS	GRAMS	ml	ml	COUNTS	COUNTS	COUNTS
Basal	2018-08-17 08:43:08	68	20.92	20.74	0.18	0	57	0.044	0.203	0.159	0	0.834	0.3	0.6	PFAIL	0	0	0	0	0	0	0
	2018-08-17 08:43:23	67	20.92	20.74	0.18	0	58	0.044	0.206	0.162	0	0.873	0.3	0.6	PFAIL	0	0	0	0	0	0	0
	2018-08-17 08:43:38	79	20.92	20.71	0.21	0	69	0.044	0.235	0.191	0	0.872	0.4	0.6	PFAIL	0	0	0	0	0	0	0
	2018-08-17 08:43:53	82	20.92	20.7	0.22	0	72	0.044	0.244	0.2	0	0.879	0.4	0.6	PFAIL	0	0	0	0	0	0	0
	2018-08-17 08:44:08	80	20.92	20.7	0.22	0	66	0.044	0.229	0.185	0	0.828	0.4	0.6	PFAIL	0	0	0	0	0	0	0
	2018-08-17 08:44:23	65	20.92	20.75	0.17	0	50	0.044	0.183	0.14	0	0.769	0.3	0.6	PFAIL	0	0	0	0	0	0	0
	2018-08-17 08:44:38	52	20.92	20.78	0.14	0	38	0.044	0.15	0.107	0	0.74	0.2	0.6	PFAIL	0	0	0	0	0	0	0
	2018-08-17 08:44:53	49	20.92	20.79	0.13	0	42	0.044	0.16	0.117	0	0.846	0.2	0.6	PFAIL	0	0	0	0	0	0	0
	2018-08-17 08:45:08	68	20.92	20.73	0.19	0	63	0.044	0.219	0.176	0	0.927	0.3	0.6	PFAIL	0	0	0	0	0	0	0
	2018-08-17 08:45:23	86	20.92	20.69	0.23	0	74	0.044	0.251	0.208	0	0.862	0.4	0.6	PFAIL	0	0	0	0	0	0	0
	2018-08-17 08:45:38	90	20.92	20.68	0.24	0	77	0.044	0.259	0.216	0	0.855	0.4	0.6	PFAIL	0	0	0	0	0	0	0
	2018-08-17 08:45:53	98	20.92	20.65	0.27	0	88	0.044	0.288	0.244	0	0.89	0.5	0.6	PFAIL	0	0	0	0	0	0	0
	2018-08-17 08:46:08	104	20.92	20.64	0.28	0	86	0.044	0.284	0.24	0	0.829	0.5	0.6	PFAIL	0	0	0	0	0	0	0
	2018-08-17 08:46:23	93	20.92	20.67	0.25	0	75	0.044	0.254	0.211	0	0.813	0.4	0.6	PFAIL	0	0	0	0	0	0	0
	2018-08-17 08:46:38	89	20.92	20.68	0.24	0	73	0.044	0.247	0.203	0	0.814	0.4	0.6	PFAIL	0	0	0	0	0	0	0
	2018-08-17 08:46:53	98	20.92	20.65	0.27	0	83	0.044	0.275	0.231	0	0.84	0.5	0.6	PFAIL	0	0	0	0	0	0	0
	2018-08-17 08:47:08	109	20.92	20.63	0.29	0	89	0.044	0.293	0.25	0	0.823	0.5	0.6	PFAIL	0	0	0	0	0	0	0
	2018-08-17 08:47:23	110	20.92	20.62	0.3	0	91	0.044	0.297	0.254	0	0.83	0.5	0.6	PFAIL	0	0	0	0	0	0	0
	2018-08-17 08:47:38	107	20.92	20.64	0.28	0	82	0.044	0.274	0.23	0	0.772	0.5	0.6	PFAIL	0	0	0	0	0	0	0
	2018-08-17 08:47:53	78	20.92	20.71	0.21	0	60	0.044	0.21	0.166	0	0.763	0.4	0.6	PFAIL	0	0	0	0	0	0	0
5 meter/min	2018-08-17 08:48:08	83	20.92	20.7	0.22	0	70	0.044	0.238	0.194	0	0.839	0.4	0.6	PFAIL	0	0	0	0	0	0	0
	2018-08-17 08:48:23	87	20.92	20.68	0.23	0	75	0.044	0.253	0.209	0	0.865	0.4	0.6	PFAIL	0	0	0	0	0	0	0
	2018-08-17 08:48:38	113	20.92	20.62	0.3	0	95	0.044	0.31	0.267	0	0.846	0.5	0.6	PFAIL	0	0	0	0	0	0	0
	2018-08-17 08:48:53	125	20.92	20.58	0.34	0	104	0.044	0.334	0.291	0	0.835	0.6	0.6	PFAIL	0	0	0	0	0	0	0
	2018-08-17 08:49:08	133	20.92	20.56	0.36	0	113	0.044	0.36	0.317	0	0.853	0.6	0.6	PFAIL	0	0	0	0	0	0	0
	2018-08-17 08:49:23	135	20.92	20.55	0.37	0	118	0.044	0.372	0.329	0	0.874	0.7	0.6	PFAIL	0	0	0	0	0	0	0
	2018-08-17 08:49:38	141	20.92	20.54	0.38	0	124	0.044	0.389	0.345	0	0.874	0.7	0.6	PFAIL	0	0	0	0	0	0	0
	2018-08-17 08:49:53	144	20.92	20.53	0.39	0	126	0.044	0.396	0.353	0	0.874	0.7	0.6	PFAIL	0	0	0	0	0	0	0
10 meter/min	2018-08-17 08:50:08	146	20.92	20.52	0.4	0	128	0.044	0.402	0.359	0	0.882	0.7	0.6	PFAIL	0	0	0	0	0	0	0
	2018-08-17 08:50:23	144	20.92	20.53	0.39	0	129	0.044	0.403	0.36	0	0.892	0.7	0.6	PFAIL	0	0	0	0	0	0	0
	2018-08-17 08:50:38	153	20.92	20.5	0.42	0	134	0.044	0.418	0.374	0	0.877	0.7	0.6	PFAIL	0	0	0	0	0	0	0
	2018-08-17 08:50:53	156	20.92	20.5	0.42	0	136	0.044	0.422	0.379	0	0.87	0.8	0.6	PFAIL	0	0	0	0	0	0	0
	2018-08-17 08:51:08	156	20.92	20.5	0.42	0	136	0.044	0.423	0.379	0	0.869	0.8	0.6	PFAIL	0	0	0	0	0	0	0
	2018-08-17 08:51:23	155	20.92	20.5	0.42	0	134	0.044	0.418	0.375	0	0.864	0.8	0.6	PFAIL	0	0	0	0	0	0	0
	2018-08-17 08:51:38	154	20.92	20.5	0.42	0	133	0.044	0.414	0.371	0	0.861	0.8	0.6	PFAIL	0	0	0	0	0	0	0
	2018-08-17 08:51:53	155	20.92	20.5	0.42	0	133	0.044	0.415	0.371	0	0.856	0.8	0.6	PFAIL	0	0	0	0	0	0	0
15 meter/min	2018-08-17 08:52:08	153	20.92	20.5	0.42	0	133	0.044	0.414	0.371	0	0.868	0.7	0.6	PFAIL	0	0	0	0	0	0	0
	2018-08-17 08:52:23	157	20.92	20.5	0.42	0	130	0.044	0.407	0.364	0	0.832	0.8	0.6	PFAIL	0	0	0	0	0	0	0
	2018-08-17 08:52:38	154	20.92	20.5	0.42	0	130	0.044	0.408	0.364	0	0.846	0.7	0.6	PFAIL	0	0	0	0	0	0	0
	2018-08-17 08:52:53	154	20.92	20.5	0.42	0	130	0.044	0.408	0.364	0	0.845	0.7	0.6	PFAIL	0	0	0	0	0	0	0
	2018-08-17 08:53:08	154	20.92	20.5	0.42	0	131	0.044	0.408	0.365	0	0.845	0.7	0.6	PFAIL	0	0	0	0	0	0	0
	2018-08-17 08:53:23	156	20.92	20.5	0.42	0	132	0.044	0.412	0.369	0	0.848	0.8	0.6	PFAIL	0	0	0	0	0	0	0
	2018-08-17 08:53:38	156	20.92	20.5	0.42	0	132	0.044	0.412	0.369	0	0.844	0.8	0.6	PFAIL	0	0	0	0	0	0	0
	2018-08-17 08:53:53	157	20.92	20.5	0.42	0	132	0.044	0.413	0.37	0	0.843	0.8	0.6	PFAIL	0	0	0	0	0	0	0
20 meter/min	2018-08-17 08:54:08	156	20.92	20.5	0.42	0	132	0.044	0.411	0.367	0	0.842	0.8	0.6	PFAIL	0	0	0	0	0	0	0
	2018-08-17 08:54:23	154	20.92	20.5	0.42	0	130	0.044	0.408	0.364	0	0.845	0.7	0.6	PFAIL	0	0	0	0	0	0	0
	2018-08-17 08:54:38	153	20.92	20.5	0.41	0	130	0.044	0.407	0.363	0	0.847	0.7	0.6	PFAIL	0	0	0	0	0	0	0
	2018-08-17 08:54:53	155	20.92	20.5	0.42	0	130	0.044	0.407	0.363	0	0.841	0.8	0.6	PFAIL	0	0	0	0	0	0	0
	2018-08-17 08:55:08	154	20.92	20.5	0.42	0	130	0.044	0.406	0.362	0	0.841	0.7	0.6	PFAIL	0	0	0	0	0	0	0
	2018-08-17 08:55:23	154	20.92	20.5	0.42	0	130	0.044	0.406	0.362	0	0.844	0.7	0.6	PFAIL	0	0	0	0	0	0	0
	2018-08-17 08:55:38	153	20.92	20.51	0.41	0	130	0.044	0.407	0.363	0	0.847	0.7	0.6	PFAIL	0	0	0	0	0	0	0
	2018-08-17 08:55:53	154	20.92	20.5	0.42	0	131	0.044	0.409	0.365	0	0.851	0.7	0.6	PFAIL	0	0	0	0	0	0	0
20 meter/min & 5 degrees	2018-08-17 08:56:08	154	20.92	20.5	0.42	0	132	0.044	0.413	0.369	0	0.86	0.7	0.6	PFAIL	0	0	0	0	0	0	0
	2018-08-17 08:56:23	153	20.92	20.5	0.42	0	134	0.044	0.417	0.374	0	0.872	0.8	0.6	PFAIL	0	0	0	0	0	0	0
	2018-08-17 08:56:38	153	20.92	20.5	0.41	0	133	0.044	0.416	0.373	0	0.875	0.7	0.6	PFAIL	0	0	0	0	0	0	0
	2018-08-17 08:56:53	151	20.92	20.51	0.41	0	133	0.044	0.414	0.37	0	0.878	0.7	0.6	PFAIL	0	0	0	0	0	0	0
	2018-08-17 08:57:08	150	20.92	20.51	0.41	0	132	0.044	0.411	0.368	0	0.879	0.7	0.6	PFAIL	0	0	0	0	0	0	0
	2018-08-17 08:57:23	149	20.92	20.51	0.41	0	132	0.044	0.411	0.368	0	0.881	0.7	0.6	PFAIL	0	0	0	0	0	0	0
	2018-08-17 08:57:38	149	20.92	20.51	0.41	0	131	0.044	0.41	0.366	0	0.88	0.7	0.6	PFAIL	0	0	0	0	0	0	0
	2018-08-17 08:57:53	149	20.92	20.51	0.4	0	131	0.044	0.408	0.365	0	0.879	0.7	0.6	PFAIL	0	0	0	0	0	0	0
20 meter/min & 10 degrees	2018-08-17 08:58:08	148	20.92	20.52	0.4	0	131	0.044	0.408	0.365	0	0.881	0.7	0.6	PFAIL	0	0	0	0	0	0	0
	2018-08-17 08:58:23	148	20.92	20.52	0.4	0	131	0.044	0.408	0.365	0	0.88	0.7	0.6	PFAIL	0	0	0	0	0	0	0
	2018-08-17 08:58:38	148	20.92	20.52	0.4	0	131	0.044	0.408	0.365	0	0.883	0.7	0.6	PFAIL	0	0	0	0	0	0	0
	2018-08-17 08:58:53	148	20.92	20.52	0.4	0	130	0.044	0.407	0.364	0	0.883	0.7	0.6	PFAIL	0	0	0	0	0	0	0
	2018-08-17 08:59:08	147	20.92	20.52	0.4	0	130	0.044	0.405	0.362	0	0.879	0.7	0.6	PFAIL	0	0	0	0	0	0	0
	2018-08-17 08:59:23	146	20.92	20.52	0.4	0	129	0.044	0.403	0.36	0	0.88	0.7	0.6	PFAIL	0	0	0	0	0	0	0
	2018-08-17 08:59:38	146	20.92	20.52	0.4	0	128	0.044	0.401	0.357	0	0.875	0.7	0.6	PFAIL	0	0	0	0	0	0	0
	2018-08-17 08:59:53	145	20.92	20.52	0.4	0	128	0.044	0.4	0.357	0	0.879	0.7	0.6	PFAIL	0	0	0	0	0	0	0
20 meter/min & 15 degrees	2018-08-17 09:00:08	146	20.92	20.52	0.4	0	127	0.044	0.4	0.356	0	0.875	0.7	0.6	PFAIL	0	0	0	0	0	0	0
	2018-08-17 09:00:23	144	20.92	20.53	0.39	0	127	0.044	0.398	0.354	0	0.878	0.7	0.6	PFAIL	0	0	0	0	0	0	0
	2018-08-17 09:00:38	146	20.92	20.52	0.4	0	128	0.044	0.401	0.357	0	0.879	0.7	0.6	PFAIL	0	0	0	0	0	0	0
	2018-08-17 09:00:53	148	20.92	20.52	0.4	0	131	0.044	0.41	0.366	0	0.885	0.7	0.6	PFAIL	0	0	0	0	0	0	0
	2018-08-17 09:01:08	149	20.92	20.51	0.41	0	133	0.044	0.415	0.371	0	0.893	0.7	0.6	PFAIL	0	0	0	0	0	0	0
	2018-08-17 09:01:23	149	20.92	20.51	0.41	0	133	0.044	0.416	0.372	0	0.897	0.7	0.6	PFAIL	0	0	0	0	0	0	0
	2018-08-17 09:01:38	149	20.92	20.51	0.41	0	133	0.044	0.415	0.372	0	0.896	0.7	0.6	PFAIL	0	0	0	0	0	0	0
	2018-08-17 09:01:53	147	20.92	20.52	0.4	0	133	0.044	0.414	0.37	0	0.899	0.7	0.6	PFAIL	0	0	0	0	0	0	0
20 meter/min & 20 degrees	2018-08-17 09:02:08	148	20.92	20.51	0.4	0	133	0.044	0.416	0.372	0	0.901	0.7	0.6	PFAIL	0	0	0	0	0	0	0
	2018-08-17 09:02:23	149	20.92	20.51	0.41	0	134	0.044	0.418	0.374	0	0.9	0.7	0.6	PFAIL	0	0	0	0	0	0	0
	2018-08-17 09:02:38	149	20.92	20.51	0.41	0	133	0.044	0.416	0.373	0	0.899	0.7	0.6	PFAIL	0	0	0	0	0	0	0
	2018-08-17 09:02:53	148	20.92	20.51	0.4	0	133	0.044	0.415	0.372	0	0.898	0.7	0.6	PFAIL	0	0	0	0	0	0	0
	2018-08-17 09:03:08	147	20.92	20.52	0.4	0	132	0.044	0.413	0.37	0	0.898	0.7	0.6	PFAIL	0	0	0	0	0	0	0
	2018-08-17 09:03:23	147	20.92	20.52	0.4	0	132	0.044	0.411	0.367	0	0.898	0.7	0.6	PFAIL	0	0	0	0	0	0	0
	2018-08-17 09:03:38	147	20.92	20.52	0.4	0	132	0.044	0.412	0.369	0	0.898	0.7	0.6	PFAIL	0	0	0	0	0	0	0
	2018-08-17 09:03:53	148	20.92	20.52	0.4	0	132	0.044	0.412	0.369	0	0.893	0.7	0.6	PFAIL	0	0	0	0	0	0	0
20 meter/min & 25 degrees	2018-08-17 09:04:08	147	20.92	20.52	0.4	0	132	0.044	0.413	0.37	0	0.898	0.7	0.6	PFAIL	0	0	0	0	0	0	0
	2018-08-17 09:04:23	148	20.92	20.52	0.4	0	133	0.044	0.414	0.37	0	0.898	0.7	0.6	PFAIL	0	0	0	0	0	0	0
	2018-08-17 09:04:38	149	20.92	20.51	0.41	0	134	0.044	0.417	0.374	0	0.899	0.7	0.6	PFAIL	0	0	0	0	0	0	0
	2018-08-17 09:04:53	150	20.92	20.51	0.41	0	135	0.044	0.421	0.377	0	0.903	0.7	0.6	PFAIL	0	0	0	0	0	0	0
	2018-08-17 09:05:08	151	20.92	20.51	0.41	0	137	0.044	0.427	0.384	0	0.911	0.7	0.6	PFAIL	0	0	0	0	0	0	0
	2018-08-17 09:05:23	152	20.92	20.5	0.42	0	139	0.044	0.431	0.388	0	0.912	0.8	0.6	PFAIL	0	0	0	0	0	0	0
	2018-08-17 09:05:38	153	20.92	20.5	0.42	0.1	141	0.044	0.436	0.392	0	0.917	0.8	0.6	PFAIL	0	0	0	0	0	0	0
	2018-08-17 09:05:53	155	20.92	20.49	0.43	0.1	144	0.044	0.445	0.401	0	0.924	0.8	0.6	PFAIL	0	0	0	0	0	0	0
20 meter/min & 25 degrees	2018-08-17 09:06:08	156	20.92	20.49	0.43	0.1	145	0.044	0.449	0.405	0	0.927	0.8	0.6	PFAIL	0	0	0	0	0	0	0
	2018-08-17 09:06:23	157	20.92	20.49	0.43	0.1	147	0.044	0.455	0.412	0	0.937	0.8	0.6	PFAIL	0	0	0	0	0	0	0
	2018-08-17 09:06:38	158	20.92	20.48	0.44	0.1	149	0.044	0.46	0.417	0	0.941	0.8	0.6	PFAIL	0	0	0	0	0	0	0
	2018-08-17 09:06:53	159	20.92	20.48	0.44	0.1	150	0.044	0.462	0.418	0	0.939	0.8	0.6	PFAIL	0	0	0	0	0	0	0
	2018-08-17 09:07:08	159	20.92	20.48	0.44	0.1	150	0.044	0.462	0.418	0	0.939	0.8	0.6	PFAIL	0	0	0	0	0	0	0
	2018-08-17 09:07:23	160	20.92	20.48	0.44	0.1	150	0.044	0.462	0.418	0	0.936	0.8	0.6	PFAIL	0	0	0	0	0	0	0
	2018-08-17 09:07:38	160	20.92	20.48	0.44	0.1	150	0.044	0.463	0.419	0	0.939	0.8	0.6	PFAIL	0	0	0	0	0	0	0
	2018-08-17 09:07:53	160	20.92	20.48	0.44	0.1	150	0.044	0.461	0.418	0	0.933	0.8	0.6	PFAIL	0	0	0	0	0	0	0
20 meter/min & 25 degrees	2018-08-17 09:08:08	161	20.92	20.48	0.44	0.1	151	0.044	0.464	0.421	0.1	0.934	0.8	0.6	PFAIL	0	0	0	0	0	0	0
	2018-08-17 09:08:23	164	20.92	20.47	0.45	0.1	152	0.044	0.467	0.424	0.1	0.926	0.8	0.6	PFAIL	0	0	0	0	0	0	0
	2018-08-17 09:08:38	165	20.92	20.47	0.45	0.1	153	0.044	0.47	0.426	0.1	0.927	0.8	0.6	PFAIL	0	0	0	0	0	0	0
	2018-08-17 09:08:53	164	20.92	20.47	0.45	0.1	153	0.044	0.471	0.428	0.1	0.932	0.8	0.6	PFAIL	0	0	0	0	0	0	0
	2018-08-17 09:09:08	165	20.92	20.47	0.45	0.1	154	0.044	0.473	0.43	0.1	0.931	0.8	0.6	PFAIL	0	0	0	0	0	0	0
	2018-08-17 09:09:23	166	20.92	20.46	0.46	0.1	155	0.044	0.475	0.432	0.1	0.933	0.8	0.6	PFAIL	0	0	0	0	0	0	0
	2018-08-17 09:09:38	165	20.92	20.47	0.45	0.1	154	0.044	0.474	0.43	0.1	0.934	0.8	0.6	PFAIL	0	0	0	0	0	0	0
	2018-08-17 09:09:53	165	20.92	20.47	0.45	0.1	154	0.044	0.473	0.429	0.1	0.933	0.8	0.6	PFAIL	0	0	0	0	0	0	0
20 meter/min & 25 degrees	2018-08-17 09:10:08	164	20.92	20.47	0.45	0.1	153	0.044	0.471	0.427	0.1	0.931	0.8	0.6	PFAIL	0	0	0	0	0	0	0
	2018-08-17 09:10:23	165	20.92	20.47	0.45	0.1	153	0.044	0.47	0.426	0.1	0.926	0.8	0.6	PFAIL	0	0	0	0	0	0	0
	2018-08-17 09:10:38	165	20.92	20.47	0.45	0.1	152	0.044	0.468	0.425	0.1	0.922	0.8	0.6	PFAIL	0	0	0	0	0	0	0
	2018-08-17 09:10:53	165	20.92	20.47	0.45	0.1	152	0.044	0.469	0.425	0.1	0.925	0.8	0.6	PFAIL	0	0	0	0	0	0	0
	2018-08-17 09:11:08	165	20.92	20.47	0.45	0.1	152	0.044	0.468	0.424	0.1	0.922	0.8	0.6	PFAIL	0	0	0	0	0	0	0
	2018-08-17 09:11:23	165	20.92	20.47	0.45	0.1	152	0.044	0.468	0.424	0.1	0.922	0.8	0.6	PFAIL	0	0	0	0	0	0	0
	2018-08-17 09:11:38	167	20.92	20.46	0.46	0.1	154	0.044	0.473	0.429	0.1	0.923	0.8	0.6	PFAIL	0	0	0	0	0	0	0
	2018-08-17 09:11:53	167	20.92	20.46	0.46	0.1	154	0.044	0.474	0.43	0.1	0.924	0.8	0.6	PFAIL	0	0	0	0	0	0	0
20 meter/min & 25 degrees	2018-08-17 09:12:08	167	20.92	20.46	0.46	0.1	155	0.044	0.476	0.433	0.1	0.928	0.8	0.6	PFAIL	0	0	0	0	0	0	0
	2018-08-17 09:12:23	168	20.92	20.46	0.46	0.1	155	0.044	0.476	0.433	0.1	0.924	0.8	0.6	PFAIL	0	0	0	0	0	0	0
	2018-08-17 09:12:38	167	20.92	20.46	0.46	0.1	155	0.044	0.476	0.433	0.1	0.928	0.8	0.6	PFAIL	0	0	0	0	0	0	0
	2018-08-17 09:12:53	168	20.92	20.46	0.46	0.1	155	0.044	0.477	0.433	0.1	0.927	0.8	0.6	PFAIL	0	0	0	0	0	0	0
	2018-08-17 09:13:08	168	20.92	20.46	0.46	0.1	156	0.044	0.478	0.435	0.1	0.926	0.8	0.6	PFAIL	0	0	0	0	0	0	0
	2018-08-17 09:13:23	169	20.92	20.46	0.46	0.1	156	0.044	0.481	0.437	0.1	0.928	0.8	0.6	PFAIL	0	0	0	0	0	0	0
	2018-08-17 09:13:38	169	20.92	20.46	0.46	0.1	156	0.044	0.479	0.436	0.1	0.926	0.8	0.6	PFAIL	0	0	0	0	0	0	0
	2018-08-17 09:13:53	168	20.92	20.46	0.46	0.1	156	0.044	0.479	0.436	0.1	0.927	0.8	0.6	PFAIL	0	0	0	0	0	0	0
20 meter/min & 25 degrees	2018-08-17 09:14:08	169	20.92	20.46	0.46	0.1	156	0.044	0.48	0.436	0.1	0.924	0.8	0.6	PFAIL	0	0	0	0	0	0	0
	2018-08-17 09:14:23	168	20.92	20.46	0.46	0.1	156	0.044	0.478	0.434	0.1	0.924	0.8	0.6	PFAIL	0	0	0	0	0	0	0
	2018-08-17 09:14:38	169	20.92	20.46	0.46	0.1	157	0.044	0.481	0.438	0.1	0.928	0.8	0.6	PFAIL	0	0	0	0	0	0	0
	2018-08-17 09:14:53	169	20.92	20.45	0.46	0.1	157	0.044	0.482	0.438	0.1	0.929	0.8	0.6	PFAIL	0	0	0	0	0	0	0
	2018-08-17 09:15:08	169	20.92	20.45	0.46	0.1	157	0.044	0.482	0.438	0.1	0.929	0.8	0.6	PFAIL	0	0	0	0	0	0	0
	2018-08-17 09:15:23	170	20.92	20.45	0.47	0.1	158	0.044	0.485	0.441	0.1	0.929	0.8	0.6	PFAIL	0	0	0	0	0	0	0
	2018-08-17 09:15:38	170	20.92	20.45	0.47	0.1	157	0.044	0.483	0.439	0.1	0.926	0.8	0.6	PFAIL	0	0	0	0	0	0	0
	2018-08-17 09:15:53	170	20.92	20.45	0.47	0.1	158	0.044	0.485	0.441	0.1	0.93	0.8	0.6	PFAIL	0	0	0	0	0	0	0
20 meter/min & 25 degrees	2018-08-17 09:16:08	171	20.92	20.45	0.47	0.1	159	0.044	0.488	0.444	0.1	0.929	0.8	0.6	PFAIL	0	0	0	0	0	0	0
	2018-08-17 09:16:23	172	20.92	20.45	0.47	0.1	159	0.044	0.488	0.445	0.1	0.929	0.9	0.6	PFAIL	0	0	0	0	0	0	0
	2018-08-17 09:16:38	171	20.92	20.45	0.47	0.1	159	0.044	0.488	0.444	0.1	0.93	0.8	0.6	PFAIL	0	0	0	0	0	0	0
	2018-08-17 09:16:53	171	20.92	20.45	0.47	0.1	160	0.044	0.49	0.446	0.1	0.932	0.9	0.6	PFAIL	0	0	0	0	0	0	0
	2018-08-17 09:17:08	172	20.92	20.45	0.47	0.1	160	0.044	0.491	0.448	0.1	0.931	0.9	0.6	PFAIL	0	0	0	0	0	0	0
	2018-08-17 09:17:23	173	20.92	20.44	0.48	0.1	162	0.044	0.495	0.451	0.1	0.936	0.9	0.6	PFAIL	0	0	0	0	0	0	0
	2018-08-17 09:17:38	174	20.92	20.44	0.48	0.1	162	0.044	0.497	0.454	0.1	0.935	0.9	0.6	PFAIL	0	0	0	0	0	0	0
	2018-08-17 09:17:53	174	20.92	20.44	0.48	0.1	163	0.044	0.499	0.455	0.1	0.937	0.9	0.6	PFAIL	0	0	0	0	0	0	0
20 meter/min & 25 degrees	2018-08-17 09:18:08	173	20.92	20.44	0.48	0.1	164	0.044	0.5	0.457	0.1	0.943	0.9	0.6	PFAIL	0	0	0	0	0	0	0
	2018-08-17 09:18:23	174	20.92	20.44	0.48	0.1	164	0.044	0.501	0.457	0.1	0.944	0.9	0.6	PFAIL	0	0	0	0	0	0	0
	2018-08-17 09:18:38	174	20.92	20.44	0.48	0.1	164	0.044	0.501	0.457	0.1	0.943	0.9	0.6	PFAIL	0	0	0	0	0	0	0
	2018-08-17 09:18:53	174	20.92	20.44	0.48	0.1	164	0.044	0.503	0.459	0.1	0.946	0.9	0.6	PFAIL	0	0	0	0	0	0	0
	2018-08-17 09:19:08	174	20.92	20.44	0.48	0.1	164	0.044	0.502	0.458	0.1	0.946	0.9	0.6	PFAIL	0	0	0	0	0	0	0
	2018-08-17 09:19:23	174	20.92	20.44	0.48	0.1	164	0.044	0.501	0.458	0.1	0.944	0.9	0.6	PFAIL	0	0	0	0	0	0	0
	2018-08-17 09:19:38	173	20.92	20.44	0.48	0.1	164	0.044	0.501	0.457	0.1	0.943	0.9	0.6	PFAIL	0	0	0	0	0	0	0
	2018-08-17 09:19:53	173	20.92	20.44	0.48	0.1	163	0.044	0.499	0.455	0.1	0.943	0.9	0.6	PFAIL	0	0	0	0	0	0	0
20 meter/min & 25 degrees	2018-08-17 09:20:08	172	20.92	20.44	0.48	0.1	163	0.044	0.498	0.455	0.1	0.946	0.9	0.6	PFAIL	0	0	0	0	0	0	0
	2018-08-17 09:20:23	173	20.92	20.44	0.48	0.1	163	0.044	0.498	0.454	0.1	0.94	0.9	0.6	PFAIL	0	0	0	0	0	0	0
	2018-08-17 09:20:38	172	20.92	20.44	0.48	0.1	163	0.044	0.498	0.454	0.1	0.944	0.9	0.6	PFAIL	0	0	0	0	0	0	0
	2018-08-17 09:20:53	173	20.92	20.44	0.48	0.1	163	0.044	0.5	0.456	0.1	0.942	0.9	0.6	PFAIL	0	0	0	0	0	0	0
	2018-08-17 09:21:08	175	20.92	20.44	0.48	0.1	167	0.044	0.511	0.467	0.1	0.954	0.9	0.6	PFAIL	0	0	0	0	0	0	0
	2018-08-17 09:21:23	179	20.92	20.42	0.5	0.1	173	0.044	0.527	0.483	0.1	0.967	0.9	0.6	PFAIL	0	0	0	0	0	0	0

## Sheet: 7-P1188
	Subject ID	7-P1188
	Weight(g)	22.78
	Sex	Male
	Genotype
	Diet	Chow
===============	===============	===============	===============	===============	===============	===============	===============	===============	===============	===============	===============	===============	===============	===============	===============	===============	===============	===============	===============	===============	===============	===============
	DATE/TIME	VO2	O2IN	O2OUT	DO2	ACCO2	VCO2	CO2IN	CO2OUT	DCO2	ACCCO2	RER	HEAT	FLOW	STATUS1	FEED1	FEED1 ACC	DRINK1	DRINK1 ACC	XTOT	XAMB	ZTOT
===============		ml/hr	%	%		l	ml/hr	%	%		l		kcal/hr	LPM		GRAMS	GRAMS	ml	ml	COUNTS	COUNTS	COUNTS
Basal	2018-08-17 10:39:20	57	20.97	20.82	0.15	0	47	0.043	0.174	0.13	0	0.817	0.3	0.6	OVERLOAD	0	0	0	0	0	0	0
	2018-08-17 10:39:35	57	20.97	20.82	0.15	0	46	0.043	0.173	0.13	0	0.821	0.3	0.6	OVERLOAD	0	0	0	0	0	0	0
	2018-08-17 10:39:50	60	20.97	20.81	0.16	0	50	0.043	0.182	0.139	0	0.826	0.3	0.6	OVERLOAD	0	0	0	0	0	0	0
	2018-08-17 10:40:05	61	20.97	20.81	0.16	0	50	0.043	0.182	0.139	0	0.82	0.3	0.6	OVERLOAD	0	0	0	0	0	0	0
	2018-08-17 10:40:20	65	20.97	20.8	0.17	0	55	0.043	0.196	0.153	0	0.845	0.3	0.6	OVERLOAD	0	0	0	0	0	0	0
	2018-08-17 10:40:35	69	20.97	20.78	0.19	0	60	0.043	0.209	0.166	0	0.866	0.3	0.6	OVERLOAD	0	0	0	0	0	0	0
	2018-08-17 10:40:50	69	20.97	20.78	0.19	0	58	0.043	0.206	0.163	0	0.841	0.3	0.6	OVERLOAD	0	0	0	0	0	0	0
	2018-08-17 10:41:05	66	20.97	20.79	0.18	0	55	0.043	0.196	0.153	0	0.828	0.3	0.6	OVERLOAD	0	0	0	0	0	0	0
	2018-08-17 10:41:20	63	20.97	20.8	0.17	0	52	0.043	0.189	0.146	0	0.825	0.3	0.6	OVERLOAD	0	0	0	0	0	0	0
	2018-08-17 10:41:35	65	20.97	20.8	0.17	0	54	0.043	0.194	0.151	0	0.837	0.3	0.6	OVERLOAD	0	0	0	0	0	0	0
	2018-08-17 10:41:50	64	20.97	20.8	0.17	0	51	0.043	0.187	0.144	0	0.802	0.3	0.6	OVERLOAD	0	0	0	0	0	0	0
	2018-08-17 10:42:05	64	20.97	20.8	0.17	0	53	0.043	0.191	0.148	0	0.83	0.3	0.6	OVERLOAD	0	0	0	0	0	0	0
	2018-08-17 10:42:20	69	20.97	20.78	0.19	0	58	0.043	0.204	0.161	0	0.837	0.3	0.6	OVERLOAD	0	0	0	0	0	0	0
	2018-08-17 10:42:35	72	20.97	20.78	0.19	0	59	0.043	0.207	0.164	0	0.817	0.3	0.6	OVERLOAD	0	0	0	0	0	0	0
	2018-08-17 10:42:50	69	20.97	20.79	0.19	0	56	0.043	0.199	0.156	0	0.807	0.3	0.6	OVERLOAD	0	0	0	0	0	0	0
	2018-08-17 10:43:05	68	20.97	20.79	0.18	0	54	0.043	0.193	0.15	0	0.796	0.3	0.6	OVERLOAD	0	0	0	0	0	0	0
	2018-08-17 10:43:20	63	20.97	20.8	0.17	0	50	0.043	0.183	0.139	0	0.792	0.3	0.6	OVERLOAD	0	0	0	0	0	0	0
	2018-08-17 10:43:35	60	20.97	20.81	0.16	0	48	0.043	0.177	0.134	0	0.806	0.3	0.6	OVERLOAD	0	0	0	0	0	0	0
	2018-08-17 10:43:50	64	20.97	20.8	0.17	0	53	0.043	0.192	0.149	0	0.827	0.3	0.6	OVERLOAD	0	0	0.02	0.02	0	0	0
	2018-08-17 10:44:05	70	20.97	20.78	0.19	0	58	0.043	0.205	0.162	0	0.826	0.3	0.6	OVERLOAD	0	0	0	0.02	0	0	0
5 meter/min	2018-08-17 10:44:20	85	20.97	20.74	0.23	0	73	0.043	0.247	0.204	0	0.862	0.4	0.6	OVERLOAD	0	0	0	0.02	0	0	0
	2018-08-17 10:44:35	98	20.97	20.71	0.27	0	84	0.043	0.277	0.234	0	0.854	0.5	0.6	OVERLOAD	0	0	0	0.02	0	0	0
	2018-08-17 10:44:50	115	20.97	20.66	0.31	0	95	0.043	0.309	0.266	0	0.826	0.6	0.6	OVERLOAD	0	0	0	0.02	0	0	0
	2018-08-17 10:45:05	124	20.97	20.64	0.33	0	100	0.043	0.322	0.279	0	0.805	0.6	0.6	OVERLOAD	0	0	0	0.02	0	0	0
	2018-08-17 10:45:20	125	20.97	20.64	0.34	0	102	0.043	0.328	0.284	0	0.815	0.6	0.6	OVERLOAD	0	0	0	0.02	0	0	0
	2018-08-17 10:45:35	128	20.97	20.63	0.35	0	106	0.043	0.338	0.295	0	0.823	0.6	0.6	OVERLOAD	0	0	0	0.02	0	0	0
	2018-08-17 10:45:50	127	20.97	20.63	0.34	0	104	0.043	0.333	0.29	0	0.816	0.6	0.6	OVERLOAD	0	0	0	0.02	0	0	0
	2018-08-17 10:46:05	131	20.97	20.62	0.35	0	107	0.043	0.341	0.298	0	0.815	0.6	0.6	OVERLOAD	0	0	0	0.02	0	0	0
10 meter/min	2018-08-17 10:46:20	131	20.97	20.62	0.35	0	106	0.043	0.341	0.297	0	0.811	0.6	0.6	OVERLOAD	0	0	0	0.02	0	0	0
	2018-08-17 10:46:35	136	20.97	20.61	0.37	0	110	0.043	0.352	0.308	0	0.81	0.7	0.6	OVERLOAD	0	0	0	0.02	0	0	0
	2018-08-17 10:46:50	140	20.97	20.59	0.38	0	113	0.043	0.359	0.316	0	0.807	0.7	0.6	OVERLOAD	0	0	0	0.02	0	0	0
	2018-08-17 10:47:05	142	20.97	20.59	0.38	0	114	0.043	0.361	0.318	0	0.802	0.7	0.6	OVERLOAD	0	0	0	0.02	0	0	0
	2018-08-17 10:47:20	142	20.97	20.59	0.38	0	115	0.043	0.363	0.32	0	0.809	0.7	0.6	OVERLOAD	0	0	0	0.02	0	0	0
	2018-08-17 10:47:35	144	20.97	20.58	0.39	0	116	0.043	0.368	0.325	0	0.808	0.7	0.6	OVERLOAD	0	0	0	0.02	0	0	0
	2018-08-17 10:47:50	145	20.97	20.58	0.39	0	117	0.043	0.37	0.327	0	0.809	0.7	0.6	OVERLOAD	0	0	0	0.02	0	0	0
	2018-08-17 10:48:05	145	20.97	20.58	0.39	0	118	0.043	0.372	0.329	0	0.81	0.7	0.6	OVERLOAD	0	0	0	0.02	0	0	0
15 meter/min	2018-08-17 10:48:20	145	20.97	20.58	0.39	0	117	0.043	0.37	0.327	0	0.807	0.7	0.6	OVERLOAD	0	0	0	0.02	0	0	0
	2018-08-17 10:48:35	145	20.97	20.58	0.39	0	117	0.043	0.369	0.326	0	0.806	0.7	0.6	OVERLOAD	0	0	0	0.02	0	0	0
	2018-08-17 10:48:50	146	20.97	20.58	0.39	0	117	0.043	0.371	0.328	0	0.805	0.7	0.6	OVERLOAD	0	0	0	0.02	0	0	0
	2018-08-17 10:49:05	146	20.97	20.58	0.39	0	117	0.043	0.371	0.328	0	0.802	0.7	0.6	OVERLOAD	0	0	0	0.02	0	0	0
	2018-08-17 10:49:20	147	20.97	20.58	0.39	0	118	0.043	0.373	0.33	0	0.806	0.7	0.6	OVERLOAD	0	0	0	0.02	0	0	0
	2018-08-17 10:49:35	147	20.97	20.58	0.39	0	118	0.043	0.374	0.331	0	0.806	0.7	0.6	OVERLOAD	0	0	0	0.02	0	0	0
	2018-08-17 10:49:50	147	20.97	20.58	0.39	0	119	0.043	0.375	0.331	0	0.808	0.7	0.6	OVERLOAD	0	0	0	0.02	0	0	0
	2018-08-17 10:50:05	146	20.97	20.58	0.39	0	118	0.043	0.374	0.331	0	0.812	0.7	0.6	OVERLOAD	0	0	0	0.02	0	0	0
20 meter/min	2018-08-17 10:50:20	146	20.97	20.58	0.39	0	118	0.043	0.374	0.33	0	0.809	0.7	0.6	OVERLOAD	0	0	0	0.02	0	0	0
	2018-08-17 10:50:35	146	20.97	20.58	0.39	0	118	0.043	0.373	0.33	0	0.806	0.7	0.6	OVERLOAD	0	0	0	0.02	0	0	0
	2018-08-17 10:50:50	146	20.97	20.58	0.39	0	119	0.043	0.375	0.332	0	0.811	0.7	0.6	OVERLOAD	0	0	0	0.02	0	0	0
	2018-08-17 10:51:05	146	20.97	20.58	0.39	0	119	0.043	0.376	0.333	0	0.815	0.7	0.6	OVERLOAD	0	0	0	0.02	0	0	0
	2018-08-17 10:51:20	147	20.97	20.58	0.4	0	121	0.043	0.381	0.338	0	0.822	0.7	0.6	OVERLOAD	0	0	0	0.02	0	0	0
	2018-08-17 10:51:35	147	20.97	20.57	0.4	0	122	0.043	0.384	0.341	0	0.827	0.7	0.6	OVERLOAD	0	0	0	0.02	0	0	0
	2018-08-17 10:51:50	148	20.97	20.57	0.4	0	122	0.043	0.385	0.342	0	0.83	0.7	0.6	OVERLOAD	0	0	0	0.02	0	0	0
	2018-08-17 10:52:05	147	20.97	20.57	0.4	0	123	0.043	0.386	0.343	0	0.836	0.7	0.6	OVERLOAD	0	0	0	0.02	0	0	0
20 meter/min & 5 degrees	2018-08-17 10:52:20	147	20.97	20.57	0.4	0	123	0.043	0.388	0.345	0	0.838	0.7	0.6	OVERLOAD	0	0	0	0.02	0	0	0
	2018-08-17 10:52:35	147	20.97	20.58	0.4	0	123	0.043	0.387	0.343	0	0.839	0.7	0.6	OVERLOAD	0	0	0	0.02	0	0	0
	2018-08-17 10:52:50	146	20.97	20.58	0.39	0	123	0.043	0.387	0.344	0	0.843	0.7	0.6	OVERLOAD	0	0	0	0.02	0	0	0
	2018-08-17 10:53:05	147	20.97	20.57	0.4	0	125	0.043	0.391	0.348	0	0.845	0.7	0.6	OVERLOAD	0	0	0	0.02	0	0	0
	2018-08-17 10:53:20	148	20.97	20.57	0.4	0	126	0.043	0.395	0.352	0	0.849	0.7	0.6	OVERLOAD	0	0	0	0.02	0	0	0
	2018-08-17 10:53:35	148	20.97	20.57	0.4	0	127	0.043	0.397	0.353	0	0.856	0.7	0.6	OVERLOAD	0	0	0	0.02	0	0	0
	2018-08-17 10:53:50	148	20.97	20.57	0.4	0	128	0.043	0.4	0.357	0	0.864	0.7	0.6	OVERLOAD	0	0	0	0.02	0	0	0
	2018-08-17 10:54:05	150	20.97	20.57	0.41	0	129	0.043	0.403	0.36	0	0.861	0.7	0.6	OVERLOAD	0	0	0	0.02	0	0	0
20 meter/min & 10 degrees	2018-08-17 10:54:20	149	20.97	20.57	0.41	0	129	0.043	0.402	0.359	0	0.86	0.7	0.6	OVERLOAD	0	0	0	0.02	0	0	0
	2018-08-17 10:54:35	149	20.97	20.57	0.4	0	129	0.043	0.404	0.361	0	0.868	0.7	0.6	OVERLOAD	0	0	0	0.02	0	0	0
	2018-08-17 10:54:50	151	20.97	20.56	0.41	0	131	0.043	0.41	0.366	0	0.869	0.7	0.6	OVERLOAD	0	0	0	0.02	0	0	0
	2018-08-17 10:55:05	151	20.97	20.56	0.41	0	131	0.043	0.409	0.366	0	0.869	0.7	0.6	OVERLOAD	0	0	0	0.02	0	0	0
	2018-08-17 10:55:20	150	20.97	20.56	0.41	0	132	0.043	0.411	0.368	0	0.876	0.7	0.6	OVERLOAD	0	0	0	0.02	0	0	0
	2018-08-17 10:55:35	151	20.97	20.56	0.41	0	132	0.043	0.413	0.37	0	0.875	0.7	0.6	OVERLOAD	0	0	0	0.02	0	0	0
	2018-08-17 10:55:50	152	20.97	20.56	0.41	0	133	0.043	0.416	0.372	0	0.879	0.7	0.6	OVERLOAD	0	0	0	0.02	0	0	0
	2018-08-17 10:56:05	153	20.97	20.56	0.42	0	134	0.043	0.419	0.375	0	0.881	0.7	0.6	OVERLOAD	0	0	0	0.02	0	0	0
20 meter/min & 15 degrees	2018-08-17 10:56:20	153	20.97	20.55	0.42	0	135	0.043	0.419	0.376	0	0.879	0.8	0.6	OVERLOAD	0	0	0	0.02	0	0	0
	2018-08-17 10:56:35	153	20.97	20.56	0.42	0	134	0.043	0.419	0.375	0	0.88	0.7	0.6	OVERLOAD	0	0	0	0.02	0	0	0
	2018-08-17 10:56:50	153	20.97	20.55	0.42	0	136	0.043	0.422	0.379	0	0.885	0.8	0.6	OVERLOAD	0	0	0	0.02	0	0	0
	2018-08-17 10:57:05	155	20.97	20.55	0.42	0	138	0.043	0.428	0.385	0	0.887	0.8	0.6	OVERLOAD	0	0	0	0.02	0	0	0
	2018-08-17 10:57:20	158	20.97	20.54	0.43	0	140	0.043	0.435	0.392	0	0.891	0.8	0.6	OVERLOAD	0	0	0	0.02	0	0	0
	2018-08-17 10:57:35	158	20.97	20.54	0.43	0	141	0.043	0.437	0.394	0	0.893	0.8	0.6	OVERLOAD	0	0	0	0.02	0	0	0
	2018-08-17 10:57:50	158	20.97	20.54	0.43	0	142	0.043	0.439	0.396	0	0.896	0.8	0.6	OVERLOAD	0	0	0	0.02	0	0	0
	2018-08-17 10:58:05	160	20.97	20.53	0.44	0	144	0.043	0.445	0.402	0	0.901	0.8	0.6	OVERLOAD	0	0	0	0.02	0	0	0
20 meter/min & 20 degrees	2018-08-17 10:58:20	161	20.97	20.53	0.44	0	147	0.043	0.453	0.41	0	0.912	0.8	0.6	OVERLOAD	0	0	0	0.02	0	0	0
	2018-08-17 10:58:35	161	20.97	20.53	0.44	0	149	0.043	0.458	0.415	0	0.922	0.8	0.6	OVERLOAD	0	0	0	0.02	0	0	0
	2018-08-17 10:58:50	165	20.97	20.52	0.45	0	150	0.043	0.463	0.42	0	0.909	0.8	0.6	OVERLOAD	0	0	0	0.02	0	0	0
	2018-08-17 10:59:05	165	20.97	20.52	0.45	0	151	0.043	0.464	0.421	0	0.915	0.8	0.6	OVERLOAD	0	0	0	0.02	0	0	0
	2018-08-17 10:59:20	166	20.97	20.52	0.46	0	152	0.043	0.469	0.426	0	0.919	0.8	0.6	OVERLOAD	0	0	0	0.02	0	0	0
	2018-08-17 10:59:35	168	20.97	20.51	0.46	0	157	0.043	0.481	0.438	0	0.932	0.8	0.6	OVERLOAD	0	0	0	0.02	0	0	0
	2018-08-17 10:59:50	170	20.97	20.5	0.47	0	161	0.043	0.494	0.45	0	0.948	0.8	0.6	OVERLOAD	0	0	0	0.02	0	0	0
	2018-08-17 11:00:05	172	20.97	20.49	0.48	0	165	0.043	0.504	0.461	0	0.959	0.9	0.6	OVERLOAD	0	0	0	0.02	0	0	0
20 meter/min & 25 degrees	2018-08-17 11:00:20	174	20.97	20.49	0.48	0	167	0.043	0.511	0.467	0	0.959	0.9	0.6	OVERLOAD	0	0	0	0.02	0	0	0
	2018-08-17 11:00:35	177	20.97	20.48	0.49	0	170	0.043	0.519	0.475	0	0.964	0.9	0.6	OVERLOAD	0	0	0	0.02	0	0	0
	2018-08-17 11:00:50	180	20.97	20.47	0.5	0	175	0.043	0.533	0.489	0	0.974	0.9	0.6	OVERLOAD	0	0	0	0.02	0	0	0
	2018-08-17 11:01:05	186	20.97	20.45	0.52	0	183	0.043	0.553	0.51	0	0.984	0.9	0.6	OVERLOAD	0	0	0	0.02	0	0	0
	2018-08-17 11:01:20	188	20.97	20.45	0.52	0	186	0.043	0.563	0.52	0	0.992	0.9	0.6	OVERLOAD	0	0	0	0.02	0	0	0
	2018-08-17 11:01:35	186	20.97	20.45	0.52	0	183	0.043	0.555	0.512	0	0.988	0.9	0.6	OVERLOAD	0	0	0	0.02	0	0	0

## Sheet: 1- S1190
	Subject ID	1- S1190
	Weight(g)	30.31
	Sex	Male
	Genotype
	Diet	Chow
===============	===============	===============	===============	===============	===============	===============	===============	===============	===============	===============	===============	===============	===============	===============	===============	===============	===============	===============	===============	===============	===============	===============
	DATE/TIME	VO2	O2IN	O2OUT	DO2	ACCO2	VCO2	CO2IN	CO2OUT	DCO2	ACCCO2	RER	HEAT	FLOW	STATUS1	FEED1	FEED1 ACC	DRINK1	DRINK1 ACC	XTOT	XAMB	ZTOT
===============		ml/hr	%	%		l	ml/hr	%	%		l		kcal/hr	LPM		GRAMS	GRAMS	ml	ml	COUNTS	COUNTS	COUNTS
Basal	2018-08-15 08:21:22	67	20.89	20.7	0.18	0	58	0.042	0.203	0.161	0	0.857	0.3	0.6	OVERLOAD	0	0	0	0	0	0	0
	2018-08-15 08:21:37	60	20.89	20.72	0.17	0	54	0.042	0.193	0.151	0	0.895	0.3	0.6	OVERLOAD	0	0	0	0	0	0	0
	2018-08-15 08:21:52	69	20.89	20.7	0.19	0	59	0.042	0.208	0.166	0	0.858	0.3	0.6	OVERLOAD	0	0	0	0	0	0	0
	2018-08-15 08:22:07	74	20.89	20.68	0.2	0	66	0.042	0.227	0.185	0	0.899	0.4	0.6	OVERLOAD	0	0	0	0	0	0	0
	2018-08-15 08:22:22	84	20.89	20.66	0.23	0	72	0.042	0.243	0.201	0	0.856	0.4	0.6	OVERLOAD	0	0	0	0	0	0	0
	2018-08-15 08:22:37	79	20.89	20.67	0.21	0	64	0.042	0.221	0.179	0	0.81	0.4	0.6	OVERLOAD	0	0	0	0	0	0	0
	2018-08-15 08:22:52	79	20.89	20.67	0.21	0	66	0.042	0.227	0.185	0	0.835	0.4	0.6	OVERLOAD	0	0	0	0	0	0	0
	2018-08-15 08:23:07	80	20.89	20.67	0.22	0	67	0.042	0.23	0.188	0	0.842	0.4	0.6	OVERLOAD	0	0	0	0	0	0	0
	2018-08-15 08:23:22	86	20.89	20.65	0.23	0	70	0.042	0.237	0.195	0	0.81	0.4	0.6	OVERLOAD	0	0	0	0	0	0	0
	2018-08-15 08:23:37	83	20.89	20.66	0.22	0	66	0.042	0.227	0.185	0	0.799	0.4	0.6	OVERLOAD	0	0	0	0	0	0	0
	2018-08-15 08:23:52	71	20.89	20.7	0.19	0	52	0.042	0.186	0.144	0	0.728	0.3	0.6	OVERLOAD	0	0	0	0	0	0	0
	2018-08-15 08:24:07	61	20.89	20.72	0.16	0	47	0.042	0.174	0.132	0	0.77	0.3	0.6	OVERLOAD	0	0	0	0	0	0	0
	2018-08-15 08:24:22	68	20.89	20.7	0.18	0	52	0.042	0.188	0.146	0	0.774	0.3	0.6	OVERLOAD	0	0	0	0	0	0	0
	2018-08-15 08:24:37	79	20.89	20.67	0.21	0	65	0.042	0.223	0.181	0	0.815	0.4	0.6	OVERLOAD	0	0	0	0	0	0	0
	2018-08-15 08:24:52	82	20.89	20.67	0.22	0	62	0.042	0.214	0.172	0	0.746	0.4	0.6	OVERLOAD	0	0	0	0	0	0	0
	2018-08-15 08:25:07	78	20.89	20.68	0.21	0	60	0.042	0.211	0.169	0	0.772	0.4	0.6	OVERLOAD	0	0	0	0	0	0	0
	2018-08-15 08:25:22	78	20.89	20.68	0.21	0	57	0.042	0.201	0.159	0	0.731	0.4	0.6	OVERLOAD	0	0	0	0	0	0	0
	2018-08-15 08:25:37	72	20.89	20.7	0.19	0	51	0.042	0.184	0.142	0	0.707	0.3	0.6	OVERLOAD	0	0	0	0	0	0	0
	2018-08-15 08:25:52	65	20.89	20.71	0.17	0	47	0.042	0.173	0.131	0	0.718	0.3	0.6	OVERLOAD	0	0	0	0	0	0	0
	2018-08-15 08:26:07	63	20.89	20.72	0.16	0	41	0.042	0.157	0.115	0	0.654	0.3	0.6	OVERLOAD	0	0	0	0	0	0	0
5 meter/min	2018-08-15 08:26:22	60	20.89	20.72	0.16	0	48	0.042	0.177	0.135	0	0.801	0.3	0.6	OVERLOAD	0	0	0	0	0	0	0
	2018-08-15 08:26:37	80	20.89	20.66	0.22	0	75	0.042	0.25	0.208	0	0.931	0.4	0.6	OVERLOAD	0	0	0	0	0	0	0
	2018-08-15 08:26:52	122	20.89	20.56	0.33	0	101	0.042	0.325	0.283	0	0.832	0.6	0.6	OVERLOAD	0	0	0	0	0	0	0
	2018-08-15 08:27:07	137	20.89	20.52	0.37	0	114	0.042	0.36	0.318	0	0.832	0.7	0.6	OVERLOAD	0	0	0	0	0	0	0
	2018-08-15 08:27:22	141	20.89	20.5	0.38	0	119	0.042	0.373	0.331	0	0.842	0.7	0.6	OVERLOAD	0	0	0	0	0	0	0
	2018-08-15 08:27:37	142	20.89	20.5	0.39	0	123	0.042	0.387	0.345	0	0.867	0.7	0.6	OVERLOAD	0	0	0	0	0	0	0
	2018-08-15 08:27:52	145	20.89	20.49	0.39	0	125	0.042	0.39	0.348	0	0.863	0.7	0.6	OVERLOAD	0	0	0	0	0	0	0
	2018-08-15 08:28:07	143	20.89	20.5	0.39	0	124	0.042	0.388	0.346	0	0.866	0.7	0.6	OVERLOAD	0	0	0	0	0	0	0
10 meter/min	2018-08-15 08:28:22	149	20.89	20.48	0.4	0	128	0.042	0.401	0.359	0	0.863	0.7	0.6	OVERLOAD	0	0	0	0	0	0	0
	2018-08-15 08:28:37	154	20.89	20.47	0.42	0	132	0.042	0.411	0.369	0	0.857	0.8	0.6	OVERLOAD	0	0	0	0	0	0	0
	2018-08-15 08:28:52	161	20.89	20.45	0.43	0	136	0.042	0.422	0.38	0	0.845	0.8	0.6	OVERLOAD	0	0	0	0	0	0	0
	2018-08-15 08:29:07	166	20.89	20.44	0.45	0	138	0.042	0.427	0.386	0	0.83	0.8	0.6	OVERLOAD	0	0	0	0	0	0	0
	2018-08-15 08:29:22	166	20.89	20.44	0.45	0	138	0.042	0.426	0.385	0	0.83	0.8	0.6	OVERLOAD	0	0	0	0	0	0	0
	2018-08-15 08:29:37	169	20.89	20.43	0.46	0	140	0.042	0.433	0.391	0	0.826	0.8	0.6	OVERLOAD	0	0	0	0	0	0	0
	2018-08-15 08:29:52	170	20.89	20.43	0.46	0	140	0.042	0.434	0.392	0	0.824	0.8	0.6	OVERLOAD	0	0	0	0	0	0	0
	2018-08-15 08:30:07	171	20.89	20.43	0.46	0	139	0.042	0.431	0.389	0	0.813	0.8	0.6	OVERLOAD	0	0	0	0	0	0	0
15 meter/min	2018-08-15 08:30:22	173	20.89	20.42	0.46	0	141	0.042	0.435	0.393	0	0.815	0.8	0.6	OVERLOAD	0	0	0	0	0	0	0
	2018-08-15 08:30:37	174	20.89	20.42	0.47	0	141	0.042	0.436	0.394	0	0.808	0.8	0.6	OVERLOAD	0	0	0	0	0	0	0
	2018-08-15 08:30:52	176	20.89	20.41	0.47	0	141	0.042	0.437	0.395	0	0.803	0.8	0.6	OVERLOAD	0	0	0	0	0	0	0
	2018-08-15 08:31:07	175	20.89	20.42	0.47	0	141	0.042	0.435	0.393	0	0.803	0.8	0.6	OVERLOAD	0	0	0	0	0	0	0
	2018-08-15 08:31:22	178	20.89	20.41	0.48	0	143	0.042	0.441	0.399	0	0.805	0.9	0.6	OVERLOAD	0	0	0	0	0	0	0
	2018-08-15 08:31:37	178	20.89	20.41	0.48	0	144	0.042	0.444	0.402	0	0.809	0.9	0.6	OVERLOAD	0	0	0	0	0	0	0
	2018-08-15 08:31:52	178	20.89	20.41	0.48	0	144	0.042	0.445	0.403	0	0.812	0.9	0.6	OVERLOAD	0	0	0	0	0	0	0
	2018-08-15 08:32:07	179	20.89	20.4	0.48	0	146	0.042	0.451	0.409	0	0.819	0.9	0.6	OVERLOAD	0	0	0	0	0	0	0
20 meter/min	2018-08-15 08:32:22	183	20.89	20.39	0.49	0	154	0.042	0.473	0.431	0	0.842	0.9	0.6	OVERLOAD	0	0	0	0	0	0	0
	2018-08-15 08:32:37	187	20.89	20.38	0.51	0	159	0.042	0.486	0.444	0	0.852	0.9	0.6	OVERLOAD	0	0	0	0	0	0	0
	2018-08-15 08:32:52	186	20.89	20.38	0.5	0	160	0.042	0.488	0.447	0	0.858	0.9	0.6	OVERLOAD	0	0	0	0	0	0	0
	2018-08-15 08:33:07	186	20.89	20.38	0.51	0	161	0.042	0.491	0.449	0	0.863	0.9	0.6	OVERLOAD	0	0	0	0	0	0	0
	2018-08-15 08:33:22	187	20.89	20.38	0.51	0	161	0.042	0.492	0.45	0	0.862	0.9	0.6	OVERLOAD	0	0	0	0	0	0	0
	2018-08-15 08:33:37	187	20.89	20.38	0.51	0	161	0.042	0.491	0.449	0	0.86	0.9	0.6	OVERLOAD	0	0	0	0	0	0	0
	2018-08-15 08:33:52	186	20.89	20.38	0.5	0	159	0.042	0.487	0.445	0	0.854	0.9	0.6	OVERLOAD	0	0	0	0	0	0	0
	2018-08-15 08:34:07	186	20.89	20.38	0.5	0	158	0.042	0.483	0.441	0	0.85	0.9	0.6	OVERLOAD	0	0	0	0	0	0	0
20 meter/min & 5 degrees	2018-08-15 08:34:22	185	20.89	20.39	0.5	0	156	0.042	0.479	0.437	0	0.845	0.9	0.6	OVERLOAD	0	0	0	0	0	0	0
	2018-08-15 08:34:37	184	20.89	20.39	0.5	0	154	0.042	0.473	0.431	0	0.839	0.9	0.6	OVERLOAD	0	0	0	0	0	0	0
	2018-08-15 08:34:52	184	20.89	20.39	0.5	0	155	0.042	0.475	0.434	0	0.843	0.9	0.6	OVERLOAD	0	0	0	0	0	0	0
	2018-08-15 08:35:07	187	20.89	20.38	0.5	0	157	0.042	0.481	0.439	0	0.842	0.9	0.6	OVERLOAD	0	0	0	0	0	0	0
	2018-08-15 08:35:22	188	20.89	20.38	0.51	0	158	0.042	0.484	0.442	0	0.84	0.9	0.6	OVERLOAD	0	0	0	0	0	0	0
	2018-08-15 08:35:37	188	20.89	20.38	0.51	0	157	0.042	0.48	0.438	0	0.836	0.9	0.6	OVERLOAD	0	0	0	0	0	0	0
	2018-08-15 08:35:52	188	20.89	20.38	0.51	0	157	0.042	0.48	0.438	0	0.835	0.9	0.6	OVERLOAD	0	0	0	0	0	0	0
	2018-08-15 08:36:07	188	20.89	20.38	0.51	0	156	0.042	0.477	0.435	0	0.829	0.9	0.6	OVERLOAD	0	0	0	0	0	0	0
20 meter/min & 10 degrees	2018-08-15 08:36:22	187	20.89	20.38	0.5	0	155	0.042	0.475	0.433	0	0.828	0.9	0.6	OVERLOAD	0	0	0	0	0	0	0
	2018-08-15 08:36:37	188	20.89	20.38	0.51	0	155	0.042	0.474	0.432	0	0.823	0.9	0.6	OVERLOAD	0	0	0	0	0	0	0
	2018-08-15 08:36:52	188	20.89	20.38	0.51	0	155	0.042	0.475	0.433	0	0.822	0.9	0.6	OVERLOAD	0	0	0	0	0	0	0
	2018-08-15 08:37:07	189	20.89	20.38	0.51	0	155	0.042	0.476	0.434	0	0.821	0.9	0.6	OVERLOAD	0	0	0	0	0	0	0
	2018-08-15 08:37:22	190	20.89	20.37	0.51	0	155	0.042	0.474	0.432	0	0.813	0.9	0.6	OVERLOAD	0	0	0	0	0	0	0
	2018-08-15 08:37:37	189	20.89	20.38	0.51	0	155	0.042	0.475	0.433	0	0.82	0.9	0.6	OVERLOAD	0	0	0	0	0	0	0
	2018-08-15 08:37:52	192	20.89	20.37	0.52	0	157	0.042	0.481	0.439	0	0.817	0.9	0.6	OVERLOAD	0	0	0	0	0	0	0
	2018-08-15 08:38:07	192	20.89	20.37	0.52	0	157	0.042	0.481	0.439	0	0.817	0.9	0.6	OVERLOAD	0	0	0	0	0	0	0
20 meter/min & 15 degrees	2018-08-15 08:38:22	193	20.89	20.37	0.52	0	157	0.042	0.481	0.44	0	0.814	0.9	0.6	OVERLOAD	0	0	0	0	0	0	0
	2018-08-15 08:38:37	193	20.89	20.37	0.52	0	157	0.042	0.481	0.439	0	0.813	0.9	0.6	OVERLOAD	0	0	0	0	0	0	0
	2018-08-15 08:38:52	194	20.89	20.36	0.52	0	158	0.042	0.484	0.442	0	0.816	0.9	0.6	OVERLOAD	0	0	0	0	0	0	0
	2018-08-15 08:39:07	197	20.89	20.36	0.53	0	161	0.042	0.491	0.449	0	0.817	0.9	0.6	OVERLOAD	0	0	0	0	0	0	0
	2018-08-15 08:39:22	198	20.89	20.35	0.53	0	163	0.042	0.496	0.454	0	0.822	1	0.6	OVERLOAD	0	0	0	0	0	0	0
	2018-08-15 08:39:37	202	20.89	20.34	0.54	0	167	0.042	0.51	0.468	0	0.831	1	0.6	OVERLOAD	0	0	0	0	0	0	0
	2018-08-15 08:39:52	203	20.89	20.34	0.55	0	169	0.042	0.514	0.472	0	0.834	1	0.6	OVERLOAD	0	0	0	0	0	0	0
	2018-08-15 08:40:07	204	20.89	20.33	0.55	0	170	0.042	0.518	0.476	0	0.835	1	0.6	OVERLOAD	0	0	0	0	0	0	0
20 meter/min & 20 degrees	2018-08-15 08:40:22	203	20.89	20.34	0.55	0	170	0.042	0.516	0.474	0	0.833	1	0.6	OVERLOAD	0	0	0	0	0	0	0
	2018-08-15 08:40:37	203	20.89	20.34	0.55	0	169	0.042	0.514	0.472	0	0.832	1	0.6	OVERLOAD	0	0	0	0	0	0	0
	2018-08-15 08:40:52	204	20.89	20.34	0.55	0	170	0.042	0.517	0.475	0	0.835	1	0.6	OVERLOAD	0	0	0	0	0	0	0
	2018-08-15 08:41:07	207	20.89	20.33	0.56	0.1	174	0.042	0.528	0.486	0	0.841	1	0.6	OVERLOAD	0	0	0	0	0	0	0
	2018-08-15 08:41:22	208	20.89	20.32	0.56	0.1	175	0.042	0.53	0.488	0	0.841	1	0.6	OVERLOAD	0	0	0	0	0	0	0
	2018-08-15 08:41:37	209	20.89	20.32	0.57	0.1	176	0.042	0.535	0.493	0	0.843	1	0.6	OVERLOAD	0	0	0	0	0	0	0
	2018-08-15 08:41:52	212	20.89	20.31	0.57	0.1	178	0.042	0.541	0.499	0	0.844	1	0.6	OVERLOAD	0	0	0	0	0	0	0
	2018-08-15 08:42:07	212	20.89	20.31	0.57	0.1	179	0.042	0.542	0.5	0	0.844	1	0.6	OVERLOAD	0	0	0	0	0	0	0
20 meter/min & 25 degrees	2018-08-15 08:42:22	214	20.89	20.31	0.58	0.1	181	0.042	0.546	0.504	0	0.845	1	0.6	OVERLOAD	0	0	0	0	0	0	0
	2018-08-15 08:42:37	214	20.89	20.31	0.58	0.1	179	0.042	0.543	0.501	0	0.84	1	0.6	OVERLOAD	0	0	0	0	0	0	0
	2018-08-15 08:42:52	213	20.89	20.31	0.58	0.1	181	0.042	0.546	0.504	0	0.847	1	0.6	OVERLOAD	0	0	0	0	0	0	0
	2018-08-15 08:43:07	217	20.89	20.3	0.59	0.1	186	0.042	0.562	0.52	0	0.856	1.1	0.6	OVERLOAD	0	0	0	0	0	0	0
	2018-08-15 08:43:22	223	20.89	20.28	0.6	0.1	193	0.042	0.581	0.539	0	0.867	1.1	0.6	OVERLOAD	0	0	0	0	0	0	0
	2018-08-15 08:43:37	225	20.89	20.27	0.61	0.1	200	0.042	0.6	0.558	0	0.889	1.1	0.6	OVERLOAD	0	0	0	0	0	0	0
	2018-08-15 08:43:52	232	20.89	20.25	0.64	0.1	213	0.042	0.637	0.595	0.1	0.919	1.1	0.6	OVERLOAD	0	0	0	0	0	0	0
	2018-08-15 08:44:07	242	20.89	20.22	0.67	0.1	225	0.042	0.672	0.63	0.1	0.931	1.2	0.6	OVERLOAD	0	0	0	0	0	0	0
20 meter/min & 25 degrees	2018-08-15 08:44:22	243	20.89	20.21	0.67	0.1	233	0.042	0.694	0.652	0.1	0.961	1.2	0.6	OVERLOAD	0	0	0	0	0	0	0
	2018-08-15 08:44:37	251	20.89	20.19	0.7	0.1	247	0.042	0.732	0.69	0.1	0.986	1.3	0.6	OVERLOAD	0	0	0	0	0	0	0
	2018-08-15 08:44:52	243	20.89	20.22	0.66	0.1	217	0.042	0.647	0.605	0.1	0.893	1.2	0.6	OVERLOAD	0	0	0	0	0	0	0

[truncated: 7 more sheets: 2- S1191, 3- S1192, 4- S1193, 5- S1194, 6- S1195, 7- S1196, 8- S1199]
