# Supplementary material for: Increased mTOR activity and metabolic efficiency in mouse and human cells containing the African-centric tumor-predisposing p53 variant Pro47Ser
Source: eLife. 2020 Nov 10;9:e55994. doi: 10.7554/eLife.55994 (PMC7661039; doi:10.7554/eLife.55994)
Supplement: Figure 6—source data 2. [file elife-55994-fig6-data2.xlsx]

## Sheet: MRI
University of Pennsylvania Diabetes Research Center- Mouse Metabolic Phenotyping Core
			Director: Joseph Baur, PhD
			baur@pennmedicine.upenn.edu
MRI
	Date:	2018-09-25
	PI:	Murphy
	Requestor:	Murphy
	Performed by:	Xiaoyan
	Cage #	Mouse ID	Gender	Weight (g)	Fat (g)	Lean (g)	Fat (% BW)
	P47	1- no Tag	M	27.09	1.45	24.45	5.35253
		2-P1183	M	27.63	1.62	24.74	5.86319
		3-P1184	M	23.95	1.06	21.79	4.42589
		4-P1185	M	26.35	1.07	24.41	4.06072
		5-P1186	M	24.21	1.36	21.75	5.61751
		6-P1187	M	23.96	1.06	22.07	4.42404
		7-P1188	M	25.01	1.53	22.03	6.11755
	S47	1-S1190	M	31.54	3.07	27.8	9.73367
		2-S1191	M	31.95	2.59	28.02	8.10642
		3-S1192	M	31.23	4.17	26.45	13.3525
		4-S1193	M	30.49	2.58	26.62	8.46179
		5-S1194	M	31.01	1.87	28.34	6.03031
		6-S1195	M	29.5	2.24	25.94	7.59322
		7-S1196	M	29.73	1.97	26.91	6.6263
		8-S1199	M	30.85	2.21	27.71	7.1637

## Sheet: Lactate  & Glucose  
		15 mice Treadmill Lactate & Glucose test 9-27 &28 -2018
			treadmill day	before treadmill	After traedmill	before treadmill	After traedmill
	ID	#	Weight (g)	Lactate	Lactate	Glucose(mg/dl)	Glucose(mg/dl)
	1- no Tag	1	27.65	1.5	3.8	160	115
	2-P1183	2	27.99	2.6	2.7	90	79
	3-P1184	3	24.8	2	1.9	118	97
	4-P1185	4	27.23	1.7	2.1	117	107
	5-P1186	5	24.21	1.2	2.2	163	171
	6-P1187	6	23.96	2.3	1.7	195	111
	7-P1188	7	25.01	2.8	2.3	163	123
	1- S1190	8	31.93	1.3	2.8	131	123
	2- S1191	9	32.4	1.4	2.1	110	98
	3- S1192	10	31.35	2.8	1.9	105	76
	4- S1193	11	31.9	1.8	2.3	147	67
	5- S1194	12	31.01	1.9	3.1	188	141
	6- S1195	13	29.5	1.7	2.7	110	101
	7- S1196	14	29.73	4.5	4.8	129	108
	8- S1199	15	30.85	3.5	1.5	113	74
	Glucose		Before	After
		WT	143.714	114.714
		S47	129.125	98.5
			Before	After
	Lactate	WT	2.01429	2.38571
		S47	2.3625	2.65

## Sheet: 1- no Tag
	Subject ID	1- no Tag
	Weight(g)	27.65
	Sex	Male
	Genotype
	Diet	Chow
===============	===============	===============	===============	===============	===============	===============	===============	===============	===============	===============	===============	===============	===============	===============	===============	===============	===============	===============	===============	===============	===============	===============
	DATE/TIME	VO2	O2IN	O2OUT	DO2	ACCO2	VCO2	CO2IN	CO2OUT	DCO2	ACCCO2	RER	HEAT	FLOW	STATUS1	FEED1	FEED1 ACC	DRINK1	DRINK1 ACC	XTOT	XAMB	ZTOT
===============		ml/hr	%	%		l	ml/hr	%	%		l		kcal/hr	LPM		GRAMS	GRAMS	ml	ml	COUNTS	COUNTS	COUNTS
15 meter/min	2018-09-27 09:15:23	174	20.97	20.51	0.46	0	128	0.043	0.401	0.358	0	0.735	0.8	0.6	OVERLOAD	0	0	0	0	0	0	0
	2018-09-27 09:17:23	191	20.97	20.46	0.5	0	140	0.043	0.435	0.392	0	0.734	0.9	0.6	OVERLOAD	0	0	0	0	0	0	0
	2018-09-27 09:19:23	198	20.97	20.44	0.52	0	147	0.043	0.453	0.41	0	0.74	0.9	0.6	OVERLOAD	0	0	0	0	0	0	0
	2018-09-27 09:21:23	198	20.97	20.45	0.52	0	146	0.043	0.451	0.408	0	0.739	0.9	0.6	OVERLOAD	0	0	0	0	0	0	0
	2018-09-27 09:23:23	201	20.97	20.44	0.53	0	150	0.043	0.461	0.418	0	0.743	1	0.6	OVERLOAD	0	0	0	0	0	0	0
	2018-09-27 09:25:23	202	20.97	20.43	0.53	0	150	0.043	0.463	0.42	0	0.744	1	0.6	OVERLOAD	0	0	0	0	0	0	0
	2018-09-27 09:27:23	202	20.97	20.43	0.53	0	149	0.043	0.46	0.417	0	0.739	1	0.6	OVERLOAD	0	0	0	0	0	0	0
	2018-09-27 09:29:23	202	20.97	20.43	0.53	0.1	149	0.043	0.459	0.416	0	0.736	1	0.6	OVERLOAD	0	0	0	0	0	0	0
	2018-09-27 09:31:23	197	20.97	20.45	0.52	0.1	146	0.043	0.452	0.409	0	0.741	0.9	0.6	OVERLOAD	0	0	0	0	0	0	0
	2018-09-27 09:33:23	198	20.97	20.45	0.52	0.1	145	0.043	0.448	0.405	0.1	0.732	0.9	0.6	OVERLOAD	0	0	0	0	0	0	0
	2018-09-27 09:35:23	198	20.97	20.44	0.52	0.1	147	0.043	0.453	0.41	0.1	0.74	0.9	0.6	OVERLOAD	0	0	0	0	0	0	0
	2018-09-27 09:37:23	191	20.97	20.46	0.5	0.1	141	0.043	0.437	0.394	0.1	0.738	0.9	0.6	OVERLOAD	0	0	0	0	0	0	0
	2018-09-27 09:39:23	193	20.97	20.46	0.51	0.1	141	0.043	0.436	0.393	0.1	0.729	0.9	0.6	OVERLOAD	0	0	0	0	1	1	4
	2018-09-27 09:41:23	191	20.97	20.46	0.5	0.1	141	0.043	0.438	0.395	0.1	0.741	0.9	0.6	OVERLOAD	0	0	0	0	0	0	0
	2018-09-27 09:43:23	190	20.97	20.47	0.5	0.1	139	0.043	0.433	0.39	0.1	0.734	0.9	0.6	OVERLOAD	0	0	0	0	0	0	0
	2018-09-27 09:45:23	184	20.97	20.48	0.49	0.1	137	0.043	0.426	0.383	0.1	0.743	0.9	0.6	OVERLOAD	0	0	0	0	0	0	0
	2018-09-27 09:47:23	183	20.97	20.48	0.49	0.1	138	0.043	0.428	0.385	0.1	0.75	0.9	0.6	OVERLOAD	0	0	0	0	0	0	0
	2018-09-27 09:49:23	181	20.97	20.49	0.48	0.1	137	0.043	0.426	0.383	0.1	0.757	0.9	0.6	OVERLOAD	0	0	0	0	0	0	0
	2018-09-27 09:51:23	178	20.97	20.5	0.47	0.1	135	0.043	0.421	0.378	0.1	0.761	0.8	0.6	OVERLOAD	0	0	0	0	0	0	0
	2018-09-27 09:53:23	180	20.97	20.49	0.48	0.1	137	0.043	0.426	0.383	0.1	0.761	0.9	0.6	OVERLOAD	0	0	0	0	0	0	0
	2018-09-27 09:55:23	176	20.97	20.5	0.47	0.1	133	0.043	0.416	0.373	0.1	0.759	0.8	0.6	OVERLOAD	0	0	0	0	0	0	0
	2018-09-27 09:57:23	177	20.97	20.5	0.47	0.1	136	0.043	0.423	0.38	0.1	0.77	0.8	0.6	OVERLOAD	0	0	0	0	0	0	0
	2018-09-27 09:59:23	176	20.97	20.5	0.47	0.1	135	0.043	0.42	0.377	0.1	0.767	0.8	0.6	OVERLOAD	0	0	0	0	0	0	0
	2018-09-27 10:01:23	174	20.97	20.5	0.46	0.2	134	0.043	0.419	0.376	0.1	0.771	0.8	0.6	OVERLOAD	0	0	0	0	0	0	0
	2018-09-27 10:03:23	173	20.97	20.51	0.46	0.2	134	0.043	0.418	0.375	0.1	0.776	0.8	0.6	OVERLOAD	0	0	0	0	0	0	0
	2018-09-27 10:05:23	170	20.97	20.51	0.45	0.2	132	0.043	0.413	0.37	0.1	0.778	0.8	0.6	OVERLOAD	0	0	0	0	0	0	0
	2018-09-27 10:07:23	169	20.97	20.52	0.45	0.2	132	0.043	0.412	0.369	0.1	0.783	0.8	0.6	OVERLOAD	0	0	0	0	0	0	0
	2018-09-27 10:09:23	168	20.97	20.52	0.45	0.2	131	0.043	0.409	0.366	0.1	0.781	0.8	0.6	OVERLOAD	0	0	0	0	0	0	0
	2018-09-27 10:11:23	168	20.97	20.52	0.45	0.2	132	0.043	0.411	0.368	0.1	0.785	0.8	0.6	OVERLOAD	0	0	0	0	0	0	0
	2018-09-27 10:13:23	161	20.97	20.54	0.43	0.2	127	0.043	0.398	0.355	0.1	0.787	0.8	0.6	OVERLOAD	0	0	0	0	0	0	0
	2018-09-27 10:15:23	159	20.97	20.54	0.43	0.2	126	0.043	0.394	0.351	0.1	0.79	0.8	0.6	OVERLOAD	0	0	0	0	0	0	0
	2018-09-27 10:17:23	163	20.97	20.53	0.44	0.2	129	0.043	0.404	0.361	0.2	0.79	0.8	0.6	OVERLOAD	0	0	0	0	0	0	0
	2018-09-27 10:19:23	153	20.97	20.56	0.41	0.2	121	0.043	0.382	0.339	0.2	0.792	0.7	0.6	OVERLOAD	0	0	0	0	0	0	0
	2018-09-27 10:21:23	149	20.97	20.57	0.4	0.2	119	0.043	0.374	0.331	0.2	0.798	0.7	0.6	OVERLOAD	0	0	0	0	0	0	0
	2018-09-27 10:23:23	151	20.97	20.56	0.4	0.2	121	0.043	0.382	0.339	0.2	0.803	0.7	0.6	OVERLOAD	0	0	0	0	0	0	0
	2018-09-27 10:25:23	152	20.97	20.56	0.41	0.2	121	0.043	0.381	0.338	0.2	0.797	0.7	0.6	OVERLOAD	0	0	0	0	0	0	0
	2018-09-27 10:27:23	151	20.97	20.56	0.4	0.2	121	0.043	0.38	0.337	0.2	0.8	0.7	0.6	OVERLOAD	0	0	0	0	0	0	0
	2018-09-27 10:29:23	149	20.97	20.57	0.4	0.2	120	0.043	0.378	0.335	0.2	0.804	0.7	0.6	OVERLOAD	0	0	0	0	0	0	0
	2018-09-27 10:31:23	147	20.97	20.57	0.39	0.2	118	0.043	0.374	0.331	0.2	0.807	0.7	0.6	OVERLOAD	0	0	0	0	0	0	0
	2018-09-27 10:33:23	145	20.97	20.58	0.39	0.2	118	0.043	0.372	0.329	0.2	0.812	0.7	0.6	OVERLOAD	0	0	0	0	0	0	0
	2018-09-27 10:35:23	146	20.97	20.57	0.4	0.2	123	0.043	0.387	0.344	0.2	0.841	0.7	0.6	OVERLOAD	0	0	0	0	0	0	0
	2018-09-27 10:37:23	146	20.97	20.58	0.39	0.2	120	0.043	0.377	0.334	0.2	0.818	0.7	0.6	OVERLOAD	0	0	0	0	0	0	0
	2018-09-27 10:39:23	145	20.97	20.58	0.39	0.3	121	0.043	0.382	0.339	0.2	0.836	0.7	0.6	OVERLOAD	0	0	0	0	0	0	0
	2018-09-27 10:41:23	146	20.97	20.58	0.39	0.3	119	0.043	0.375	0.332	0.2	0.812	0.7	0.6	OVERLOAD	0	0	0	0	0	0	0
	2018-09-27 10:43:23	144	20.97	20.58	0.39	0.3	118	0.043	0.372	0.329	0.2	0.819	0.7	0.6	OVERLOAD	0	0	0	0	0	0	0

## Sheet: 2-P1183
	Subject ID	2-P1183
	Weight(g)	27.99
	Sex	Male
	Genotype
	Diet	Chow
===============	===============	===============	===============	===============	===============	===============	===============	===============	===============	===============	===============	===============	===============	===============	===============	===============	===============	===============	===============	===============	===============	===============
	DATE/TIME	VO2	O2IN	O2OUT	DO2	ACCO2	VCO2	CO2IN	CO2OUT	DCO2	ACCCO2	RER	HEAT	FLOW	STATUS1	FEED1	FEED1 ACC	DRINK1	DRINK1 ACC	XTOT	XAMB	ZTOT
===============		ml/hr	%	%		l	ml/hr	%	%		l		kcal/hr	LPM		GRAMS	GRAMS	ml	ml	COUNTS	COUNTS	COUNTS
15 meter/min	2018-09-27 11:21:28	122	20.94	20.61	0.33	0	99	0.04	0.317	0.277	0	0.812	0.6	0.6	OVERLOAD	0	0	0	0	0	0	0
	2018-09-27 11:23:28	162	20.94	20.51	0.43	0	126	0.04	0.393	0.353	0	0.778	0.8	0.6	OVERLOAD	0	0	0	0	0	0	0
	2018-09-27 11:25:28	173	20.94	20.48	0.46	0	131	0.04	0.406	0.366	0	0.755	0.8	0.6	OVERLOAD	0	0	0	0	0	0	0
	2018-09-27 11:27:28	171	20.94	20.49	0.45	0	126	0.04	0.393	0.353	0	0.737	0.8	0.6	OVERLOAD	0	0	0	0	0	0	0
	2018-09-27 11:29:28	169	20.94	20.49	0.45	0	124	0.04	0.386	0.346	0	0.732	0.8	0.6	OVERLOAD	0	0	0	0	0	0	0
	2018-09-27 11:31:28	169	20.94	20.5	0.45	0	124	0.04	0.387	0.347	0	0.735	0.8	0.6	OVERLOAD	0	0	0	0	0	0	0
	2018-09-27 11:33:28	170	20.94	20.49	0.45	0	125	0.04	0.388	0.348	0	0.732	0.8	0.6	OVERLOAD	0	0	0	0	0	0	0
	2018-09-27 11:35:28	167	20.94	20.5	0.44	0	121	0.04	0.377	0.337	0	0.721	0.8	0.6	OVERLOAD	0	0	0	0	0	0	0
	2018-09-27 11:37:28	168	20.94	20.5	0.44	0	121	0.04	0.379	0.339	0	0.724	0.8	0.6	OVERLOAD	0	0	0	0	0	0	0
	2018-09-27 11:39:28	168	20.94	20.5	0.44	0.1	121	0.04	0.378	0.338	0	0.72	0.8	0.6	OVERLOAD	0	0	0	0	0	0	0
	2018-09-27 11:41:28	168	20.94	20.5	0.44	0.1	120	0.04	0.376	0.336	0	0.717	0.8	0.6	OVERLOAD	0	0	0	0	0	0	0
	2018-09-27 11:43:28	166	20.94	20.51	0.44	0.1	119	0.04	0.372	0.332	0	0.715	0.8	0.6	OVERLOAD	0	0	0	0	0	0	0
	2018-09-27 11:45:28	163	20.94	20.51	0.43	0.1	116	0.04	0.365	0.325	0	0.712	0.8	0.6	OVERLOAD	0	0	0	0	0	0	0
	2018-09-27 11:47:28	171	20.94	20.49	0.45	0.1	126	0.04	0.391	0.351	0.1	0.736	0.8	0.6	OVERLOAD	0	0	0	0	0	0	0
	2018-09-27 11:49:28	162	20.94	20.51	0.43	0.1	118	0.04	0.371	0.331	0.1	0.731	0.8	0.6	OVERLOAD	0	0	0	0	0	0	0
	2018-09-27 11:51:28	160	20.94	20.52	0.42	0.1	118	0.04	0.369	0.329	0.1	0.734	0.8	0.6	OVERLOAD	0	0	0	0	0	0	0
	2018-09-27 11:53:28	164	20.94	20.51	0.43	0.1	118	0.04	0.371	0.331	0.1	0.721	0.8	0.6	OVERLOAD	0	0	0.02	0.02	0	0	0
	2018-09-27 11:55:28	160	20.94	20.52	0.42	0.1	119	0.04	0.373	0.333	0.1	0.743	0.8	0.6	OVERLOAD	0	0	0	0.02	0	0	0
	2018-09-27 11:57:28	166	20.94	20.51	0.44	0.1	120	0.04	0.374	0.334	0.1	0.722	0.8	0.6	OVERLOAD	0	0	0	0.02	0	0	0
	2018-09-27 11:59:28	164	20.94	20.51	0.43	0.1	120	0.04	0.375	0.335	0.1	0.731	0.8	0.6	OVERLOAD	0	0	0	0.02	0	0	0
	2018-09-27 12:01:28	173	20.94	20.49	0.46	0.1	127	0.04	0.394	0.354	0.1	0.733	0.8	0.6	OVERLOAD	0	0	0	0.02	0	0	0
	2018-09-27 12:03:28	164	20.94	20.51	0.44	0.1	124	0.04	0.386	0.346	0.1	0.753	0.8	0.6	OVERLOAD	0	0	0	0.02	0	0	0
	2018-09-27 12:05:28	164	20.94	20.51	0.43	0.1	121	0.04	0.378	0.338	0.1	0.737	0.8	0.6	OVERLOAD	0	0	0	0.02	0	0	0
	2018-09-27 12:07:28	165	20.94	20.51	0.43	0.1	118	0.04	0.371	0.331	0.1	0.718	0.8	0.6	OVERLOAD	0	0	0	0.02	0	0	0
	2018-09-27 12:09:28	169	20.94	20.49	0.45	0.1	127	0.04	0.394	0.354	0.1	0.748	0.8	0.6	OVERLOAD	0	0	0	0.02	0	0	0
	2018-09-27 12:11:28	165	20.94	20.5	0.44	0.1	123	0.04	0.384	0.344	0.1	0.746	0.8	0.6	OVERLOAD	0	0	0	0.02	0	0	0
	2018-09-27 12:13:28	161	20.94	20.52	0.42	0.1	119	0.04	0.373	0.333	0.1	0.742	0.8	0.6	OVERLOAD	0	0	0	0.02	0	0	0
	2018-09-27 12:15:28	160	20.94	20.52	0.42	0.1	119	0.04	0.371	0.331	0.1	0.74	0.8	0.6	OVERLOAD	0	0	0	0.02	0	0	0
	2018-09-27 12:17:28	163	20.94	20.51	0.43	0.2	120	0.04	0.374	0.334	0.1	0.732	0.8	0.6	OVERLOAD	0	0	0	0.02	0	0	0
	2018-09-27 12:19:28	167	20.94	20.5	0.44	0.2	123	0.04	0.383	0.343	0.1	0.736	0.8	0.6	OVERLOAD	0	0	0	0.02	0	0	0
	2018-09-27 12:21:28	164	20.94	20.51	0.43	0.2	121	0.04	0.378	0.338	0.1	0.735	0.8	0.6	OVERLOAD	0	0	0	0.02	0	0	0
	2018-09-27 12:23:28	161	20.94	20.52	0.43	0.2	119	0.04	0.372	0.332	0.1	0.736	0.8	0.6	OVERLOAD	0	0	0	0.02	0	0	0
	2018-09-27 12:25:28	163	20.94	20.51	0.43	0.2	120	0.04	0.375	0.335	0.1	0.737	0.8	0.6	OVERLOAD	0	0	0	0.02	0	0	0
	2018-09-27 12:27:28	162	20.94	20.51	0.43	0.2	120	0.04	0.375	0.335	0.1	0.739	0.8	0.6	OVERLOAD	0	0	0	0.02	0	0	0
	2018-09-27 12:29:28	156	20.94	20.53	0.41	0.2	116	0.04	0.363	0.323	0.1	0.741	0.7	0.6	OVERLOAD	0	0	0	0.02	0	0	0
	2018-09-27 12:31:28	156	20.94	20.53	0.41	0.2	116	0.04	0.364	0.324	0.1	0.744	0.7	0.6	OVERLOAD	0	0	0	0.02	0	0	0
	2018-09-27 12:33:28	154	20.94	20.53	0.41	0.2	112	0.04	0.352	0.312	0.1	0.724	0.7	0.6	OVERLOAD	0	0	0	0.02	0	0	0
	2018-09-27 12:35:28	154	20.94	20.53	0.41	0.2	112	0.04	0.354	0.314	0.1	0.727	0.7	0.6	OVERLOAD	0	0	0	0.02	0	0	0
	2018-09-27 12:37:28	153	20.94	20.54	0.4	0.2	111	0.04	0.352	0.312	0.2	0.731	0.7	0.6	OVERLOAD	0	0	0	0.02	0	0	0
	2018-09-27 12:39:28	150	20.94	20.55	0.4	0.2	109	0.04	0.345	0.305	0.2	0.725	0.7	0.6	OVERLOAD	0	0	0	0.02	0	0	0
	2018-09-27 12:41:28	142	20.94	20.57	0.37	0.2	102	0.04	0.326	0.286	0.2	0.719	0.7	0.6	OVERLOAD	0	0	0	0.02	0	0	0
	2018-09-27 12:43:28	152	20.94	20.54	0.4	0.2	111	0.04	0.349	0.309	0.2	0.727	0.7	0.6	OVERLOAD	0	0	0	0.02	0	0	0
	2018-09-27 12:45:28	148	20.94	20.55	0.39	0.2	107	0.04	0.34	0.3	0.2	0.726	0.7	0.6	OVERLOAD	0	0	0	0.02	0	0	0
	2018-09-27 12:47:28	158	20.94	20.52	0.42	0.2	116	0.04	0.364	0.324	0.2	0.735	0.7	0.6	OVERLOAD	0	0	0	0.02	0	0	0
	2018-09-27 12:49:28	149	20.94	20.55	0.39	0.2	110	0.04	0.348	0.308	0.2	0.742	0.7	0.6	OVERLOAD	0	0	0	0.02	0	0	0

## Sheet: 3-P1184
	Subject ID	3-P1184
	Weight(g)	24.8
	Sex	Male
	Genotype
	Diet	Chow
===============	===============	===============	===============	===============	===============	===============	===============	===============	===============	===============	===============	===============	===============	===============	===============	===============	===============	===============	===============	===============	===============	===============
	DATE/TIME	VO2	O2IN	O2OUT	DO2	ACCO2	VCO2	CO2IN	CO2OUT	DCO2	ACCCO2	RER	HEAT	FLOW	STATUS1	FEED1	FEED1 ACC	DRINK1	DRINK1 ACC	XTOT	XAMB	ZTOT
===============		ml/hr	%	%		l	ml/hr	%	%		l		kcal/hr	LPM		GRAMS	GRAMS	ml	ml	COUNTS	COUNTS	COUNTS
15 meter/min	2018-09-27 13:05:31	133	20.91	20.55	0.36	0	108	0.048	0.351	0.303	0	0.814	0.6	0.6	OVERLOAD	0	0	0	0	0	0	0
	2018-09-27 13:07:31	145	20.91	20.52	0.39	0	116	0.048	0.371	0.323	0	0.798	0.7	0.6	OVERLOAD	0	0	0	0	0	0	0
	2018-09-27 13:09:31	144	20.91	20.52	0.39	0	117	0.048	0.374	0.326	0	0.811	0.7	0.6	OVERLOAD	0	0	0	0	0	0	0
	2018-09-27 13:11:31	144	20.91	20.53	0.39	0	117	0.048	0.374	0.326	0	0.813	0.7	0.6	OVERLOAD	0	0	0	0	0	0	0
	2018-09-27 13:13:31	140	20.91	20.54	0.37	0	113	0.048	0.365	0.317	0	0.812	0.7	0.6	OVERLOAD	0	0	0	0	0	0	0
	2018-09-27 13:15:31	138	20.91	20.54	0.37	0	114	0.048	0.365	0.317	0	0.822	0.7	0.6	OVERLOAD	0	0	0	0	0	0	0
	2018-09-27 13:17:31	139	20.91	20.54	0.37	0	115	0.048	0.369	0.321	0	0.827	0.7	0.6	OVERLOAD	0	0	0	0	0	0	0
	2018-09-27 13:19:31	136	20.91	20.55	0.36	0	111	0.048	0.357	0.309	0	0.817	0.7	0.6	OVERLOAD	0	0	0	0	0	0	0
	2018-09-27 13:21:31	132	20.91	20.56	0.35	0	108	0.048	0.348	0.3	0	0.815	0.6	0.6	OVERLOAD	0	0	0	0	0	0	0
	2018-09-27 13:23:31	131	20.91	20.56	0.35	0	107	0.048	0.345	0.298	0	0.813	0.6	0.6	OVERLOAD	0	0	0	0	0	0	0
	2018-09-27 13:25:31	131	20.91	20.56	0.35	0	106	0.048	0.344	0.297	0	0.813	0.6	0.6	OVERLOAD	0	0	0	0	0	0	0
	2018-09-27 13:27:31	130	20.91	20.56	0.35	0.1	106	0.048	0.345	0.297	0	0.82	0.6	0.6	OVERLOAD	0	0	0	0	0	0	0
	2018-09-27 13:29:31	129	20.91	20.56	0.35	0.1	105	0.048	0.342	0.294	0	0.816	0.6	0.6	OVERLOAD	0	0	0	0	0	0	0
	2018-09-27 13:31:31	128	20.91	20.57	0.34	0.1	104	0.048	0.338	0.29	0	0.812	0.6	0.6	OVERLOAD	0	0	0	0	0	0	0
	2018-09-27 13:33:31	126	20.91	20.57	0.34	0.1	102	0.048	0.332	0.284	0.1	0.808	0.6	0.6	OVERLOAD	0	0	0	0	0	0	0
	2018-09-27 13:35:31	125	20.91	20.57	0.34	0.1	102	0.048	0.334	0.286	0.1	0.817	0.6	0.6	OVERLOAD	0	0	0	0	0	0	0
	2018-09-27 13:37:31	127	20.91	20.57	0.34	0.1	102	0.048	0.334	0.286	0.1	0.806	0.6	0.6	OVERLOAD	0	0	0	0	0	0	0
	2018-09-27 13:39:31	125	20.91	20.58	0.34	0.1	101	0.048	0.33	0.282	0.1	0.808	0.6	0.6	OVERLOAD	0	0	0	0	0	0	0
	2018-09-27 13:41:31	122	20.91	20.58	0.33	0.1	98	0.048	0.322	0.274	0.1	0.805	0.6	0.6	OVERLOAD	0	0	0	0	0	0	0
	2018-09-27 13:43:31	122	20.91	20.58	0.33	0.1	98	0.048	0.321	0.273	0.1	0.803	0.6	0.6	OVERLOAD	0	0	0	0	0	0	0
	2018-09-27 13:45:31	122	20.91	20.58	0.33	0.1	98	0.048	0.322	0.275	0.1	0.806	0.6	0.6	OVERLOAD	0	0	0	0	0	0	0
	2018-09-27 13:47:31	123	20.91	20.58	0.33	0.1	98	0.048	0.323	0.275	0.1	0.803	0.6	0.6	OVERLOAD	0	0	0	0	0	0	0
	2018-09-27 13:49:31	120	20.91	20.59	0.32	0.1	96	0.048	0.316	0.269	0.1	0.801	0.6	0.6	OVERLOAD	0	0	0	0	0	0	0
	2018-09-27 13:51:31	126	20.91	20.57	0.34	0.1	104	0.048	0.338	0.29	0.1	0.825	0.6	0.6	OVERLOAD	0	0	0	0	0	0	0
	2018-09-27 13:53:31	131	20.91	20.56	0.35	0.1	105	0.048	0.342	0.294	0.1	0.807	0.6	0.6	OVERLOAD	0	0	0	0	0	0	0
	2018-09-27 13:55:31	128	20.91	20.57	0.34	0.1	103	0.048	0.335	0.287	0.1	0.8	0.6	0.6	OVERLOAD	0	0	0	0	0	0	0
	2018-09-27 13:57:31	128	20.91	20.57	0.34	0.1	102	0.048	0.334	0.286	0.1	0.8	0.6	0.6	OVERLOAD	0	0	0	0	0	0	0
	2018-09-27 13:59:31	123	20.91	20.58	0.33	0.1	100	0.048	0.327	0.279	0.1	0.816	0.6	0.6	OVERLOAD	0	0	0	0	0	0	0
	2018-09-27 14:01:31	124	20.91	20.58	0.33	0.1	100	0.048	0.326	0.279	0.1	0.804	0.6	0.6	OVERLOAD	0	0	0	0	0	0	0
	2018-09-27 14:03:31	125	20.91	20.58	0.34	0.1	100	0.048	0.328	0.28	0.1	0.8	0.6	0.6	OVERLOAD	0	0	0	0	0	0	0
	2018-09-27 14:05:31	125	20.91	20.58	0.33	0.1	99	0.048	0.324	0.277	0.1	0.795	0.6	0.6	OVERLOAD	0	0	0	0	0	0	0
	2018-09-27 14:07:31	125	20.91	20.58	0.33	0.1	100	0.048	0.326	0.278	0.1	0.797	0.6	0.6	OVERLOAD	0	0	0	0	0	0	0
	2018-09-27 14:09:31	123	20.91	20.58	0.33	0.1	97	0.048	0.319	0.271	0.1	0.79	0.6	0.6	OVERLOAD	0	0	0	0	0	0	0
	2018-09-27 14:11:31	121	20.91	20.59	0.32	0.1	96	0.048	0.315	0.267	0.1	0.791	0.6	0.6	OVERLOAD	0	0	0	0	0	0	0
	2018-09-27 14:13:31	121	20.91	20.59	0.32	0.1	95	0.048	0.313	0.266	0.1	0.785	0.6	0.6	OVERLOAD	0	0	0	0	0	0	0
	2018-09-27 14:15:31	124	20.91	20.58	0.33	0.2	99	0.048	0.325	0.277	0.1	0.799	0.6	0.6	OVERLOAD	0	0	0	0	0	0	0
	2018-09-27 14:17:31	128	20.91	20.57	0.34	0.2	100	0.048	0.326	0.278	0.1	0.779	0.6	0.6	OVERLOAD	0	0	0	0	0	0	0
	2018-09-27 14:19:31	126	20.91	20.57	0.34	0.2	99	0.048	0.324	0.276	0.1	0.783	0.6	0.6	OVERLOAD	0	0	0	0	0	0	0
	2018-09-27 14:21:31	126	20.91	20.57	0.34	0.2	98	0.048	0.323	0.275	0.1	0.78	0.6	0.6	OVERLOAD	0	0	0	0	0	0	0
	2018-09-27 14:23:31	126	20.91	20.57	0.34	0.2	99	0.048	0.323	0.275	0.1	0.781	0.6	0.6	OVERLOAD	0	0	0	0	0	0	0
	2018-09-27 14:25:31	124	20.91	20.58	0.33	0.2	97	0.048	0.319	0.271	0.1	0.782	0.6	0.6	OVERLOAD	0	0	0	0	0	0	0
	2018-09-27 14:27:31	123	20.91	20.58	0.33	0.2	96	0.048	0.317	0.269	0.1	0.784	0.6	0.6	OVERLOAD	0	0	0	0	0	0	0
	2018-09-27 14:29:31	123	20.91	20.58	0.33	0.2	97	0.048	0.32	0.272	0.1	0.793	0.6	0.6	OVERLOAD	0	0	0	0	0	0	0
	2018-09-27 14:31:31	126	20.91	20.58	0.34	0.2	98	0.048	0.322	0.274	0.1	0.779	0.6	0.6	OVERLOAD	0	0	0	0	0	0	0
	2018-09-27 14:33:31	127	20.91	20.57	0.34	0.2	99	0.048	0.325	0.278	0.2	0.784	0.6	0.6	OVERLOAD	0	0	0	0	0	0	0

## Sheet: 4-P1185
	Subject ID	4-P1185
	Weight(g)	27.23
	Sex	Male
	Genotype
	Diet	Chow
===============	===============	===============	===============	===============	===============	===============	===============	===============	===============	===============	===============	===============	===============	===============	===============	===============	===============	===============	===============	===============	===============	===============
	DATE/TIME	VO2	O2IN	O2OUT	DO2	ACCO2	VCO2	CO2IN	CO2OUT	DCO2	ACCCO2	RER	HEAT	FLOW	STATUS1	FEED1	FEED1 ACC	DRINK1	DRINK1 ACC	XTOT	XAMB	ZTOT
===============		ml/hr	%	%		l	ml/hr	%	%		l		kcal/hr	LPM		GRAMS	GRAMS	ml	ml	COUNTS	COUNTS	COUNTS
15 meter/min	2018-09-27 14:50:59	151	20.91	20.51	0.41	0	123	0.048	0.392	0.344	0	0.813	0.7	0.6	OVERLOAD	0	0	0	0	0	0	0
	2018-09-27 14:52:59	151	20.91	20.51	0.4	0	120	0.048	0.382	0.334	0	0.793	0.7	0.6	OVERLOAD	0	0	0	0	0	0	0
	2018-09-27 14:54:59	149	20.91	20.51	0.4	0	120	0.048	0.383	0.335	0	0.802	0.7	0.6	OVERLOAD	0	0	0	0	0	0	0
	2018-09-27 14:56:59	148	20.91	20.51	0.4	0	119	0.048	0.381	0.333	0	0.803	0.7	0.6	OVERLOAD	0	0	0	0	0	0	0
	2018-09-27 14:58:59	147	20.91	20.52	0.4	0	119	0.048	0.382	0.333	0	0.81	0.7	0.6	OVERLOAD	0	0	0	0	0	0	0
	2018-09-27 15:00:59	148	20.91	20.52	0.4	0	120	0.048	0.383	0.335	0	0.81	0.7	0.6	OVERLOAD	0	0	0	0	0	0	0
	2018-09-27 15:02:59	151	20.91	20.51	0.4	0	120	0.048	0.383	0.335	0	0.797	0.7	0.6	OVERLOAD	0	0	0	0	0	0	0
	2018-09-27 15:04:59	146	20.91	20.52	0.39	0	117	0.048	0.374	0.326	0	0.799	0.7	0.6	OVERLOAD	0	0	0	0	0	0	0
	2018-09-27 15:06:59	143	20.91	20.53	0.38	0	112	0.048	0.362	0.314	0	0.788	0.7	0.6	OVERLOAD	0	0	0	0	0	0	0
	2018-09-27 15:08:59	147	20.91	20.52	0.39	0	117	0.048	0.376	0.328	0	0.8	0.7	0.6	OVERLOAD	0	0	0	0	0	0	0
	2018-09-27 15:10:59	145	20.91	20.52	0.39	0	116	0.048	0.373	0.325	0	0.802	0.7	0.6	OVERLOAD	0	0	0	0	0	0	0
	2018-09-27 15:12:59	148	20.91	20.52	0.39	0.1	117	0.048	0.375	0.327	0	0.793	0.7	0.6	OVERLOAD	0	0	0	0	0	0	0
	2018-09-27 15:14:59	145	20.91	20.52	0.39	0.1	116	0.048	0.373	0.325	0	0.801	0.7	0.6	OVERLOAD	0	0	0	0	0	0	0
	2018-09-27 15:16:59	146	20.91	20.52	0.39	0.1	117	0.048	0.375	0.326	0.1	0.798	0.7	0.6	OVERLOAD	0	0	0	0	0	0	0
	2018-09-27 15:18:59	147	20.91	20.52	0.39	0.1	119	0.048	0.381	0.332	0.1	0.809	0.7	0.6	OVERLOAD	0	0	0	0	0	0	0
	2018-09-27 15:20:59	148	20.91	20.52	0.39	0.1	117	0.048	0.376	0.328	0.1	0.795	0.7	0.6	OVERLOAD	0	0	0	0	0	0	0
	2018-09-27 15:22:59	146	20.91	20.52	0.39	0.1	116	0.048	0.371	0.323	0.1	0.793	0.7	0.6	OVERLOAD	0	0	0	0	0	0	0
	2018-09-27 15:24:59	143	20.91	20.53	0.38	0.1	114	0.048	0.367	0.318	0.1	0.798	0.7	0.6	OVERLOAD	0	0	0	0	0	0	0
	2018-09-27 15:26:59	142	20.91	20.53	0.38	0.1	113	0.048	0.364	0.316	0.1	0.793	0.7	0.6	OVERLOAD	0	0	0	0	0	0	0
	2018-09-27 15:28:59	142	20.91	20.53	0.38	0.1	113	0.048	0.365	0.317	0.1	0.799	0.7	0.6	OVERLOAD	0	0	0	0	0	0	0
	2018-09-27 15:30:59	141	20.91	20.54	0.38	0.1	112	0.048	0.361	0.313	0.1	0.795	0.7	0.6	OVERLOAD	0	0	0	0	0	0	0
	2018-09-27 15:32:59	140	20.91	20.54	0.38	0.1	112	0.048	0.361	0.313	0.1	0.801	0.7	0.6	OVERLOAD	0	0	0	0	0	0	0
	2018-09-27 15:34:59	139	20.91	20.54	0.37	0.1	111	0.048	0.36	0.311	0.1	0.8	0.7	0.6	OVERLOAD	0	0	0	0	0	0	0
	2018-09-27 15:36:59	134	20.91	20.55	0.36	0.1	108	0.048	0.349	0.301	0.1	0.804	0.6	0.6	OVERLOAD	0	0	0	0	0	0	0
	2018-09-27 15:38:59	132	20.91	20.56	0.35	0.1	106	0.048	0.343	0.295	0.1	0.8	0.6	0.6	OVERLOAD	0	0	0	0	0	0	0
	2018-09-27 15:40:59	133	20.91	20.55	0.36	0.1	107	0.048	0.348	0.3	0.1	0.805	0.6	0.6	OVERLOAD	0	0	0	0	0	0	0
	2018-09-27 15:42:59	134	20.91	20.55	0.36	0.1	107	0.048	0.348	0.3	0.1	0.8	0.6	0.6	OVERLOAD	0	0	0	0	0	0	0
	2018-09-27 15:44:59	132	20.91	20.56	0.35	0.1	106	0.048	0.344	0.295	0.1	0.803	0.6	0.6	OVERLOAD	0	0	0	0	0	0	0
	2018-09-27 15:46:59	138	20.91	20.54	0.37	0.1	113	0.048	0.363	0.315	0.1	0.817	0.7	0.6	OVERLOAD	0	0	0	0	0	0	0
	2018-09-27 15:48:59	132	20.91	20.56	0.35	0.1	106	0.048	0.345	0.296	0.1	0.804	0.6	0.6	OVERLOAD	0	0	0	0	0	0	0
	2018-09-27 15:50:59	127	20.91	20.57	0.34	0.1	103	0.048	0.335	0.287	0.1	0.812	0.6	0.6	OVERLOAD	0	0	0	0	0	0	0
	2018-09-27 15:52:59	130	20.91	20.56	0.35	0.1	104	0.048	0.338	0.29	0.1	0.797	0.6	0.6	OVERLOAD	0	0	0	0	0	0	0
	2018-09-27 15:54:59	127	20.91	20.57	0.34	0.2	101	0.048	0.332	0.283	0.1	0.799	0.6	0.6	OVERLOAD	0	0	0	0	0	0	0
	2018-09-27 15:56:59	125	20.91	20.58	0.33	0.2	99	0.048	0.326	0.277	0.1	0.792	0.6	0.6	OVERLOAD	0	0	0	0	0	0	0
	2018-09-27 15:58:59	129	20.91	20.57	0.34	0.2	101	0.048	0.331	0.282	0.1	0.785	0.6	0.6	OVERLOAD	0	0	0	0	0	0	0
	2018-09-27 16:00:59	127	20.91	20.57	0.34	0.2	100	0.048	0.328	0.28	0.1	0.788	0.6	0.6	OVERLOAD	0	0	0	0	0	0	0
	2018-09-27 16:02:59	126	20.91	20.58	0.34	0.2	100	0.048	0.328	0.279	0.1	0.793	0.6	0.6	OVERLOAD	0	0	0	0	0	0	0
	2018-09-27 16:04:59	124	20.91	20.58	0.33	0.2	99	0.048	0.325	0.277	0.1	0.797	0.6	0.6	OVERLOAD	0	0	0	0	0	0	0
	2018-09-27 16:06:59	125	20.91	20.58	0.33	0.2	99	0.048	0.324	0.276	0.1	0.789	0.6	0.6	OVERLOAD	0	0	0	0	0	0	0
	2018-09-27 16:08:59	127	20.91	20.57	0.34	0.2	100	0.048	0.327	0.279	0.1	0.783	0.6	0.6	OVERLOAD	0	0	0	0	0	0	0
	2018-09-27 16:10:59	125	20.91	20.58	0.33	0.2	99	0.048	0.323	0.275	0.1	0.79	0.6	0.6	OVERLOAD	0	0	0	0	0	0	0
	2018-09-27 16:12:59	124	20.91	20.58	0.33	0.2	98	0.048	0.323	0.275	0.2	0.79	0.6	0.6	OVERLOAD	0	0	0	0	0	0	0
	2018-09-27 16:14:59	124	20.91	20.58	0.33	0.2	97	0.048	0.319	0.27	0.2	0.782	0.6	0.6	OVERLOAD	0	0	0	0	0	0	0
	2018-09-27 16:16:59	122	20.91	20.59	0.32	0.2	95	0.048	0.312	0.264	0.2	0.778	0.6	0.6	OVERLOAD	0	0	0	0	0	0	0
	2018-09-27 16:18:59	119	20.91	20.59	0.32	0.2	95	0.048	0.313	0.265	0.2	0.794	0.6	0.6	OVERLOAD	0	0	0	0	0	0	0
	2018-09-27 16:20:59	122	20.91	20.59	0.33	0.2	96	0.048	0.315	0.267	0.2	0.783	0.6	0.6	OVERLOAD	0	0	0	0	0	0	0

## Sheet: 5-P1186
	Subject ID	5-P1186
	Weight(g)	24.21
	Sex	Male
	Genotype
	Diet	Chow
===============	===============	===============	===============	===============	===============	===============	===============	===============	===============	===============	===============	===============	===============	===============	===============	===============	===============	===============	===============	===============	===============	===============
	DATE/TIME	VO2	O2IN	O2OUT	DO2	ACCO2	VCO2	CO2IN	CO2OUT	DCO2	ACCCO2	RER	HEAT	FLOW	STATUS1	FEED1	FEED1 ACC	DRINK1	DRINK1 ACC	XTOT	XAMB	ZTOT
===============		ml/hr	%	%		l	ml/hr	%	%		l		kcal/hr	LPM		GRAMS	GRAMS	ml	ml	COUNTS	COUNTS	COUNTS
15 meter/min	2018-09-28 08:39:32	140	20.96	20.57	0.39	0	143	0.041	0.44	0.399	0	1.024	0.7	0.6	OVERLOAD	0	0	0	0	0	0	0
	2018-09-28 08:41:32	153	20.96	20.53	0.43	0	153	0.041	0.467	0.426	0	1	0.8	0.6	OVERLOAD	0	0	0	0	0	0	0
	2018-09-28 08:43:32	155	20.96	20.53	0.43	0	150	0.041	0.462	0.42	0	0.972	0.8	0.6	OVERLOAD	0	0	0	0	0	0	0
	2018-09-28 08:45:32	156	20.96	20.53	0.43	0	146	0.041	0.45	0.409	0	0.937	0.8	0.6	OVERLOAD	0	0	0	0	0	0	0
	2018-09-28 08:47:32	150	20.96	20.55	0.41	0	136	0.041	0.422	0.381	0	0.909	0.7	0.6	OVERLOAD	0	0	0	0	0	0	0
	2018-09-28 08:49:32	151	20.96	20.55	0.41	0	136	0.041	0.42	0.379	0	0.901	0.7	0.6	OVERLOAD	0	0	0	0	0	0	0
	2018-09-28 08:51:32	151	20.96	20.55	0.41	0	138	0.041	0.426	0.384	0	0.914	0.7	0.6	OVERLOAD	0	0	0	0	0	0	0
	2018-09-28 08:53:32	151	20.96	20.55	0.41	0	138	0.041	0.428	0.386	0	0.918	0.7	0.6	OVERLOAD	0	0	0	0	0	0	0
	2018-09-28 08:55:32	150	20.96	20.55	0.41	0	137	0.041	0.423	0.381	0	0.909	0.7	0.6	OVERLOAD	0	0	0	0	0	0	0
	2018-09-28 08:57:32	147	20.96	20.56	0.4	0	132	0.041	0.41	0.369	0	0.895	0.7	0.6	OVERLOAD	0	0	0	0	0	0	0
	2018-09-28 08:59:32	148	20.96	20.56	0.4	0.1	130	0.041	0.405	0.363	0	0.881	0.7	0.6	OVERLOAD	0	0	0	0	0	0	0
	2018-09-28 09:01:32	143	20.96	20.57	0.39	0.1	125	0.041	0.392	0.35	0.1	0.88	0.7	0.6	OVERLOAD	0	0	0	0	0	0	0
	2018-09-28 09:03:32	145	20.96	20.56	0.4	0.1	127	0.041	0.397	0.355	0.1	0.876	0.7	0.6	OVERLOAD	0	0	0	0	0	0	0
	2018-09-28 09:05:32	146	20.96	20.56	0.4	0.1	129	0.041	0.401	0.36	0.1	0.879	0.7	0.6	OVERLOAD	0	0	0	0	0	0	0
	2018-09-28 09:07:32	143	20.96	20.57	0.39	0.1	126	0.041	0.393	0.351	0.1	0.883	0.7	0.6	OVERLOAD	0	0	0	0	0	0	0
	2018-09-28 09:09:32	142	20.96	20.57	0.39	0.1	125	0.041	0.389	0.348	0.1	0.876	0.7	0.6	OVERLOAD	0	0	0	0	0	0	0
	2018-09-28 09:11:32	139	20.96	20.58	0.38	0.1	122	0.041	0.383	0.342	0.1	0.877	0.7	0.6	OVERLOAD	0	0	0	0	0	0	0
	2018-09-28 09:13:32	139	20.96	20.58	0.38	0.1	121	0.041	0.38	0.339	0.1	0.874	0.7	0.6	OVERLOAD	0	0	0	0	0	0	0
	2018-09-28 09:15:32	139	20.96	20.58	0.38	0.1	122	0.041	0.383	0.341	0.1	0.881	0.7	0.6	OVERLOAD	0	0	0	0	0	0	0
	2018-09-28 09:17:32	136	20.96	20.59	0.37	0.1	120	0.041	0.376	0.334	0.1	0.88	0.7	0.6	OVERLOAD	0	0	0	0	0	0	0
	2018-09-28 09:19:32	131	20.96	20.6	0.35	0.1	114	0.041	0.361	0.319	0.1	0.876	0.6	0.6	OVERLOAD	0	0	0	0	0	0	0
	2018-09-28 09:21:32	135	20.96	20.59	0.37	0.1	120	0.041	0.378	0.336	0.1	0.888	0.7	0.6	OVERLOAD	0	0	0	0	0	0	0
	2018-09-28 09:23:32	132	20.96	20.6	0.36	0.1	119	0.041	0.373	0.332	0.1	0.899	0.7	0.6	OVERLOAD	0	0	0	0	0	0	0
	2018-09-28 09:25:32	129	20.96	20.61	0.35	0.1	115	0.041	0.362	0.321	0.1	0.892	0.6	0.6	OVERLOAD	0	0	0	0	0	0	0
	2018-09-28 09:27:32	129	20.96	20.61	0.35	0.1	115	0.041	0.363	0.322	0.1	0.894	0.6	0.6	OVERLOAD	0	0	0	0	0	0	0
	2018-09-28 09:29:32	127	20.96	20.61	0.35	0.1	114	0.041	0.361	0.319	0.1	0.903	0.6	0.6	OVERLOAD	0	0	0	0	0	0	0
	2018-09-28 09:31:32	127	20.96	20.61	0.35	0.1	115	0.041	0.362	0.32	0.1	0.904	0.6	0.6	OVERLOAD	0	0	0	0	0	0	0
	2018-09-28 09:33:32	125	20.96	20.62	0.34	0.1	114	0.041	0.359	0.318	0.1	0.911	0.6	0.6	OVERLOAD	0	0	0	0	0	0	0
	2018-09-28 09:35:32	128	20.96	20.61	0.35	0.1	117	0.041	0.367	0.326	0.1	0.914	0.6	0.6	OVERLOAD	0	0	0	0	0	0	0
	2018-09-28 09:37:32	128	20.96	20.61	0.35	0.1	119	0.041	0.373	0.331	0.1	0.93	0.6	0.6	OVERLOAD	0	0	0	0	0	0	0
	2018-09-28 09:39:32	127	20.96	20.61	0.35	0.1	119	0.041	0.375	0.333	0.1	0.942	0.6	0.6	OVERLOAD	0	0	0	0	0	0	0
	2018-09-28 09:41:32	125	20.96	20.61	0.35	0.1	118	0.041	0.372	0.331	0.1	0.945	0.6	0.6	OVERLOAD	0	0	0	0	0	0	0
	2018-09-28 09:43:32	125	20.96	20.62	0.34	0.1	118	0.041	0.37	0.329	0.1	0.942	0.6	0.6	OVERLOAD	0	0	0	0	0	0	0
	2018-09-28 09:45:32	126	20.96	20.61	0.35	0.2	120	0.041	0.376	0.335	0.1	0.954	0.6	0.6	OVERLOAD	0	0	0	0	0	0	0
	2018-09-28 09:47:32	124	20.96	20.62	0.34	0.2	119	0.041	0.374	0.333	0.1	0.961	0.6	0.6	OVERLOAD	0	0	0	0	0	0	0
	2018-09-28 09:49:32	124	20.96	20.62	0.34	0.2	119	0.041	0.373	0.332	0.1	0.96	0.6	0.6	OVERLOAD	0	0	0	0	0	0	0
	2018-09-28 09:51:32	126	20.96	20.61	0.35	0.2	122	0.041	0.383	0.341	0.2	0.973	0.6	0.6	OVERLOAD	0	0	0	0	0	0	0
	2018-09-28 09:53:32	124	20.96	20.62	0.34	0.2	121	0.041	0.379	0.338	0.2	0.977	0.6	0.6	OVERLOAD	0	0	0	0	0	0	0
	2018-09-28 09:55:32	117	20.96	20.63	0.33	0.2	115	0.041	0.363	0.322	0.2	0.981	0.6	0.6	OVERLOAD	0	0	0	0	0	0	0
	2018-09-28 09:57:32	117	20.96	20.63	0.32	0.2	115	0.041	0.363	0.321	0.2	0.986	0.6	0.6	OVERLOAD	0	0	0	0	0	0	0
	2018-09-28 09:59:32	118	20.96	20.63	0.33	0.2	116	0.041	0.365	0.324	0.2	0.982	0.6	0.6	OVERLOAD	0	0	0	0	0	0	0
	2018-09-28 10:01:32	115	20.96	20.64	0.32	0.2	113	0.041	0.358	0.317	0.2	0.986	0.6	0.6	OVERLOAD	0	0	0	0	0	0	0
	2018-09-28 10:03:32	113	20.96	20.65	0.31	0.2	111	0.041	0.35	0.309	0.2	0.981	0.6	0.6	OVERLOAD	0	0	0	0	0	0	0
	2018-09-28 10:05:32	112	20.96	20.65	0.31	0.2	111	0.041	0.352	0.311	0.2	0.995	0.6	0.6	OVERLOAD	0	0	0	0	0	0	0
	2018-09-28 10:07:32	112	20.96	20.65	0.31	0.2	111	0.041	0.352	0.311	0.2	0.994	0.6	0.6	OVERLOAD	0	0	0	0	0	0	0

## Sheet: 6-P1187
	Subject ID	6-P1187
	Weight(g)	23.96
	Sex	Male
	Genotype
	Diet	Chow
===============	===============	===============	===============	===============	===============	===============	===============	===============	===============	===============	===============	===============	===============	===============	===============	===============	===============	===============	===============	===============	===============	===============
	DATE/TIME	VO2	O2IN	O2OUT	DO2	ACCO2	VCO2	CO2IN	CO2OUT	DCO2	ACCCO2	RER	HEAT	FLOW	STATUS1	FEED1	FEED1 ACC	DRINK1	DRINK1 ACC	XTOT	XAMB	ZTOT
===============		ml/hr	%	%		l	ml/hr	%	%		l		kcal/hr	LPM		GRAMS	GRAMS	ml	ml	COUNTS	COUNTS	COUNTS
15 meter/min	2018-09-28 10:25:31	154	21.02	20.61	0.42	0	129	0.047	0.407	0.36	0	0.834	0.7	0.6	OVERLOAD	0	0	0	0	0	0	0
	2018-09-28 10:27:31	155	21.02	20.61	0.42	0	127	0.047	0.402	0.354	0	0.817	0.7	0.6	OVERLOAD	0	0	0	0	0	0	0
	2018-09-28 10:29:31	154	21.02	20.61	0.41	0	127	0.047	0.402	0.354	0	0.825	0.7	0.6	OVERLOAD	0	0	0	0	0	0	0
	2018-09-28 10:31:31	151	21.02	20.62	0.41	0	125	0.047	0.397	0.35	0	0.831	0.7	0.6	OVERLOAD	0	0	0	0	0	0	0
	2018-09-28 10:33:31	146	21.02	20.63	0.39	0	121	0.047	0.385	0.337	0	0.827	0.7	0.6	OVERLOAD	0	0	0	0	0	0	0
	2018-09-28 10:35:31	140	21.02	20.64	0.38	0	121	0.047	0.384	0.337	0	0.859	0.7	0.6	OVERLOAD	0	0	0	0	0	0	0
	2018-09-28 10:37:31	141	21.02	20.64	0.38	0	118	0.047	0.378	0.331	0	0.838	0.7	0.6	OVERLOAD	0	0	0	0	0	0	0
	2018-09-28 10:39:31	146	21.02	20.63	0.39	0	125	0.047	0.396	0.348	0	0.855	0.7	0.6	OVERLOAD	0	0	0	0	0	0	0
	2018-09-28 10:41:31	147	21.02	20.62	0.4	0	128	0.047	0.406	0.359	0	0.877	0.7	0.6	OVERLOAD	0	0	0	0	0	0	0
	2018-09-28 10:43:31	140	21.02	20.64	0.38	0	118	0.047	0.378	0.331	0	0.845	0.7	0.6	OVERLOAD	0	0	0	0	0	0	0
	2018-09-28 10:45:31	137	21.02	20.65	0.37	0	116	0.047	0.372	0.324	0	0.845	0.7	0.6	OVERLOAD	0	0	0	0	0	0	0
	2018-09-28 10:47:31	138	21.02	20.65	0.37	0.1	116	0.047	0.373	0.325	0	0.842	0.7	0.6	OVERLOAD	0	0	0	0	0	0	0
	2018-09-28 10:49:31	138	21.02	20.65	0.37	0.1	117	0.047	0.375	0.327	0	0.85	0.7	0.6	OVERLOAD	0	0	0	0	0	0	0
	2018-09-28 10:51:31	138	21.02	20.65	0.37	0.1	117	0.047	0.373	0.326	0.1	0.845	0.7	0.6	OVERLOAD	0	0	0	0	0	0	0
	2018-09-28 10:53:31	134	21.02	20.66	0.36	0.1	114	0.047	0.365	0.318	0.1	0.847	0.7	0.6	OVERLOAD	0	0	0	0	0	0	0
	2018-09-28 10:55:31	131	21.02	20.67	0.35	0.1	112	0.047	0.361	0.314	0.1	0.858	0.6	0.6	OVERLOAD	0	0	0	0	0	0	0
	2018-09-28 10:57:31	138	21.02	20.65	0.37	0.1	119	0.047	0.378	0.331	0.1	0.859	0.7	0.6	OVERLOAD	0	0	0	0	0	0	0
	2018-09-28 10:59:31	132	21.02	20.67	0.36	0.1	113	0.047	0.363	0.315	0.1	0.855	0.6	0.6	OVERLOAD	0	0	0	0	0	0	0
	2018-09-28 11:01:31	132	21.02	20.67	0.36	0.1	112	0.047	0.36	0.312	0.1	0.849	0.6	0.6	OVERLOAD	0	0	0	0	0	0	0
	2018-09-28 11:03:31	132	21.02	20.67	0.36	0.1	110	0.047	0.355	0.308	0.1	0.832	0.6	0.6	OVERLOAD	0	0	0	0	0	0	0
	2018-09-28 11:05:31	135	21.02	20.66	0.36	0.1	112	0.047	0.359	0.312	0.1	0.828	0.7	0.6	OVERLOAD	0	0	0	0	0	0	0
	2018-09-28 11:07:31	131	21.02	20.67	0.35	0.1	110	0.047	0.356	0.308	0.1	0.844	0.6	0.6	OVERLOAD	0	0	0	0	0	0	0
	2018-09-28 11:09:31	128	21.02	20.68	0.35	0.1	108	0.047	0.348	0.301	0.1	0.84	0.6	0.6	OVERLOAD	0	0	0	0	0	0	0
	2018-09-28 11:11:31	132	21.02	20.67	0.36	0.1	111	0.047	0.356	0.309	0.1	0.838	0.6	0.6	OVERLOAD	0	0	0	0	0	0	0
	2018-09-28 11:13:31	130	21.02	20.67	0.35	0.1	110	0.047	0.353	0.306	0.1	0.845	0.6	0.6	OVERLOAD	0	0	0	0	0	0	0
	2018-09-28 11:15:31	127	21.02	20.68	0.34	0.1	108	0.047	0.349	0.302	0.1	0.852	0.6	0.6	OVERLOAD	0	0	0	0	0	0	0
	2018-09-28 11:17:31	132	21.02	20.67	0.35	0.1	108	0.047	0.349	0.301	0.1	0.817	0.6	0.6	OVERLOAD	0	0	0	0	0	0	0
	2018-09-28 11:19:31	135	21.02	20.66	0.36	0.1	111	0.047	0.358	0.311	0.1	0.823	0.7	0.6	OVERLOAD	0	0	0	0	0	0	0
	2018-09-28 11:21:31	118	21.02	20.71	0.32	0.1	98	0.047	0.32	0.273	0.1	0.829	0.6	0.6	OVERLOAD	0	0	0	0	0	0	0
	2018-09-28 11:23:31	121	21.02	20.7	0.33	0.1	100	0.047	0.327	0.28	0.1	0.829	0.6	0.6	OVERLOAD	0	0	0	0	0	0	0
	2018-09-28 11:25:31	129	21.02	20.68	0.35	0.1	105	0.047	0.342	0.294	0.1	0.818	0.6	0.6	OVERLOAD	0	0	0	0	0	0	0
	2018-09-28 11:27:31	125	21.02	20.68	0.34	0.1	105	0.047	0.34	0.292	0.1	0.834	0.6	0.6	OVERLOAD	0	0	0	0	0	0	0
	2018-09-28 11:29:31	128	21.02	20.68	0.34	0.1	105	0.047	0.34	0.293	0.1	0.821	0.6	0.6	OVERLOAD	0	0	0	0	0	0	0
	2018-09-28 11:31:31	126	21.02	20.68	0.34	0.1	103	0.047	0.336	0.288	0.1	0.82	0.6	0.6	OVERLOAD	0	0	0.02	0.02	0	0	0
	2018-09-28 11:33:31	116	21.02	20.71	0.31	0.2	97	0.047	0.318	0.271	0.1	0.838	0.6	0.6	OVERLOAD	0	0	0	0.02	0	0	0
	2018-09-28 11:35:31	119	21.02	20.7	0.32	0.2	100	0.047	0.327	0.279	0.1	0.838	0.6	0.6	OVERLOAD	0	0	0	0.02	0	0	0
	2018-09-28 11:37:31	130	21.02	20.67	0.35	0.2	107	0.047	0.348	0.3	0.1	0.827	0.6	0.6	OVERLOAD	0	0	0	0.02	0	0	0
	2018-09-28 11:39:31	119	21.02	20.7	0.32	0.2	98	0.047	0.322	0.274	0.1	0.824	0.6	0.6	OVERLOAD	0	0	0	0.02	0	0	0
	2018-09-28 11:41:31	114	21.02	20.72	0.3	0.2	91	0.047	0.301	0.253	0.1	0.795	0.5	0.6	OVERLOAD	0	0	0	0.02	0	0	0
	2018-09-28 11:43:31	108	21.02	20.73	0.29	0.2	89	0.047	0.295	0.248	0.1	0.825	0.5	0.6	OVERLOAD	0	0	0	0.02	0	0	0
	2018-09-28 11:45:31	127	21.02	20.68	0.34	0.2	105	0.047	0.342	0.294	0.1	0.832	0.6	0.6	OVERLOAD	0	0	0	0.02	0	0	0
	2018-09-28 11:47:31	130	21.02	20.67	0.35	0.2	105	0.047	0.34	0.293	0.2	0.806	0.6	0.6	OVERLOAD	0	0	0	0.02	0	0	0
	2018-09-28 11:49:31	124	21.02	20.69	0.33	0.2	102	0.047	0.333	0.286	0.2	0.827	0.6	0.6	OVERLOAD	0	0	0	0.02	0	0	0
	2018-09-28 11:51:31	125	21.02	20.69	0.33	0.2	100	0.047	0.326	0.278	0.2	0.796	0.6	0.6	OVERLOAD	0	0	0	0.02	0	0	0
	2018-09-28 11:53:31	131	21.02	20.67	0.35	0.2	106	0.047	0.344	0.296	0.2	0.81	0.6	0.6	OVERLOAD	0	0	0	0.02	0	0	0
	2018-09-28 11:55:31	124	21.02	20.69	0.33	0.2	103	0.047	0.336	0.288	0.2	0.835	0.6	0.6	OVERLOAD	0	0	0	0.02	0	0	0
	2018-09-28 11:57:31	125	21.02	20.69	0.34	0.2	103	0.047	0.336	0.289	0.2	0.829	0.6	0.6	OVERLOAD	0	0	0	0.02	0	0	0

## Sheet: 7-P1188
	Subject ID	7-P1188
	Weight(g)	25.01
	Sex	Male
	Genotype
	Diet	Chow
===============	===============	===============	===============	===============	===============	===============	===============	===============	===============	===============	===============	===============	===============	===============	===============	===============	===============	===============	===============	===============	===============	===============
	DATE/TIME	VO2	O2IN	O2OUT	DO2	ACCO2	VCO2	CO2IN	CO2OUT	DCO2	ACCCO2	RER	HEAT	FLOW	STATUS1	FEED1	FEED1 ACC	DRINK1	DRINK1 ACC	XTOT	XAMB	ZTOT
===============		ml/hr	%	%		l	ml/hr	%	%		l		kcal/hr	LPM		GRAMS	GRAMS	ml	ml	COUNTS	COUNTS	COUNTS
15 meter/min	2018-09-28 12:10:04	142	21.04	20.66	0.39	0	122	0.046	0.386	0.34	0	0.855	0.7	0.6	OVERLOAD	0	0	0	0	0	0	0
	2018-09-28 12:12:04	156	21.04	20.62	0.42	0	126	0.046	0.397	0.351	0	0.806	0.7	0.6	OVERLOAD	0	0	0	0	0	0	0
	2018-09-28 12:14:04	154	21.04	20.63	0.41	0	123	0.046	0.39	0.343	0	0.797	0.7	0.6	OVERLOAD	0	0	0	0	0	0	0
	2018-09-28 12:16:04	149	21.04	20.64	0.4	0	118	0.046	0.375	0.329	0	0.792	0.7	0.6	OVERLOAD	0	0	0	0	0	0	0
	2018-09-28 12:18:04	144	21.04	20.66	0.39	0	116	0.046	0.371	0.325	0	0.807	0.7	0.6	OVERLOAD	0	0	0	0	0	0	0
	2018-09-28 12:20:04	143	21.04	20.66	0.38	0	115	0.046	0.368	0.321	0	0.805	0.7	0.6	OVERLOAD	0	0	0.02	0.02	0	0	0
	2018-09-28 12:22:04	140	21.04	20.67	0.38	0	112	0.046	0.36	0.314	0	0.802	0.7	0.6	OVERLOAD	0	0	0	0.02	0	0	0
	2018-09-28 12:24:04	137	21.04	20.67	0.37	0	111	0.046	0.356	0.31	0	0.808	0.7	0.6	OVERLOAD	0	0	0	0.02	0	0	0
	2018-09-28 12:26:04	136	21.04	20.68	0.36	0	109	0.046	0.352	0.305	0	0.803	0.7	0.6	OVERLOAD	0	0	0	0.02	0	0	0
	2018-09-28 12:28:04	136	21.04	20.68	0.36	0	109	0.046	0.352	0.306	0	0.807	0.7	0.6	OVERLOAD	0	0	0	0.02	0	0	0
	2018-09-28 12:30:04	140	21.04	20.66	0.38	0	119	0.046	0.378	0.331	0	0.845	0.7	0.6	OVERLOAD	0	0	0	0.02	0	0	0
	2018-09-28 12:32:04	143	21.04	20.66	0.38	0.1	118	0.046	0.376	0.33	0	0.825	0.7	0.6	OVERLOAD	0	0	0	0.02	0	0	0
	2018-09-28 12:34:04	145	21.04	20.65	0.39	0.1	118	0.046	0.377	0.331	0	0.818	0.7	0.6	OVERLOAD	0	0	0	0.02	0	0	0
	2018-09-28 12:36:04	146	21.04	20.65	0.39	0.1	116	0.046	0.371	0.325	0.1	0.797	0.7	0.6	OVERLOAD	0	0	0	0.02	0	0	0
	2018-09-28 12:38:04	143	21.04	20.66	0.38	0.1	113	0.046	0.362	0.316	0.1	0.793	0.7	0.6	OVERLOAD	0	0	0	0.02	0	0	0
	2018-09-28 12:40:04	147	21.04	20.65	0.39	0.1	120	0.046	0.381	0.334	0.1	0.814	0.7	0.6	OVERLOAD	0	0	0	0.02	0	0	0
	2018-09-28 12:42:04	143	21.04	20.66	0.38	0.1	114	0.046	0.366	0.319	0.1	0.802	0.7	0.6	OVERLOAD	0	0	0	0.02	0	0	0
	2018-09-28 12:44:04	144	21.04	20.66	0.38	0.1	115	0.046	0.367	0.32	0.1	0.799	0.7	0.6	OVERLOAD	0	0	0	0.02	0	0	0
	2018-09-28 12:46:04	143	21.04	20.66	0.38	0.1	113	0.046	0.363	0.317	0.1	0.794	0.7	0.6	OVERLOAD	0	0	0	0.02	0	0	0
	2018-09-28 12:48:04	143	21.04	20.66	0.38	0.1	113	0.046	0.361	0.315	0.1	0.79	0.7	0.6	OVERLOAD	0	0	0	0.02	0	0	0
	2018-09-28 12:50:04	140	21.04	20.67	0.37	0.1	109	0.046	0.351	0.305	0.1	0.781	0.7	0.6	OVERLOAD	0	0	0	0.02	0	0	0
	2018-09-28 12:52:04	143	21.04	20.66	0.38	0.1	113	0.046	0.362	0.316	0.1	0.789	0.7	0.6	OVERLOAD	0	0	0	0.02	0	0	0
	2018-09-28 12:54:04	146	21.04	20.65	0.39	0.1	114	0.046	0.365	0.319	0.1	0.779	0.7	0.6	OVERLOAD	0	0	0	0.02	0	0	0
	2018-09-28 12:56:04	145	21.04	20.65	0.39	0.1	115	0.046	0.368	0.321	0.1	0.793	0.7	0.6	OVERLOAD	0	0	0	0.02	0	0	0
	2018-09-28 12:58:04	148	21.04	20.65	0.39	0.1	117	0.046	0.373	0.327	0.1	0.791	0.7	0.6	OVERLOAD	0	0	0	0.02	0	0	0
	2018-09-28 13:00:04	149	21.04	20.64	0.4	0.1	118	0.046	0.377	0.331	0.1	0.795	0.7	0.6	OVERLOAD	0	0	0	0.02	0	0	0
	2018-09-28 13:02:04	148	21.04	20.65	0.39	0.1	117	0.046	0.373	0.327	0.1	0.793	0.7	0.6	OVERLOAD	0	0	0	0.02	0	0	0
	2018-09-28 13:04:04	146	21.04	20.65	0.39	0.1	116	0.046	0.371	0.325	0.1	0.796	0.7	0.6	OVERLOAD	0	0	0	0.02	0	0	0
	2018-09-28 13:06:04	147	21.04	20.65	0.39	0.1	117	0.046	0.375	0.328	0.1	0.8	0.7	0.6	OVERLOAD	0	0	0	0.02	0	0	0
	2018-09-28 13:08:04	149	21.04	20.64	0.4	0.1	119	0.046	0.38	0.333	0.1	0.801	0.7	0.6	OVERLOAD	0	0	0	0.02	0	0	0
	2018-09-28 13:10:04	147	21.04	20.65	0.39	0.1	117	0.046	0.374	0.327	0.1	0.799	0.7	0.6	OVERLOAD	0	0	0	0.02	0	0	0
	2018-09-28 13:12:04	145	21.04	20.65	0.39	0.1	116	0.046	0.371	0.325	0.1	0.803	0.7	0.6	OVERLOAD	0	0	0	0.02	0	0	0
	2018-09-28 13:14:04	145	21.04	20.65	0.39	0.2	116	0.046	0.371	0.324	0.1	0.799	0.7	0.6	OVERLOAD	0	0	0	0.02	0	0	0
	2018-09-28 13:16:04	144	21.04	20.66	0.39	0.2	115	0.046	0.368	0.321	0.1	0.797	0.7	0.6	OVERLOAD	0	0	0	0.02	0	0	0
	2018-09-28 13:18:04	145	21.04	20.65	0.39	0.2	117	0.046	0.373	0.326	0.1	0.805	0.7	0.6	OVERLOAD	0	0	0	0.02	0	0	0
	2018-09-28 13:20:04	146	21.04	20.65	0.39	0.2	117	0.046	0.373	0.326	0.1	0.798	0.7	0.6	OVERLOAD	0	0	0	0.02	0	0	0
	2018-09-28 13:22:04	148	21.04	20.65	0.4	0.2	119	0.046	0.379	0.332	0.1	0.803	0.7	0.6	OVERLOAD	0	0	0	0.02	0	0	0
	2018-09-28 13:24:04	148	21.04	20.65	0.4	0.2	119	0.046	0.378	0.331	0.1	0.803	0.7	0.6	OVERLOAD	0	0	0	0.02	0	0	0
	2018-09-28 13:26:04	146	21.04	20.65	0.39	0.2	116	0.046	0.371	0.324	0.1	0.795	0.7	0.6	OVERLOAD	0	0	0	0.02	0	0	0
	2018-09-28 13:28:04	146	21.04	20.65	0.39	0.2	117	0.046	0.372	0.326	0.2	0.8	0.7	0.6	OVERLOAD	0	0	0	0.02	0	0	0
	2018-09-28 13:30:04	145	21.04	20.65	0.39	0.2	116	0.046	0.369	0.323	0.2	0.798	0.7	0.6	OVERLOAD	0	0	0	0.02	0	0	0
	2018-09-28 13:32:04	145	21.04	20.65	0.39	0.2	116	0.046	0.372	0.325	0.2	0.803	0.7	0.6	OVERLOAD	0	0	0	0.02	0	0	0
	2018-09-28 13:34:04	145	21.04	20.65	0.39	0.2	116	0.046	0.369	0.323	0.2	0.799	0.7	0.6	OVERLOAD	0	0	0	0.02	0	0	0
	2018-09-28 13:36:04	145	21.04	20.65	0.39	0.2	116	0.046	0.37	0.323	0.2	0.801	0.7	0.6	OVERLOAD	0	0	0	0.02	0	0	0
	2018-09-28 13:38:04	146	21.04	20.65	0.39	0.2	116	0.046	0.372	0.325	0.2	0.796	0.7	0.6	OVERLOAD	0	0	0	0.02	0	0	0

## Sheet: 1- S1190
	Subject ID	1- S1190
	Weight(g)	31.93
	Sex	Male
	Genotype
	Diet	Chow
===============	===============	===============	===============	===============	===============	===============	===============	===============	===============	===============	===============	===============	===============	===============	===============	===============	===============	===============	===============	===============	===============	===============
	DATE/TIME	VO2	O2IN	O2OUT	DO2	ACCO2	VCO2	CO2IN	CO2OUT	DCO2	ACCCO2	RER	HEAT	FLOW	STATUS1	FEED1	FEED1 ACC	DRINK1	DRINK1 ACC	XTOT	XAMB	ZTOT
===============		ml/hr	%	%		l	ml/hr	%	%		l		kcal/hr	LPM		GRAMS	GRAMS	ml	ml	COUNTS	COUNTS	COUNTS
15 meter/min	2018-09-27 09:16:23	192	20.97	20.46	0.51	0	146	0.043	0.451	0.408	0	0.759	0.9	0.6	OVERLOAD	0	0	0	0	0	0	0
	2018-09-27 09:18:23	211	20.97	20.41	0.56	0	159	0.043	0.486	0.443	0	0.752	1	0.6	OVERLOAD	0	0	0	0	0	0	0
	2018-09-27 09:20:23	207	20.97	20.42	0.55	0	157	0.043	0.481	0.438	0	0.758	1	0.6	OVERLOAD	0	0	0	0	0	0	0
	2018-09-27 09:22:23	203	20.97	20.43	0.54	0	155	0.043	0.476	0.433	0	0.76	1	0.6	OVERLOAD	0	0	0	0	0	0	0
	2018-09-27 09:24:23	198	20.97	20.44	0.53	0	152	0.043	0.468	0.425	0	0.768	0.9	0.6	OVERLOAD	0	0	0	0	0	0	0
	2018-09-27 09:26:23	201	20.97	20.43	0.53	0	154	0.043	0.473	0.43	0	0.765	1	0.6	OVERLOAD	0	0	0	0	0	0	0
	2018-09-27 09:28:23	199	20.97	20.44	0.53	0	151	0.043	0.465	0.422	0	0.759	0.9	0.6	OVERLOAD	0	0	0	0	0	0	0
	2018-09-27 09:30:23	193	20.97	20.46	0.51	0.1	145	0.043	0.449	0.406	0	0.753	0.9	0.6	OVERLOAD	0	0	0	0	0	0	0
	2018-09-27 09:32:23	197	20.97	20.45	0.52	0.1	150	0.043	0.462	0.419	0	0.762	0.9	0.6	OVERLOAD	0	0	0	0	0	0	0
	2018-09-27 09:34:23	201	20.97	20.44	0.53	0.1	152	0.043	0.467	0.424	0	0.754	1	0.6	OVERLOAD	0	0	0	0	0	0	0
	2018-09-27 09:36:23	196	20.97	20.45	0.52	0.1	147	0.043	0.453	0.41	0.1	0.749	0.9	0.6	OVERLOAD	0	0	0	0	0	0	0
	2018-09-27 09:38:23	200	20.97	20.44	0.53	0.1	151	0.043	0.466	0.423	0.1	0.758	0.9	0.6	OVERLOAD	0	0	0	0	0	0	0
	2018-09-27 09:40:23	196	20.97	20.45	0.52	0.1	148	0.043	0.458	0.415	0.1	0.756	0.9	0.6	OVERLOAD	0	0	0	0	0	0	0
	2018-09-27 09:42:23	196	20.97	20.45	0.52	0.1	148	0.043	0.457	0.414	0.1	0.757	0.9	0.6	OVERLOAD	0	0	0	0	0	0	0
	2018-09-27 09:44:23	196	20.97	20.45	0.52	0.1	149	0.043	0.461	0.418	0.1	0.761	0.9	0.6	OVERLOAD	0	0	0	0	0	0	0
	2018-09-27 09:46:23	192	20.97	20.46	0.51	0.1	146	0.043	0.451	0.408	0.1	0.758	0.9	0.6	OVERLOAD	0	0	0	0	0	0	0
	2018-09-27 09:48:23	190	20.97	20.46	0.51	0.1	147	0.043	0.455	0.412	0.1	0.777	0.9	0.6	OVERLOAD	0	0	0	0	0	0	0
	2018-09-27 09:50:23	191	20.97	20.46	0.51	0.1	146	0.043	0.451	0.408	0.1	0.765	0.9	0.6	OVERLOAD	0	0	0	0	0	0	0
	2018-09-27 09:52:23	197	20.97	20.45	0.52	0.1	148	0.043	0.457	0.414	0.1	0.751	0.9	0.6	OVERLOAD	0	0	0	0	0	0	0
	2018-09-27 09:54:23	190	20.97	20.46	0.51	0.1	146	0.043	0.45	0.407	0.1	0.764	0.9	0.6	OVERLOAD	0	0	0	0	0	0	0
	2018-09-27 09:56:23	187	20.97	20.47	0.5	0.1	143	0.043	0.443	0.4	0.1	0.766	0.9	0.6	OVERLOAD	0	0	0	0	0	0	0
	2018-09-27 09:58:23	178	20.97	20.49	0.48	0.1	142	0.043	0.44	0.397	0.1	0.796	0.9	0.6	OVERLOAD	0	0	0	0	0	0	0
	2018-09-27 10:00:23	182	20.97	20.48	0.48	0.1	142	0.043	0.439	0.395	0.1	0.778	0.9	0.6	OVERLOAD	0	0	0	0	0	0	0
	2018-09-27 10:02:23	191	20.97	20.46	0.51	0.2	150	0.043	0.461	0.418	0.1	0.784	0.9	0.6	OVERLOAD	0	0	0	0	0	0	0
	2018-09-27 10:04:23	191	20.97	20.46	0.51	0.2	148	0.043	0.457	0.414	0.1	0.774	0.9	0.6	OVERLOAD	0	0	0	0	0	0	0
	2018-09-27 10:06:23	184	20.97	20.48	0.49	0.2	143	0.043	0.442	0.399	0.1	0.777	0.9	0.6	OVERLOAD	0	0	0	0	0	0	0
	2018-09-27 10:08:23	171	20.97	20.51	0.46	0.2	133	0.043	0.414	0.37	0.1	0.775	0.8	0.6	OVERLOAD	0	0	0	0	0	0	0
	2018-09-27 10:10:23	176	20.97	20.5	0.47	0.2	139	0.043	0.433	0.39	0.1	0.79	0.8	0.6	OVERLOAD	0	0	0	0	0	0	0
	2018-09-27 10:12:23	178	20.97	20.49	0.48	0.2	141	0.043	0.438	0.395	0.1	0.794	0.9	0.6	OVERLOAD	0	0	0	0	0	0	0
	2018-09-27 10:14:23	169	20.97	20.52	0.45	0.2	133	0.043	0.416	0.373	0.1	0.788	0.8	0.6	OVERLOAD	0	0	0	0	0	0	0
	2018-09-27 10:16:23	161	20.97	20.54	0.43	0.2	128	0.043	0.402	0.359	0.2	0.795	0.8	0.6	OVERLOAD	0	0	0	0	0	0	0
	2018-09-27 10:18:23	155	20.97	20.55	0.42	0.2	126	0.043	0.395	0.352	0.2	0.811	0.7	0.6	OVERLOAD	0	0	0	0	0	0	0
	2018-09-27 10:20:23	157	20.97	20.55	0.42	0.2	126	0.043	0.396	0.353	0.2	0.803	0.8	0.6	OVERLOAD	0	0	0	0	0	0	0
	2018-09-27 10:22:23	163	20.97	20.53	0.44	0.2	133	0.043	0.413	0.37	0.2	0.811	0.8	0.6	OVERLOAD	0	0	0	0	0	0	0
	2018-09-27 10:24:23	174	20.97	20.5	0.46	0.2	138	0.043	0.428	0.385	0.2	0.793	0.8	0.6	OVERLOAD	0	0	0	0	0	0	0
	2018-09-27 10:26:23	174	20.97	20.5	0.46	0.2	139	0.043	0.432	0.389	0.2	0.801	0.8	0.6	OVERLOAD	0	0	0	0	0	0	0
	2018-09-27 10:28:23	166	20.97	20.52	0.44	0.2	132	0.043	0.412	0.369	0.2	0.797	0.8	0.6	OVERLOAD	0	0	0	0	0	0	0
	2018-09-27 10:30:23	152	20.97	20.56	0.41	0.2	123	0.043	0.387	0.344	0.2	0.81	0.7	0.6	OVERLOAD	0	0	0.02	0.02	0	0	0
	2018-09-27 10:32:23	149	20.97	20.57	0.4	0.2	124	0.043	0.389	0.345	0.2	0.828	0.7	0.6	OVERLOAD	0	0	0	0.02	0	0	0
	2018-09-27 10:34:23	151	20.97	20.56	0.4	0.2	121	0.043	0.382	0.339	0.2	0.802	0.7	0.6	OVERLOAD	0	0	0	0.02	0	0	0
	2018-09-27 10:36:23	154	20.97	20.55	0.42	0.2	131	0.043	0.409	0.366	0.2	0.85	0.7	0.6	OVERLOAD	0	0	0	0.02	0	0	0
	2018-09-27 10:38:23	144	20.97	20.58	0.39	0.3	121	0.043	0.381	0.338	0.2	0.839	0.7	0.6	OVERLOAD	0	0	0	0.02	0	0	0
	2018-09-27 10:40:23	149	20.97	20.57	0.4	0.3	122	0.043	0.384	0.341	0.2	0.822	0.7	0.6	OVERLOAD	0	0	0	0.02	0	0	0
	2018-09-27 10:42:23	147	20.97	20.57	0.39	0.3	121	0.043	0.381	0.338	0.2	0.823	0.7	0.6	OVERLOAD	0	0	0	0.02	0	0	0
	2018-09-27 10:44:23	145	20.97	20.58	0.39	0.3	119	0.043	0.377	0.334	0.2	0.825	0.7	0.6	OVERLOAD	0	0	0	0.02	0	0	0

[truncated: 7 more sheets: 2- S1191, 3- S1192, 4- S1193, 5- S1194, 6- S1195, 7- S1196, 8- S1199]
