# Supplementary material for: Increased mTOR activity and metabolic efficiency in mouse and human cells containing the African-centric tumor-predisposing p53 variant Pro47Ser
Source: eLife. 2020 Nov 10;9:e55994. doi: 10.7554/eLife.55994 (PMC7661039; doi:10.7554/eLife.55994)
Supplement: Figure 6—source data 3. [file elife-55994-fig6-data3.xlsx]

## Sheet: s718
Subject ID	s718
Weight(g)	22.84	0.02284
Sex	Male
Diet	normal chow diet
Chamber Temperature: 220C
DATE/TIME	VO2		VCO2		RER	HEAT		FEED1		XTOT	XAMB
	ml/hr	ml/kg/hr	ml/hr	ml/kg/hr		kcal/hr	kcal/kg/hr	GRAMS	g/kg	COUNTS	COUNTS
2015-11-11 07:00:02	67	2933.45	63	2758.32	0.946	0.3	13.1349	0	0	22	4
2015-11-11 07:18:02	75	3283.71	72	3152.36	0.962	0.4	17.5131	0	0	28	2
2015-11-11 07:34:02	85	3721.54	82	3590.19	0.97	0.4	17.5131	0.17	7.44308	706	149
2015-11-11 07:52:02	79	3458.84	76	3327.5	0.958	0.4	17.5131	0.27	11.8214	936	349
2015-11-11 08:10:02	101	4422.07	98	4290.72	0.968	0.5	21.8914	0.13	5.69177	1660	1012
2015-11-11 08:28:02	102	4465.85	101	4422.07	0.986	0.5	21.8914	0.14	6.1296	1051	486
2015-11-11 08:46:02	71	3108.58	69	3021.02	0.974	0.4	17.5131	0.13	5.69177	347	140
2015-11-11 09:02:02	70	3064.8	66	2889.67	0.944	0.3	13.1349	0	0	10	1
2015-11-11 09:20:02	75	3283.71	73	3196.15	0.965	0.4	17.5131	0.09	3.94046	266	38
2015-11-11 09:38:02	71	3108.58	69	3021.02	0.971	0.4	17.5131	0	0	28	3
2015-11-11 09:56:02	68	2977.23	64	2802.1	0.942	0.3	13.1349	0	0	4	0
2015-11-11 10:14:02	68	2977.23	64	2802.1	0.938	0.3	13.1349	0.02	0.875657	89	25
2015-11-11 10:30:02	92	4028.02	88	3852.89	0.957	0.5	21.8914	0.01	0.437828	179	45
2015-11-11 10:48:02	99	4334.5	95	4159.37	0.961	0.5	21.8914	0.22	9.63222	942	419
2015-11-11 11:06:02	92	4028.02	88	3852.89	0.963	0.5	21.8914	0.22	9.63222	1225	529
2015-11-11 11:24:02	92	4028.02	91	3984.24	0.989	0.5	21.8914	0.16	7.00525	1252	634
2015-11-11 11:42:02	96	4203.15	94	4115.59	0.981	0.5	21.8914	0.02	0.875657	1451	809
2015-11-11 11:58:02	94	4115.59	90	3940.46	0.962	0.5	21.8914	0.13	5.69177	1228	588
2015-11-11 12:16:02	89	3896.67	84	3677.76	0.95	0.4	17.5131	0.11	4.81611	579	215
2015-11-11 12:34:02	72	3152.36	68	2977.23	0.939	0.4	17.5131	0.02	0.875657	9	0
2015-11-11 12:52:02	72	3152.36	66	2889.67	0.92	0.4	17.5131	0.01	0.437828	32	4
2015-11-11 13:10:02	72	3152.36	63	2758.32	0.873	0.4	17.5131	0	0	28	0
2015-11-11 13:26:02	75	3283.71	60	2626.97	0.802	0.4	17.5131	0.01	0.437828	22	2
2015-11-11 13:44:02	81	3546.41	67	2933.45	0.827	0.4	17.5131	0.01	0.437828	143	10
2015-11-11 14:02:02	87	3809.11	85	3721.54	0.974	0.4	17.5131	0.3	13.1349	767	326
2015-11-11 14:20:02	82	3590.19	77	3371.28	0.936	0.4	17.5131	0.08	3.50263	1095	486
2015-11-11 14:38:02	70	3064.8	66	2889.67	0.945	0.4	17.5131	0.08	3.50263	593	246
2015-11-11 14:54:02	77	3371.28	68	2977.23	0.88	0.4	17.5131	0.01	0.437828	19	5
2015-11-11 15:12:02	68	2977.23	56	2451.84	0.834	0.3	13.1349	0	0	25	1
2015-11-11 15:30:02	73	3196.15	61	2670.75	0.836	0.4	17.5131	0.01	0.437828	11	1
2015-11-11 15:48:02	72	3152.36	60	2626.97	0.829	0.3	13.1349	0	0	234	76
2015-11-11 16:06:02	70	3064.8	58	2539.4	0.821	0.3	13.1349	0.01	0.437828	41	4
2015-11-11 16:22:02	77	3371.28	68	2977.23	0.881	0.4	17.5131	0.19	8.31874	853	300
2015-11-11 16:40:02	91	3984.24	87	3809.11	0.951	0.5	21.8914	0.19	8.31874	1596	898
2015-11-11 16:58:02	84	3677.76	80	3502.63	0.948	0.4	17.5131	0.09	3.94046	804	396
2015-11-11 17:16:02	73	3196.15	64	2802.1	0.883	0.4	17.5131	0.01	0.437828	46	1
2015-11-11 17:34:02	75	3283.71	63	2758.32	0.842	0.4	17.5131	0	0	19	1
2015-11-11 17:50:02	78	3415.06	63	2758.32	0.813	0.4	17.5131	0.01	0.437828	30	2
2015-11-11 18:08:02	88	3852.89	74	3239.93	0.848	0.4	17.5131	0.01	0.437828	202	32
2015-11-11 18:26:02	90	3940.46	84	3677.76	0.926	0.4	17.5131	0.2	8.75657	1417	806
2015-11-11 18:44:02	70	3064.8	68	2977.23	0.968	0.4	17.5131	0.16	7.00525	1181	613
2015-11-11 19:02:02	105	4597.2	100	4378.28	0.952	0.5	21.8914	0.18	7.88091	1676	923
2015-11-11 19:18:02	103	4509.63	91	3984.24	0.878	0.5	21.8914	0.1	4.37828	1114	539
2015-11-11 19:36:02	86	3765.32	69	3021.02	0.807	0.4	17.5131	0	0	298	10
2015-11-11 19:54:02	83	3633.98	66	2889.67	0.803	0.4	17.5131	0	0	27	3
2015-11-11 20:12:02	82	3590.19	68	2977.23	0.821	0.4	17.5131	0	0	48	5
2015-11-11 20:30:02	81	3546.41	68	2977.23	0.843	0.4	17.5131	0.01	0.437828	35	4
2015-11-11 20:46:02	95	4159.37	82	3590.19	0.861	0.5	21.8914	0.14	6.1296	555	143
2015-11-11 21:04:02	98	4290.72	93	4071.8	0.946	0.5	21.8914	0.24	10.5079	1551	893
2015-11-11 21:22:02	99	4334.5	94	4115.59	0.95	0.5	21.8914	0.21	9.1944	923	242
2015-11-11 21:40:02	81	3546.41	70	3064.8	0.859	0.4	17.5131	0	0	133	23
2015-11-11 21:58:02	85	3721.54	70	3064.8	0.829	0.4	17.5131	0	0	27	9
2015-11-11 22:14:02	82	3590.19	68	2977.23	0.831	0.4	17.5131	0	0	411	39
2015-11-11 22:32:02	81	3546.41	63	2758.32	0.777	0.4	17.5131	0.01	0.437828	22	0
2015-11-11 22:50:02	84	3677.76	67	2933.45	0.796	0.4	17.5131	0	0	43	8
2015-11-11 23:08:02	93	4071.8	79	3458.84	0.848	0.5	21.8914	0.09	3.94046	293	116
2015-11-11 23:26:02	93	4071.8	91	3984.24	0.975	0.5	21.8914	0.15	6.56743	1130	450
2015-11-11 23:42:02	88	3852.89	69	3021.02	0.787	0.4	17.5131	0	0	290	38
2015-11-12 00:00:02	89	3896.67	70	3064.8	0.785	0.4	17.5131	0.01	0.437828	123	16
2015-11-12 00:18:02	86	3765.32	67	2933.45	0.778	0.4	17.5131	0	0	101	31
2015-11-12 00:36:02	80	3502.63	63	2758.32	0.787	0.4	17.5131	0.01	0.437828	25	4
2015-11-12 00:54:02	79	3458.84	66	2889.67	0.835	0.4	17.5131	0	0	43	2
2015-11-12 01:10:02	83	3633.98	67	2933.45	0.807	0.4	17.5131	0.01	0.437828	41	8
2015-11-12 01:28:02	93	4071.8	75	3283.71	0.802	0.4	17.5131	0.07	3.0648	160	34
2015-11-12 01:46:02	103	4509.63	96	4203.15	0.932	0.5	21.8914	0.33	14.4483	1206	633
2015-11-12 02:04:02	93	4071.8	85	3721.54	0.914	0.5	21.8914	0.08	3.50263	767	179
2015-11-12 02:22:02	81	3546.41	68	2977.23	0.835	0.4	17.5131	0	0	28	5
2015-11-12 02:38:02	81	3546.41	63	2758.32	0.785	0.4	17.5131	0.01	0.437828	25	8
2015-11-12 02:56:02	84	3677.76	64	2802.1	0.764	0.4	17.5131	0	0	18	3
2015-11-12 03:14:02	88	3852.89	68	2977.23	0.773	0.4	17.5131	0.01	0.437828	29	2
2015-11-12 03:32:02	67	2933.45	55	2408.06	0.819	0.3	13.1349	0.01	0.437828	33	4
2015-11-12 03:50:02	86	3765.32	76	3327.5	0.887	0.4	17.5131	0.23	10.0701	506	118
2015-11-12 04:06:02	105	4597.2	97	4246.94	0.93	0.5	21.8914	0.09	3.94046	1200	471
2015-11-12 04:24:02	73	3196.15	62	2714.54	0.852	0.4	17.5131	0	0	340	13
2015-11-12 04:42:02	76	3327.5	60	2626.97	0.788	0.4	17.5131	0.01	0.437828	6	1
2015-11-12 05:00:02	82	3590.19	66	2889.67	0.812	0.4	17.5131	0.01	0.437828	56	8
2015-11-12 05:18:02	89	3896.67	84	3677.76	0.945	0.4	17.5131	0.24	10.5079	728	173
2015-11-12 05:34:02	91	3984.24	82	3590.19	0.905	0.4	17.5131	0.07	3.0648	1023	439
2015-11-12 05:52:02	75	3283.71	64	2802.1	0.851	0.4	17.5131	0	0	39	7
2015-11-12 06:10:02	92	4028.02	87	3809.11	0.948	0.5	21.8914	0.19	8.31874	1256	659
2015-11-12 06:28:02	77	3371.28	72	3152.36	0.928	0.4	17.5131	0.14	6.1296	1028	386
2015-11-12 06:46:02	69	3021.02	66	2889.67	0.955	0.3	13.1349	0.08	3.50263	173	40
2015-11-12 07:02:02	77	3371.28	71	3108.58	0.918	0.4	17.5131	0.02	0.875657	18	5
2015-11-12 07:20:02	79	3458.84	70	3064.8	0.894	0.4	17.5131	0	0	60	16
2015-11-12 07:38:02	80	3502.63	77	3371.28	0.959	0.4	17.5131	0.34	14.8862	886	371
2015-11-12 07:56:02	72	3152.36	73	3196.15	1.004	0.4	17.5131	0.24	10.5079	670	222
2015-11-12 08:14:02	55	2408.06	53	2320.49	0.976	0.3	13.1349	0.22	9.63222	421	126
2015-11-12 08:30:02	85	3721.54	80	3502.63	0.94	0.4	17.5131	0.15	6.56743	1904	1344
2015-11-12 08:48:02	73	3196.15	70	3064.8	0.95	0.4	17.5131	0.19	8.31874	821	363
2015-11-12 09:06:02	84	3677.76	81	3546.41	0.962	0.4	17.5131	0.12	5.25394	1102	560
2015-11-12 09:24:02	72	3152.36	69	3021.02	0.96	0.4	17.5131	0	0	114	16
2015-11-12 09:42:02	92	4028.02	95	4159.37	1.032	0.5	21.8914	0.08	3.50263	386	119
2015-11-12 09:58:02	101	4422.07	100	4378.28	0.992	0.5	21.8914	0.13	5.69177	1216	723
2015-11-12 10:16:02	102	4465.85	101	4422.07	0.991	0.5	21.8914	0	0	1862	1066
2015-11-12 10:34:02	69	3021.02	67	2933.45	0.966	0.3	13.1349	0.14	6.1296	1045	530
2015-11-12 10:52:02	85	3721.54	83	3633.98	0.98	0.4	17.5131	0.15	6.56743	1776	1027
2015-11-12 11:10:02	92	4028.02	92	4028.02	0.998	0.5	21.8914	0.06	2.62697	609	117
2015-11-12 11:26:02	82	3590.19	75	3283.71	0.909	0.4	17.5131	0	0	37	6
2015-11-12 11:44:02	76	3327.5	75	3283.71	0.983	0.4	17.5131	0.01	0.437828	27	5
2015-11-12 12:02:02	83	3633.98	79	3458.84	0.947	0.4	17.5131	0	0	138	46
2015-11-12 12:20:02	92	4028.02	93	4071.8	1.003	0.5	21.8914	0.18	7.88091	854	181
2015-11-12 12:38:02	71	3108.58	68	2977.23	0.961	0.4	17.5131	0.02	0.875657	65	20
2015-11-12 12:54:02	76	3327.5	66	2889.67	0.868	0.4	17.5131	0	0	35	6
2015-11-12 13:12:02	74	3239.93	67	2933.45	0.895	0.4	17.5131	0	0	24	3
2015-11-12 13:30:02	95	4159.37	89	3896.67	0.94	0.5	21.8914	0	0	317	26
2015-11-12 13:48:02	86	3765.32	84	3677.76	0.983	0.4	17.5131	0.3	13.1349	847	455
2015-11-12 14:06:02	81	3546.41	80	3502.63	0.992	0.4	17.5131	0.1	4.37828	876	353
2015-11-12 14:22:02	97	4246.94	91	3984.24	0.94	0.5	21.8914	0.06	2.62697	927	377
2015-11-12 14:40:02	76	3327.5	68	2977.23	0.892	0.4	17.5131	0.01	0.437828	124	3
2015-11-12 14:58:02	78	3415.06	68	2977.23	0.869	0.4	17.5131	0	0	42	17
2015-11-12 15:16:02	83	3633.98	69	3021.02	0.831	0.4	17.5131	0	0	21	3
2015-11-12 15:34:02	78	3415.06	74	3239.93	0.951	0.4	17.5131	0.14	6.1296	873	244
2015-11-12 15:50:02	75	3283.71	71	3108.58	0.945	0.4	17.5131	0.21	9.1944	1097	574
2015-11-12 16:08:02	101	4422.07	97	4246.94	0.958	0.5	21.8914	0.16	7.00525	1743	1016
2015-11-12 16:26:02	68	2977.23	62	2714.54	0.903	0.3	13.1349	0.01	0.437828	295	63
2015-11-12 16:44:02	75	3283.71	66	2889.67	0.881	0.4	17.5131	0.01	0.437828	22	10
2015-11-12 17:02:02	73	3196.15	62	2714.54	0.848	0.4	17.5131	0	0	12	4
2015-11-12 17:18:02	72	3152.36	58	2539.4	0.808	0.3	13.1349	0.01	0.437828	20	1
2015-11-12 17:36:02	80	3502.63	65	2845.88	0.816	0.4	17.5131	0	0	3	1
2015-11-12 17:54:02	93	4071.8	89	3896.67	0.955	0.5	21.8914	0.21	9.1944	1212	504
2015-11-12 18:12:02	96	4203.15	95	4159.37	0.99	0.5	21.8914	0.15	6.56743	1124	509
2015-11-12 18:30:02	91	3984.24	87	3809.11	0.955	0.5	21.8914	0.1	4.37828	1161	491
2015-11-12 18:46:02	83	3633.98	73	3196.15	0.882	0.4	17.5131	0.01	0.437828	540	147
2015-11-12 19:04:02	81	3546.41	68	2977.23	0.845	0.4	17.5131	0	0	21	1
2015-11-12 19:22:02	98	4290.72	87	3809.11	0.895	0.5	21.8914	0.12	5.25394	550	166
2015-11-12 19:40:02	84	3677.76	81	3546.41	0.965	0.4	17.5131	0.06	2.62697	830	344
2015-11-12 19:58:02	79	3458.84	70	3064.8	0.895	0.4	17.5131	0	0	29	2
2015-11-12 20:14:02	115	5035.03	109	4772.33	0.943	0.6	26.2697	0.14	6.1296	1580	972
2015-11-12 20:32:02	96	4203.15	90	3940.46	0.937	0.5	21.8914	0.12	5.25394	1092	399
2015-11-12 20:50:02	95	4159.37	88	3852.89	0.926	0.5	21.8914	0.07	3.0648	1673	725
2015-11-12 21:08:02	97	4246.94	90	3940.46	0.926	0.5	21.8914	0.03	1.31349	1448	707
2015-11-12 21:26:02	94	4115.59	83	3633.98	0.883	0.5	21.8914	0.01	0.437828	1308	637
2015-11-12 21:42:02	89	3896.67	73	3196.15	0.825	0.4	17.5131	0	0	31	7
2015-11-12 22:00:02	84	3677.76	68	2977.23	0.817	0.4	17.5131	0.01	0.437828	42	1
2015-11-12 22:18:02	85	3721.54	77	3371.28	0.911	0.4	17.5131	0.16	7.00525	809	202
2015-11-12 22:36:02	73	3196.15	67	2933.45	0.918	0.4	17.5131	0.01	0.437828	55	22
2015-11-12 22:54:02	82	3590.19	72	3152.36	0.883	0.4	17.5131	0	0	48	12
2015-11-12 23:10:02	91	3984.24	82	3590.19	0.903	0.4	17.5131	0.11	4.81611	795	239
2015-11-12 23:28:02	100	4378.28	82	3590.19	0.821	0.5	21.8914	0.01	0.437828	192	9
2015-11-12 23:46:02	88	3852.89	71	3108.58	0.805	0.4	17.5131	0	0	61	1
2015-11-13 00:04:02	84	3677.76	70	3064.8	0.828	0.4	17.5131	0.01	0.437828	53	1
2015-11-13 00:22:02	88	3852.89	85	3721.54	0.969	0.4	17.5131	0.2	8.75657	751	282
2015-11-13 00:38:02	94	4115.59	76	3327.5	0.809	0.5	21.8914	0.01	0.437828	95	3
2015-11-13 00:56:02	83	3633.98	67	2933.45	0.808	0.4	17.5131	0	0	49	1
2015-11-13 01:14:02	89	3896.67	71	3108.58	0.799	0.4	17.5131	0.01	0.437828	108	8
2015-11-13 01:32:02	80	3502.63	65	2845.88	0.807	0.4	17.5131	0	0	178	20
2015-11-13 01:50:02	73	3196.15	61	2670.75	0.827	0.4	17.5131	0.01	0.437828	24	5
2015-11-13 02:06:02	82	3590.19	65	2845.88	0.795	0.4	17.5131	0.01	0.437828	25	8
2015-11-13 02:24:02	80	3502.63	63	2758.32	0.786	0.4	17.5131	0	0	36	13
2015-11-13 02:42:02	103	4509.63	90	3940.46	0.875	0.5	21.8914	0.16	7.00525	1078	448
2015-11-13 03:00:02	86	3765.32	80	3502.63	0.928	0.4	17.5131	0.28	12.2592	1362	659
2015-11-13 03:18:02	84	3677.76	79	3458.84	0.94	0.4	17.5131	0	0	754	133
2015-11-13 03:34:02	81	3546.41	66	2889.67	0.815	0.4	17.5131	0.01	0.437828	8	1
2015-11-13 03:52:02	78	3415.06	61	2670.75	0.781	0.4	17.5131	0.01	0.437828	43	5
2015-11-13 04:10:02	87	3809.11	69	3021.02	0.794	0.4	17.5131	0	0	25	2
2015-11-13 04:28:02	83	3633.98	68	2977.23	0.818	0.4	17.5131	0.01	0.437828	67	15
2015-11-13 04:46:02	70	3064.8	57	2495.62	0.814	0.3	13.1349	0.01	0.437828	20	1
2015-11-13 05:02:02	94	4115.59	79	3458.84	0.84	0.5	21.8914	0.1	4.37828	612	148
2015-11-13 05:20:02	97	4246.94	90	3940.46	0.924	0.5	21.8914	0.19	8.31874	1233	613
2015-11-13 05:38:02	87	3809.11	70	3064.8	0.806	0.4	17.5131	0.01	0.437828	180	12
2015-11-13 05:56:02	78	3415.06	64	2802.1	0.814	0.4	17.5131	0	0	54	2
2015-11-13 06:14:02	72	3152.36	58	2539.4	0.806	0.3	13.1349	0.01	0.437828	25	4
2015-11-13 06:30:02	78	3415.06	61	2670.75	0.781	0.4	17.5131	0.01	0.437828	14	1
2015-11-13 06:48:02	76	3327.5	59	2583.19	0.779	0.4	17.5131	0.01	0.437828	16	2
2015-11-13 07:06:02	88	3852.89	73	3196.15	0.83	0.4	17.5131	0.01	0.437828	127	17

## Sheet: s716
Subject ID	s716
Weight(g)	21.42	0.02142
Sex	Male
Diet	normal chow diet
Chamber Temperature: 220C
DATE/TIME	VO2		VCO2		RER	HEAT		FEED1		XTOT	XAMB
	ml/hr	ml/kg/hr	ml/hr	ml/kg/hr		kcal/hr	kcal/kg/hr	GRAMS	g/kg	COUNTS	COUNTS
2015-11-11 07:04:02	101	4715.22	98	4575.16	0.975	0.5	23.3427	0.18	8.40336	633	198
2015-11-11 07:22:02	83	3874.88	75	3501.4	0.898	0.4	18.6741	0	0	30	3
2015-11-11 07:40:02	85	3968.25	82	3828.2	0.964	0.4	18.6741	0.18	8.40336	412	101
2015-11-11 07:56:02	100	4668.53	99	4621.85	0.989	0.5	23.3427	0.23	10.7376	890	417
2015-11-11 08:14:02	95	4435.11	92	4295.05	0.975	0.5	23.3427	0.24	11.2045	878	380
2015-11-11 08:32:02	79	3688.14	76	3548.09	0.959	0.4	18.6741	0.06	2.80112	334	54
2015-11-11 08:50:02	91	4248.37	85	3968.25	0.938	0.5	23.3427	0	0	178	3
2015-11-11 09:08:02	86	4014.94	81	3781.51	0.943	0.4	18.6741	0	0	134	12
2015-11-11 09:24:02	88	4108.31	83	3874.88	0.947	0.4	18.6741	0.08	3.73483	266	58
2015-11-11 09:42:02	102	4761.9	100	4668.53	0.975	0.5	23.3427	0.28	13.0719	1174	539
2015-11-11 10:00:02	102	4761.9	99	4621.85	0.97	0.5	23.3427	0.28	13.0719	985	438
2015-11-11 10:18:02	109	5088.7	106	4948.65	0.974	0.5	23.3427	0.15	7.0028	1266	617
2015-11-11 10:36:02	105	4901.96	103	4808.59	0.982	0.5	23.3427	0.04	1.86741	1156	487
2015-11-11 10:52:02	87	4061.62	78	3641.46	0.897	0.4	18.6741	0	0	78	8
2015-11-11 11:10:02	92	4295.05	80	3734.83	0.877	0.4	18.6741	0	0	155	8
2015-11-11 11:28:02	88	4108.31	77	3594.77	0.88	0.4	18.6741	0.01	0.466853	175	30
2015-11-11 11:46:02	89	4155	76	3548.09	0.845	0.4	18.6741	0	0	75	20
2015-11-11 12:04:02	101	4715.22	93	4341.74	0.915	0.5	23.3427	0.03	1.40056	356	61
2015-11-11 12:20:02	106	4948.65	101	4715.22	0.952	0.5	23.3427	0.28	13.0719	785	376
2015-11-11 12:38:02	114	5322.13	110	5135.39	0.972	0.6	28.0112	0.23	10.7376	1301	730
2015-11-11 12:56:02	106	4948.65	98	4575.16	0.929	0.5	23.3427	0.14	6.53595	1127	541
2015-11-11 13:14:02	82	3828.2	74	3454.72	0.894	0.4	18.6741	0	0	365	53
2015-11-11 13:32:02	88	4108.31	76	3548.09	0.862	0.4	18.6741	0	0	93	2
2015-11-11 13:48:02	85	3968.25	70	3267.97	0.82	0.4	18.6741	0	0	47	11
2015-11-11 14:06:02	84	3921.57	69	3221.29	0.822	0.4	18.6741	0	0	69	19
2015-11-11 14:24:02	99	4621.85	84	3921.57	0.851	0.5	23.3427	0.01	0.466853	447	44
2015-11-11 14:42:02	105	4901.96	96	4481.79	0.913	0.5	23.3427	0.29	13.5387	732	238
2015-11-11 15:00:02	98	4575.16	96	4481.79	0.979	0.5	23.3427	0.25	11.6713	1279	703
2015-11-11 15:16:02	92	4295.05	83	3874.88	0.906	0.5	23.3427	0.02	0.933707	501	118
2015-11-11 15:34:02	88	4108.31	75	3501.4	0.856	0.4	18.6741	0	0	147	16
2015-11-11 15:52:02	87	4061.62	73	3408.03	0.844	0.4	18.6741	0.01	0.466853	85	19
2015-11-11 16:10:02	86	4014.94	67	3127.92	0.787	0.4	18.6741	0	0	87	4
2015-11-11 16:28:02	85	3968.25	70	3267.97	0.824	0.4	18.6741	0	0	190	41
2015-11-11 16:44:02	86	4014.94	66	3081.23	0.762	0.4	18.6741	0.01	0.466853	49	10
2015-11-11 17:02:02	82	3828.2	61	2847.81	0.743	0.4	18.6741	0.01	0.466853	69	20
2015-11-11 17:20:02	89	4155	68	3174.6	0.767	0.4	18.6741	0	0	13	0
2015-11-11 17:38:02	102	4761.9	86	4014.94	0.839	0.5	23.3427	0.2	9.33707	607	139
2015-11-11 17:56:02	88	4108.31	82	3828.2	0.927	0.4	18.6741	0.1	4.66853	1230	605
2015-11-11 18:12:02	114	5322.13	103	4808.59	0.898	0.6	28.0112	0.2	9.33707	1384	758
2015-11-11 18:30:02	107	4995.33	98	4575.16	0.918	0.5	23.3427	0.19	8.87021	1093	548
2015-11-11 18:48:02	88	4108.31	72	3361.34	0.813	0.4	18.6741	0	0	237	33
2015-11-11 19:06:02	95	4435.11	75	3501.4	0.789	0.5	23.3427	0	0	35	12
2015-11-11 19:24:02	89	4155	73	3408.03	0.821	0.4	18.6741	0	0	68	32
2015-11-11 19:40:02	89	4155	70	3267.97	0.786	0.4	18.6741	0.01	0.466853	76	34
2015-11-11 19:58:02	106	4948.65	88	4108.31	0.828	0.5	23.3427	0.1	4.66853	1219	388
2015-11-11 20:16:02	107	4995.33	92	4295.05	0.858	0.5	23.3427	0.06	2.80112	1276	464
2015-11-11 20:34:02	91	4248.37	69	3221.29	0.76	0.4	18.6741	0	0	31	7
2015-11-11 20:52:02	89	4155	70	3267.97	0.778	0.4	18.6741	0	0	29	8
2015-11-11 21:08:02	86	4014.94	64	2987.86	0.745	0.4	18.6741	0.01	0.466853	108	31
2015-11-11 21:26:02	89	4155	66	3081.23	0.744	0.4	18.6741	0	0	35	7
2015-11-11 21:44:02	82	3828.2	63	2941.18	0.768	0.4	18.6741	0.01	0.466853	91	10
2015-11-11 22:02:02	100	4668.53	85	3968.25	0.844	0.5	23.3427	0.01	0.466853	686	134
2015-11-11 22:20:02	91	4248.37	80	3734.83	0.882	0.4	18.6741	0.21	9.80392	965	315
2015-11-11 22:36:02	86	4014.94	69	3221.29	0.803	0.4	18.6741	0	0	143	6
2015-11-11 22:54:02	90	4201.68	70	3267.97	0.772	0.4	18.6741	0.01	0.466853	98	14
2015-11-11 23:12:02	96	4481.79	74	3454.72	0.768	0.5	23.3427	0.01	0.466853	58	26
2015-11-11 23:30:02	83	3874.88	65	3034.55	0.788	0.4	18.6741	0.01	0.466853	69	13
2015-11-11 23:48:02	97	4528.48	84	3921.57	0.87	0.5	23.3427	0	0	580	122
2015-11-12 00:04:02	105	4901.96	96	4481.79	0.918	0.5	23.3427	0.34	15.873	979	492
2015-11-12 00:22:02	106	4948.65	101	4715.22	0.948	0.5	23.3427	0.25	11.6713	1555	751
2015-11-12 00:40:02	89	4155	76	3548.09	0.852	0.4	18.6741	0	0	305	40
2015-11-12 00:58:02	73	3408.03	59	2754.44	0.813	0.3	14.0056	0.01	0.466853	28	7
2015-11-12 01:16:02	85	3968.25	70	3267.97	0.818	0.4	18.6741	0.01	0.466853	153	11
2015-11-12 01:32:02	87	4061.62	70	3267.97	0.805	0.4	18.6741	0.01	0.466853	157	28
2015-11-12 01:50:02	102	4761.9	96	4481.79	0.949	0.5	23.3427	0.28	13.0719	680	199
2015-11-12 02:08:02	104	4855.28	100	4668.53	0.957	0.5	23.3427	0.2	9.33707	1203	503
2015-11-12 02:26:02	86	4014.94	77	3594.77	0.894	0.4	18.6741	0.01	0.466853	599	102
2015-11-12 02:44:02	80	3734.83	69	3221.29	0.858	0.4	18.6741	0.01	0.466853	90	6
2015-11-12 03:00:02	84	3921.57	68	3174.6	0.804	0.4	18.6741	0	0	49	21
2015-11-12 03:18:02	81	3781.51	66	3081.23	0.818	0.4	18.6741	0.01	0.466853	130	28
2015-11-12 03:36:02	102	4761.9	93	4341.74	0.916	0.5	23.3427	0.25	11.6713	929	332
2015-11-12 03:54:02	98	4575.16	96	4481.79	0.981	0.5	23.3427	0.24	11.2045	1274	596
2015-11-12 04:12:02	79	3688.14	75	3501.4	0.939	0.4	18.6741	0.03	1.40056	534	131
2015-11-12 04:28:02	83	3874.88	74	3454.72	0.892	0.4	18.6741	0.01	0.466853	34	10
2015-11-12 04:46:02	95	4435.11	79	3688.14	0.828	0.5	23.3427	0	0	118	21
2015-11-12 05:04:02	97	4528.48	85	3968.25	0.876	0.5	23.3427	0.12	5.60224	501	79
2015-11-12 05:22:02	107	4995.33	102	4761.9	0.956	0.5	23.3427	0.27	12.605	1045	512
2015-11-12 05:40:02	96	4481.79	94	4388.42	0.985	0.5	23.3427	0.15	7.0028	889	176
2015-11-12 05:56:02	110	5135.39	108	5042.02	0.982	0.6	28.0112	0.18	8.40336	856	400
2015-11-12 06:14:02	106	4948.65	100	4668.53	0.947	0.5	23.3427	0.09	4.20168	1000	342
2015-11-12 06:32:02	86	4014.94	76	3548.09	0.889	0.4	18.6741	0.01	0.466853	76	19
2015-11-12 06:50:02	106	4948.65	100	4668.53	0.941	0.5	23.3427	0.05	2.33427	268	51
2015-11-12 07:08:02	92	4295.05	93	4341.74	1.007	0.5	23.3427	0.26	12.1382	749	288
2015-11-12 07:24:02	113	5275.44	111	5182.07	0.985	0.6	28.0112	0.1	4.66853	726	239
2015-11-12 07:42:02	82	3828.2	72	3361.34	0.871	0.4	18.6741	0	0	163	17
2015-11-12 08:00:02	100	4668.53	100	4668.53	0.999	0.5	23.3427	0.12	5.60224	801	259
2015-11-12 08:18:02	102	4761.9	100	4668.53	0.974	0.5	23.3427	0.14	6.53595	1065	548
2015-11-12 08:36:02	114	5322.13	113	5275.44	0.989	0.6	28.0112	0.03	1.40056	1374	617
2015-11-12 08:52:02	104	4855.28	95	4435.11	0.91	0.5	23.3427	0.01	0.466853	925	366
2015-11-12 09:10:02	119	5555.56	106	4948.65	0.89	0.6	28.0112	0.03	1.40056	1158	515
2015-11-12 09:28:02	103	4808.59	86	4014.94	0.83	0.5	23.3427	0	0	1091	453
2015-11-12 09:46:02	73	3408.03	58	2707.75	0.792	0.4	18.6741	0	0	350	93
2015-11-12 10:04:02	87	4061.62	69	3221.29	0.791	0.4	18.6741	0	0	24	5
2015-11-12 10:20:02	104	4855.28	89	4155	0.853	0.5	23.3427	0.09	4.20168	761	396
2015-11-12 10:38:02	101	4715.22	96	4481.79	0.949	0.5	23.3427	0.32	14.9393	727	304
2015-11-12 10:56:02	99	4621.85	95	4435.11	0.958	0.5	23.3427	0.17	7.93651	609	234
2015-11-12 11:14:02	84	3921.57	76	3548.09	0.906	0.4	18.6741	0.03	1.40056	562	140
2015-11-12 11:32:02	81	3781.51	77	3594.77	0.949	0.4	18.6741	0	0	51	15
2015-11-12 11:48:02	87	4061.62	78	3641.46	0.896	0.4	18.6741	0	0	142	36
2015-11-12 12:06:02	79	3688.14	71	3314.66	0.895	0.4	18.6741	0.01	0.466853	261	29
2015-11-12 12:24:02	105	4901.96	92	4295.05	0.874	0.5	23.3427	0	0	581	67
2015-11-12 12:42:02	97	4528.48	91	4248.37	0.93	0.5	23.3427	0.38	17.7404	453	151
2015-11-12 13:00:02	89	4155	88	4108.31	0.99	0.4	18.6741	0.19	8.87021	835	311
2015-11-12 13:16:02	106	4948.65	101	4715.22	0.948	0.5	23.3427	0.12	5.60224	877	275
2015-11-12 13:34:02	88	4108.31	80	3734.83	0.903	0.4	18.6741	0	0	84	33
2015-11-12 13:52:02	83	3874.88	73	3408.03	0.883	0.4	18.6741	0	0	117	24
2015-11-12 14:10:02	101	4715.22	92	4295.05	0.911	0.5	23.3427	0	0	410	46
2015-11-12 14:28:02	93	4341.74	86	4014.94	0.918	0.5	23.3427	0.16	7.46965	204	65
2015-11-12 14:44:02	100	4668.53	96	4481.79	0.957	0.5	23.3427	0.34	15.873	537	130
2015-11-12 15:02:02	104	4855.28	99	4621.85	0.952	0.5	23.3427	0.14	6.53595	995	266
2015-11-12 15:20:02	88	4108.31	79	3688.14	0.9	0.4	18.6741	0	0	35	4
2015-11-12 15:38:02	92	4295.05	82	3828.2	0.892	0.5	23.3427	0	0	103	30
2015-11-12 15:56:02	94	4388.42	89	4155	0.941	0.5	23.3427	0.1	4.66853	537	63
2015-11-12 16:12:02	113	5275.44	111	5182.07	0.977	0.6	28.0112	0.25	11.6713	907	430
2015-11-12 16:30:02	110	5135.39	106	4948.65	0.963	0.6	28.0112	0.16	7.46965	1211	576
2015-11-12 16:48:02	99	4621.85	91	4248.37	0.921	0.5	23.3427	0.03	1.40056	966	276
2015-11-12 17:06:02	90	4201.68	77	3594.77	0.863	0.4	18.6741	0	0	31	9
2015-11-12 17:24:02	87	4061.62	73	3408.03	0.842	0.4	18.6741	0	0	207	18
2015-11-12 17:40:02	83	3874.88	67	3127.92	0.81	0.4	18.6741	0	0	228	16
2015-11-12 17:58:02	83	3874.88	66	3081.23	0.801	0.4	18.6741	0	0	161	31
2015-11-12 18:16:02	85	3968.25	67	3127.92	0.783	0.4	18.6741	0	0	24	6
2015-11-12 18:34:02	109	5088.7	93	4341.74	0.861	0.5	23.3427	0.15	7.0028	778	164
2015-11-12 18:52:02	104	4855.28	103	4808.59	0.989	0.5	23.3427	0.29	13.5387	1088	556
2015-11-12 19:08:02	108	5042.02	100	4668.53	0.932	0.5	23.3427	0.06	2.80112	953	354
2015-11-12 19:26:02	93	4341.74	79	3688.14	0.852	0.5	23.3427	0.01	0.466853	232	53
2015-11-12 19:44:02	87	4061.62	71	3314.66	0.822	0.4	18.6741	0	0	86	15
2015-11-12 20:02:02	87	4061.62	70	3267.97	0.809	0.4	18.6741	0	0	44	12
2015-11-12 20:20:02	84	3921.57	68	3174.6	0.813	0.4	18.6741	0	0	41	10
2015-11-12 20:36:02	91	4248.37	74	3454.72	0.804	0.4	18.6741	0	0	82	26
2015-11-12 20:54:02	95	4435.11	79	3688.14	0.829	0.5	23.3427	0	0	209	53
2015-11-12 21:12:02	98	4575.16	90	4201.68	0.926	0.5	23.3427	0.3	14.0056	742	170
2015-11-12 21:30:02	103	4808.59	98	4575.16	0.959	0.5	23.3427	0.05	2.33427	1361	559
2015-11-12 21:48:02	103	4808.59	99	4621.85	0.959	0.5	23.3427	0.15	7.0028	1219	455
2015-11-12 22:04:02	92	4295.05	80	3734.83	0.867	0.4	18.6741	0	0	48	10
2015-11-12 22:22:02	85	3968.25	72	3361.34	0.854	0.4	18.6741	0	0	50	15
2015-11-12 22:40:02	89	4155	75	3501.4	0.834	0.4	18.6741	0	0	67	18
2015-11-12 22:58:02	88	4108.31	74	3454.72	0.841	0.4	18.6741	0	0	55	19
2015-11-12 23:16:02	83	3874.88	74	3454.72	0.893	0.4	18.6741	0.05	2.33427	424	136
2015-11-12 23:32:02	79	3688.14	63	2941.18	0.797	0.4	18.6741	0.01	0.466853	37	11
2015-11-12 23:50:02	86	4014.94	69	3221.29	0.806	0.4	18.6741	0	0	63	25
2015-11-13 00:08:02	96	4481.79	82	3828.2	0.856	0.5	23.3427	0.02	0.933707	236	60
2015-11-13 00:26:02	86	4014.94	70	3267.97	0.814	0.4	18.6741	0.01	0.466853	66	19
2015-11-13 00:44:02	103	4808.59	90	4201.68	0.873	0.5	23.3427	0.18	8.40336	562	137
2015-11-13 01:00:02	104	4855.28	99	4621.85	0.946	0.5	23.3427	0.42	19.6078	1111	606
2015-11-13 01:18:02	108	5042.02	102	4761.9	0.948	0.5	23.3427	0.05	2.33427	1343	361
2015-11-13 01:36:02	105	4901.96	99	4621.85	0.945	0.5	23.3427	0.16	7.46965	1187	403
2015-11-13 01:54:02	90	4201.68	78	3641.46	0.873	0.4	18.6741	0	0	137	16
2015-11-13 02:12:02	83	3874.88	74	3454.72	0.895	0.4	18.6741	0	0	59	18
2015-11-13 02:28:02	82	3828.2	67	3127.92	0.815	0.4	18.6741	0.01	0.466853	100	4
2015-11-13 02:46:02	80	3734.83	67	3127.92	0.84	0.4	18.6741	0	0	69	25
2015-11-13 03:04:02	76	3548.09	60	2801.12	0.791	0.4	18.6741	0.01	0.466853	25	11
2015-11-13 03:22:02	106	4948.65	92	4295.05	0.865	0.5	23.3427	0.13	6.06909	556	107
2015-11-13 03:40:02	97	4528.48	95	4435.11	0.984	0.5	23.3427	0.27	12.605	1007	565
2015-11-13 03:56:02	108	5042.02	103	4808.59	0.956	0.5	23.3427	0.19	8.87021	800	230
2015-11-13 04:14:02	82	3828.2	75	3501.4	0.922	0.4	18.6741	0.01	0.466853	583	80
2015-11-13 04:32:02	83	3874.88	76	3548.09	0.912	0.4	18.6741	0	0	14	5
2015-11-13 04:50:02	87	4061.62	77	3594.77	0.888	0.4	18.6741	0	0	38	13
2015-11-13 05:08:02	78	3641.46	70	3267.97	0.891	0.4	18.6741	0.01	0.466853	134	50
2015-11-13 05:24:02	105	4901.96	92	4295.05	0.882	0.5	23.3427	0.01	0.466853	336	61
2015-11-13 05:42:02	100	4668.53	93	4341.74	0.928	0.5	23.3427	0.37	17.2736	651	186
2015-11-13 06:00:02	95	4435.11	91	4248.37	0.956	0.5	23.3427	0.16	7.46965	901	359
2015-11-13 06:18:02	79	3688.14	75	3501.4	0.958	0.4	18.6741	0.09	4.20168	432	166
2015-11-13 06:36:02	83	3874.88	80	3734.83	0.962	0.4	18.6741	0.01	0.466853	360	131
2015-11-13 06:52:02	81	3781.51	71	3314.66	0.874	0.4	18.6741	0.01	0.466853	38	10
2015-11-13 07:10:02	105	4901.96	98	4575.16	0.935	0.5	23.3427	0.06	2.80112	600	105

## Sheet: s719
Subject ID	s719
Weight(g)	18.75	0.01875
Sex	Male
Diet	normal chow diet
Chamber Temperature: 220C
DATE/TIME	VO2		VCO2		RER	HEAT		FEED1		XTOT	XAMB
	ml/hr	ml/kg/hr	ml/hr	ml/kg/hr		kcal/hr	kcal/kg/hr	GRAMS	g/kg	COUNTS	COUNTS
2015-11-11 07:08:02	78	4160	71	3786.67	0.911	0.4	21.3333	0	0	160	21
2015-11-11 07:26:02	97	5173.33	94	5013.33	0.972	0.5	26.6667	0.03	1.6	614	221
2015-11-11 07:44:02	91	4853.33	89	4746.67	0.977	0.5	26.6667	0.24	12.8	591	170
2015-11-11 08:02:02	101	5386.67	101	5386.67	0.997	0.5	26.6667	0.12	6.4	1079	583
2015-11-11 08:18:02	92	4906.67	88	4693.33	0.962	0.5	26.6667	0.09	4.8	426	131
2015-11-11 08:36:02	87	4640	81	4320	0.934	0.4	21.3333	0	0	80	20
2015-11-11 08:54:02	95	5066.67	87	4640	0.909	0.5	26.6667	0.03	1.6	108	42
2015-11-11 09:12:02	99	5280	97	5173.33	0.981	0.5	26.6667	0.18	9.6	540	205
2015-11-11 09:30:02	105	5600	105	5600	1.005	0.5	26.6667	0.18	9.6	1113	527
2015-11-11 09:46:02	98	5226.67	94	5013.33	0.964	0.5	26.6667	0.21	11.2	862	402
2015-11-11 10:04:02	101	5386.67	96	5120	0.955	0.5	26.6667	0.13	6.93333	945	472
2015-11-11 10:22:02	89	4746.67	84	4480	0.942	0.4	21.3333	0.2	10.6667	738	303
2015-11-11 10:40:02	101	5386.67	97	5173.33	0.963	0.5	26.6667	0.04	2.13333	890	358
2015-11-11 10:58:02	87	4640	78	4160	0.904	0.4	21.3333	0	0	54	5
2015-11-11 11:14:02	87	4640	74	3946.67	0.848	0.4	21.3333	0.01	0.533333	15	3
2015-11-11 11:32:02	90	4800	76	4053.33	0.838	0.4	21.3333	0	0	69	17
2015-11-11 11:50:02	94	5013.33	89	4746.67	0.945	0.5	26.6667	0.17	9.06667	669	261
2015-11-11 12:08:02	87	4640	79	4213.33	0.908	0.4	21.3333	0	0	285	82
2015-11-11 12:26:02	85	4533.33	72	3840	0.843	0.4	21.3333	0	0	17	5
2015-11-11 12:42:02	81	4320	72	3840	0.883	0.4	21.3333	0.13	6.93333	102	17
2015-11-11 13:00:02	90	4800	83	4426.67	0.92	0.4	21.3333	0.07	3.73333	607	211
2015-11-11 13:18:02	103	5493.33	98	5226.67	0.953	0.5	26.6667	0.14	7.46667	608	239
2015-11-11 13:36:02	100	5333.33	96	5120	0.963	0.5	26.6667	0.11	5.86667	1172	606
2015-11-11 13:54:02	88	4693.33	86	4586.67	0.977	0.4	21.3333	0.1	5.33333	496	140
2015-11-11 14:10:02	92	4906.67	83	4426.67	0.898	0.5	26.6667	0	0	14	2
2015-11-11 14:28:02	82	4373.33	70	3733.33	0.854	0.4	21.3333	0	0	208	3
2015-11-11 14:46:02	87	4640	71	3786.67	0.815	0.4	21.3333	0	0	35	11
2015-11-11 15:04:02	89	4746.67	72	3840	0.808	0.4	21.3333	0.01	0.533333	14	8
2015-11-11 15:22:02	82	4373.33	75	4000	0.921	0.4	21.3333	0.17	9.06667	220	70
2015-11-11 15:38:02	85	4533.33	78	4160	0.92	0.4	21.3333	0.07	3.73333	872	442
2015-11-11 15:56:02	111	5920	104	5546.67	0.932	0.6	32	0.02	1.06667	1538	883
2015-11-11 16:14:02	96	5120	81	4320	0.843	0.5	26.6667	0.02	1.06667	858	382
2015-11-11 16:32:02	89	4746.67	75	4000	0.84	0.4	21.3333	0.1	5.33333	523	230
2015-11-11 16:50:02	99	5280	90	4800	0.906	0.5	26.6667	0.12	6.4	925	457
2015-11-11 17:06:02	87	4640	73	3893.33	0.833	0.4	21.3333	0.05	2.66667	1115	574
2015-11-11 17:24:02	108	5760	97	5173.33	0.899	0.5	26.6667	0.1	5.33333	769	333
2015-11-11 17:42:02	90	4800	72	3840	0.795	0.4	21.3333	0	0	65	14
2015-11-11 18:00:02	88	4693.33	69	3680	0.785	0.4	21.3333	0	0	48	12
2015-11-11 18:18:02	86	4586.67	70	3733.33	0.806	0.4	21.3333	0	0	26	0
2015-11-11 18:34:02	109	5813.33	92	4906.67	0.846	0.5	26.6667	0.01	0.533333	349	60
2015-11-11 18:52:02	102	5440	89	4746.67	0.876	0.5	26.6667	0.15	8	1416	892
2015-11-11 19:10:02	96	5120	77	4106.67	0.798	0.5	26.6667	0	0	984	391
2015-11-11 19:28:02	92	4906.67	70	3733.33	0.761	0.4	21.3333	0	0	39	2
2015-11-11 19:46:02	92	4906.67	73	3893.33	0.796	0.4	21.3333	0	0	111	11
2015-11-11 20:02:02	88	4693.33	66	3520	0.752	0.4	21.3333	0	0	19	4
2015-11-11 20:20:02	79	4213.33	60	3200	0.762	0.4	21.3333	0	0	145	26
2015-11-11 20:38:02	83	4426.67	63	3360	0.753	0.4	21.3333	0	0	72	14
2015-11-11 20:56:02	86	4586.67	66	3520	0.774	0.4	21.3333	0	0	41	3
2015-11-11 21:14:02	91	4853.33	76	4053.33	0.834	0.4	21.3333	0.06	3.2	220	75
2015-11-11 21:30:02	98	5226.67	88	4693.33	0.895	0.5	26.6667	0.12	6.4	953	530
2015-11-11 21:48:02	100	5333.33	89	4746.67	0.886	0.5	26.6667	0.02	1.06667	1781	980
2015-11-11 22:06:02	85	4533.33	66	3520	0.779	0.4	21.3333	0	0	365	29
2015-11-11 22:24:02	89	4746.67	69	3680	0.78	0.4	21.3333	0.01	0.533333	47	8
2015-11-11 22:42:02	83	4426.67	66	3520	0.805	0.4	21.3333	0	0	71	8
2015-11-11 22:58:02	101	5386.67	81	4320	0.802	0.5	26.6667	0.01	0.533333	89	15
2015-11-11 23:16:02	90	4800	74	3946.67	0.822	0.4	21.3333	0.15	8	755	252
2015-11-11 23:34:02	83	4426.67	72	3840	0.859	0.4	21.3333	0.03	1.6	529	175
2015-11-11 23:52:02	85	4533.33	71	3786.67	0.832	0.4	21.3333	0.01	0.533333	24	4
2015-11-12 00:10:02	81	4320	67	3573.33	0.824	0.4	21.3333	0	0	101	30
2015-11-12 00:26:02	97	5173.33	80	4266.67	0.829	0.5	26.6667	0.01	0.533333	297	65
2015-11-12 00:44:02	79	4213.33	61	3253.33	0.774	0.4	21.3333	0	0	47	4
2015-11-12 01:02:02	81	4320	62	3306.67	0.768	0.4	21.3333	0.01	0.533333	45	11
2015-11-12 01:20:02	91	4853.33	71	3786.67	0.786	0.4	21.3333	0.05	2.66667	138	47
2015-11-12 01:38:02	100	5333.33	94	5013.33	0.935	0.5	26.6667	0.12	6.4	1029	508
2015-11-12 01:54:02	90	4800	82	4373.33	0.911	0.4	21.3333	0.14	7.46667	376	91
2015-11-12 02:12:02	84	4480	72	3840	0.863	0.4	21.3333	0	0	385	41
2015-11-12 02:30:02	84	4480	66	3520	0.793	0.4	21.3333	0	0	42	13
2015-11-12 02:48:02	83	4426.67	65	3466.67	0.785	0.4	21.3333	0.01	0.533333	41	15
2015-11-12 03:06:02	78	4160	64	3413.33	0.82	0.4	21.3333	0.01	0.533333	66	11
2015-11-12 03:22:02	85	4533.33	65	3466.67	0.76	0.4	21.3333	0	0	51	17
2015-11-12 03:40:02	88	4693.33	74	3946.67	0.837	0.4	21.3333	0.1	5.33333	256	49
2015-11-12 03:58:02	98	5226.67	91	4853.33	0.929	0.5	26.6667	0.13	6.93333	1334	816
2015-11-12 04:16:02	100	5333.33	97	5173.33	0.971	0.5	26.6667	0.16	8.53333	500	111
2015-11-12 04:34:02	83	4426.67	76	4053.33	0.917	0.4	21.3333	0	0	200	31
2015-11-12 04:50:02	88	4693.33	71	3786.67	0.813	0.4	21.3333	0.01	0.533333	32	5
2015-11-12 05:08:02	82	4373.33	67	3573.33	0.824	0.4	21.3333	0.01	0.533333	118	14
2015-11-12 05:26:02	96	5120	80	4266.67	0.836	0.5	26.6667	0.1	5.33333	620	190
2015-11-12 05:44:02	72	3840	70	3733.33	0.971	0.4	21.3333	0.24	12.8	664	307
2015-11-12 06:02:02	78	4160	75	4000	0.962	0.4	21.3333	0.02	1.06667	230	51
2015-11-12 06:18:02	86	4586.67	74	3946.67	0.86	0.4	21.3333	0	0	24	10
2015-11-12 06:36:02	102	5440	91	4853.33	0.886	0.5	26.6667	0.03	1.6	338	109
2015-11-12 06:54:02	98	5226.67	96	5120	0.976	0.5	26.6667	0.18	9.6	224	46
2015-11-12 07:12:02	82	4373.33	76	4053.33	0.925	0.4	21.3333	0	0	11	0
2015-11-12 07:30:02	88	4693.33	83	4426.67	0.947	0.4	21.3333	0.06	3.2	448	83
2015-11-12 07:46:02	86	4586.67	79	4213.33	0.92	0.4	21.3333	0.15	8	248	38
2015-11-12 08:04:02	83	4426.67	78	4160	0.937	0.4	21.3333	0.13	6.93333	1565	917
2015-11-12 08:22:02	81	4320	75	4000	0.927	0.4	21.3333	0.08	4.26667	262	29
2015-11-12 08:40:02	98	5226.67	91	4853.33	0.928	0.5	26.6667	0.03	1.6	290	89
2015-11-12 08:58:02	94	5013.33	95	5066.67	1.012	0.5	26.6667	0.23	12.2667	691	301
2015-11-12 09:14:02	66	3520	61	3253.33	0.926	0.3	16	0.2	10.6667	761	317
2015-11-12 09:32:02	96	5120	89	4746.67	0.932	0.5	26.6667	0.01	0.533333	241	43
2015-11-12 09:50:02	77	4106.67	73	3893.33	0.945	0.4	21.3333	0.15	8	277	83
2015-11-12 10:08:02	97	5173.33	96	5120	0.984	0.5	26.6667	0.09	4.8	1382	794
2015-11-12 10:26:02	89	4746.67	87	4640	0.987	0.4	21.3333	0.07	3.73333	754	325
2015-11-12 10:42:02	96	5120	93	4960	0.961	0.5	26.6667	0.27	14.4	543	206
2015-11-12 11:00:02	100	5333.33	98	5226.67	0.979	0.5	26.6667	0.22	11.7333	506	160
2015-11-12 11:18:02	104	5546.67	100	5333.33	0.967	0.5	26.6667	0.05	2.66667	723	347
2015-11-12 11:36:02	90	4800	86	4586.67	0.96	0.4	21.3333	0	0	30	1
2015-11-12 11:54:02	89	4746.67	84	4480	0.948	0.4	21.3333	0.01	0.533333	63	22
2015-11-12 12:10:02	88	4693.33	79	4213.33	0.897	0.4	21.3333	0.13	6.93333	195	51
2015-11-12 12:28:02	92	4906.67	89	4746.67	0.97	0.5	26.6667	0.12	6.4	1034	504
2015-11-12 12:46:02	90	4800	85	4533.33	0.947	0.4	21.3333	0.11	5.86667	952	428
2015-11-12 13:04:02	111	5920	109	5813.33	0.987	0.6	32	0.19	10.1333	1078	620
2015-11-12 13:22:02	81	4320	79	4213.33	0.972	0.4	21.3333	0.11	5.86667	1056	530
2015-11-12 13:38:02	88	4693.33	83	4426.67	0.938	0.4	21.3333	0	0	1060	493
2015-11-12 13:56:02	106	5653.33	102	5440	0.966	0.5	26.6667	0.12	6.4	1032	560
2015-11-12 14:14:02	102	5440	97	5173.33	0.951	0.5	26.6667	0.13	6.93333	597	294
2015-11-12 14:32:02	87	4640	82	4373.33	0.935	0.4	21.3333	0	0	253	55
2015-11-12 14:50:02	86	4586.67	79	4213.33	0.915	0.4	21.3333	0	0	59	4
2015-11-12 15:06:02	89	4746.67	76	4053.33	0.86	0.4	21.3333	0.01	0.533333	33	7
2015-11-12 15:24:02	106	5653.33	93	4960	0.879	0.5	26.6667	0	0	114	30
2015-11-12 15:42:02	83	4426.67	77	4106.67	0.928	0.4	21.3333	0.16	8.53333	356	124
2015-11-12 16:00:02	97	5173.33	94	5013.33	0.978	0.5	26.6667	0.11	5.86667	1002	473
2015-11-12 16:18:02	89	4746.67	86	4586.67	0.96	0.4	21.3333	0.06	3.2	657	213
2015-11-12 16:34:02	100	5333.33	86	4586.67	0.859	0.5	26.6667	0.01	0.533333	20	6
2015-11-12 16:52:02	94	5013.33	78	4160	0.837	0.5	26.6667	0.01	0.533333	28	3
2015-11-12 17:10:02	93	4960	81	4320	0.874	0.5	26.6667	0.09	4.8	354	130
2015-11-12 17:28:02	92	4906.67	88	4693.33	0.963	0.5	26.6667	0.14	7.46667	226	68
2015-11-12 17:46:02	97	5173.33	86	4586.67	0.887	0.5	26.6667	0.01	0.533333	93	6
2015-11-12 18:02:02	79	4213.33	70	3733.33	0.877	0.4	21.3333	0.07	3.73333	487	241
2015-11-12 18:20:02	98	5226.67	93	4960	0.946	0.5	26.6667	0.04	2.13333	1790	931
2015-11-12 18:38:02	109	5813.33	101	5386.67	0.925	0.5	26.6667	0.1	5.33333	868	376
2015-11-12 18:56:02	90	4800	82	4373.33	0.908	0.4	21.3333	0.19	10.1333	1417	754
2015-11-12 19:14:02	98	5226.67	94	5013.33	0.956	0.5	26.6667	0.04	2.13333	1455	836
2015-11-12 19:30:02	121	6453.33	107	5706.67	0.887	0.6	32	0.03	1.6	826	407
2015-11-12 19:48:02	99	5280	80	4266.67	0.811	0.5	26.6667	0	0	176	21
2015-11-12 20:06:02	98	5226.67	84	4480	0.863	0.5	26.6667	0	0	147	28
2015-11-12 20:24:02	97	5173.33	79	4213.33	0.811	0.5	26.6667	0	0	70	17
2015-11-12 20:42:02	83	4426.67	67	3573.33	0.807	0.4	21.3333	0	0	12	6
2015-11-12 20:58:02	92	4906.67	72	3840	0.774	0.4	21.3333	0	0	80	18
2015-11-12 21:16:02	105	5600	89	4746.67	0.848	0.5	26.6667	0.04	2.13333	567	154
2015-11-12 21:34:02	102	5440	95	5066.67	0.928	0.5	26.6667	0.16	8.53333	689	277
2015-11-12 21:52:02	92	4906.67	74	3946.67	0.802	0.4	21.3333	0	0	49	7
2015-11-12 22:10:02	81	4320	65	3466.67	0.805	0.4	21.3333	0	0	35	7
2015-11-12 22:26:02	93	4960	74	3946.67	0.793	0.4	21.3333	0.01	0.533333	35	11
2015-11-12 22:44:02	85	4533.33	66	3520	0.782	0.4	21.3333	0.01	0.533333	108	22
2015-11-12 23:02:02	85	4533.33	67	3573.33	0.788	0.4	21.3333	0	0	48	15
2015-11-12 23:20:02	85	4533.33	66	3520	0.78	0.4	21.3333	0	0	69	28
2015-11-12 23:38:02	85	4533.33	70	3733.33	0.821	0.4	21.3333	0	0	58	9
2015-11-12 23:54:02	114	6080	91	4853.33	0.797	0.5	26.6667	0.06	3.2	977	500
2015-11-13 00:12:02	98	5226.67	88	4693.33	0.891	0.5	26.6667	0.29	15.4667	1301	691
2015-11-13 00:30:02	81	4320	67	3573.33	0.829	0.4	21.3333	0	0	346	78
2015-11-13 00:48:02	88	4693.33	69	3680	0.783	0.4	21.3333	0.01	0.533333	52	8
2015-11-13 01:06:02	81	4320	67	3573.33	0.825	0.4	21.3333	0	0	48	6
2015-11-13 01:22:02	85	4533.33	65	3466.67	0.767	0.4	21.3333	0	0	83	14
2015-11-13 01:40:02	88	4693.33	70	3733.33	0.793	0.4	21.3333	0.01	0.533333	76	21
2015-11-13 01:58:02	76	4053.33	59	3146.67	0.78	0.4	21.3333	0	0	399	63
2015-11-13 02:16:02	82	4373.33	63	3360	0.768	0.4	21.3333	0	0	121	24
2015-11-13 02:34:02	84	4480	67	3573.33	0.794	0.4	21.3333	0.01	0.533333	13	6
2015-11-13 02:50:02	78	4160	59	3146.67	0.752	0.4	21.3333	0.01	0.533333	24	6
2015-11-13 03:08:02	96	5120	82	4373.33	0.86	0.5	26.6667	0.26	13.8667	598	209
2015-11-13 03:26:02	87	4640	82	4373.33	0.941	0.4	21.3333	0.21	11.2	1199	683
2015-11-13 03:44:02	104	5546.67	97	5173.33	0.935	0.5	26.6667	0.01	0.533333	941	341
2015-11-13 04:02:02	73	3893.33	66	3520	0.901	0.4	21.3333	0.01	0.533333	92	22
2015-11-13 04:18:02	89	4746.67	75	4000	0.846	0.4	21.3333	0.01	0.533333	74	11
2015-11-13 04:36:02	75	4000	61	3253.33	0.813	0.4	21.3333	0	0	27	1
2015-11-13 04:54:02	91	4853.33	73	3893.33	0.804	0.4	21.3333	0.01	0.533333	20	3
2015-11-13 05:12:02	77	4106.67	61	3253.33	0.795	0.4	21.3333	0.01	0.533333	52	12
2015-11-13 05:30:02	85	4533.33	69	3680	0.815	0.4	21.3333	0	0	49	9
2015-11-13 05:46:02	97	5173.33	86	4586.67	0.885	0.5	26.6667	0.13	6.93333	450	107
2015-11-13 06:04:02	103	5493.33	98	5226.67	0.95	0.5	26.6667	0.15	8	639	282
2015-11-13 06:22:02	86	4586.67	74	3946.67	0.856	0.4	21.3333	0	0	179	20
2015-11-13 06:40:02	86	4586.67	70	3733.33	0.811	0.4	21.3333	0.01	0.533333	23	5
2015-11-13 06:58:02	80	4266.67	67	3573.33	0.835	0.4	21.3333	0.01	0.533333	53	18
2015-11-13 07:14:02	88	4693.33	77	4106.67	0.878	0.4	21.3333	0.14	7.46667	486	151

## Sheet: s717
Subject ID	s717
Weight(g)	20.56	0.02056
Sex	Male
Diet	normal chow diet
Chamber Temperature: 220C
DATE/TIME	VO2		VCO2		RER	HEAT		FEED1		XTOT	XAMB
	ml/hr	ml/kg/hr	ml/hr	ml/kg/hr		kcal/hr	kcal/kg/hr	GRAMS	g/kg	COUNTS	COUNTS
2015-11-11 07:12:02	71	3453.31	65	3161.48	0.914	0.4	19.4553	0	0	105	40
2015-11-11 07:30:02	89	4328.79	85	4134.24	0.948	0.4	19.4553	0.09	4.37743	548	192
2015-11-11 07:48:02	88	4280.16	86	4182.88	0.976	0.4	19.4553	0.29	14.1051	748	364
2015-11-11 08:06:02	93	4523.35	92	4474.71	0.988	0.5	24.3191	0.2	9.72763	1167	586
2015-11-11 08:24:02	61	2966.93	62	3015.56	1.002	0.3	14.5914	0	0	99	17
2015-11-11 08:40:02	69	3356.03	65	3161.48	0.935	0.3	14.5914	0.01	0.486381	56	18
2015-11-11 08:58:02	72	3501.95	66	3210.12	0.927	0.4	19.4553	0	0	77	15
2015-11-11 09:16:02	68	3307.39	62	3015.56	0.918	0.3	14.5914	0.01	0.486381	34	18
2015-11-11 09:34:02	79	3842.41	76	3696.5	0.96	0.4	19.4553	0.14	6.80934	444	148
2015-11-11 09:52:02	82	3988.33	82	3988.33	1.006	0.4	19.4553	0.22	10.7004	1389	757
2015-11-11 10:08:02	86	4182.88	82	3988.33	0.96	0.4	19.4553	0.19	9.24125	766	316
2015-11-11 10:26:02	95	4620.62	90	4377.43	0.957	0.5	24.3191	0.11	5.35019	1648	1008
2015-11-11 10:44:02	78	3793.77	74	3599.22	0.951	0.4	19.4553	0.01	0.486381	931	413
2015-11-11 11:02:02	87	4231.52	83	4036.96	0.955	0.4	19.4553	0	0	374	105
2015-11-11 11:20:02	63	3064.2	60	2918.29	0.952	0.3	14.5914	0.01	0.486381	89	14
2015-11-11 11:36:02	70	3404.67	63	3064.2	0.899	0.3	14.5914	0	0	46	13
2015-11-11 11:54:02	73	3550.58	60	2918.29	0.821	0.4	19.4553	0.01	0.486381	53	13
2015-11-11 12:12:02	72	3501.95	61	2966.93	0.839	0.4	19.4553	0	0	26	7
2015-11-11 12:30:02	93	4523.35	86	4182.88	0.921	0.5	24.3191	0.01	0.486381	415	122
2015-11-11 12:48:02	79	3842.41	80	3891.05	1.014	0.4	19.4553	0.24	11.6732	770	347
2015-11-11 13:04:02	92	4474.71	86	4182.88	0.933	0.5	24.3191	0.07	3.40467	1701	1092
2015-11-11 13:22:02	86	4182.88	82	3988.33	0.951	0.4	19.4553	0.06	2.91829	886	412
2015-11-11 13:40:02	72	3501.95	63	3064.2	0.875	0.4	19.4553	0.01	0.486381	34	6
2015-11-11 13:58:02	70	3404.67	60	2918.29	0.851	0.3	14.5914	0	0	122	22
2015-11-11 14:16:02	67	3258.75	58	2821.01	0.871	0.3	14.5914	0.01	0.486381	24	3
2015-11-11 14:32:02	81	3939.69	69	3356.03	0.854	0.4	19.4553	0	0	93	26
2015-11-11 14:50:02	73	3550.58	62	3015.56	0.851	0.4	19.4553	0.16	7.7821	374	114
2015-11-11 15:08:02	90	4377.43	85	4134.24	0.951	0.4	19.4553	0.14	6.80934	1429	836
2015-11-11 15:26:02	68	3307.39	61	2966.93	0.896	0.3	14.5914	0	0	368	61
2015-11-11 15:44:02	64	3112.84	55	2675.1	0.851	0.3	14.5914	0.01	0.486381	49	19
2015-11-11 16:00:02	69	3356.03	56	2723.74	0.815	0.3	14.5914	0	0	42	10
2015-11-11 16:18:02	74	3599.22	59	2869.65	0.799	0.4	19.4553	0.01	0.486381	64	10
2015-11-11 16:36:02	70	3404.67	56	2723.74	0.803	0.3	14.5914	0.01	0.486381	63	11
2015-11-11 16:54:02	78	3793.77	65	3161.48	0.833	0.4	19.4553	0.01	0.486381	94	20
2015-11-11 17:12:02	81	3939.69	74	3599.22	0.909	0.4	19.4553	0.15	7.29572	675	171
2015-11-11 17:28:02	74	3599.22	68	3307.39	0.922	0.4	19.4553	0.15	7.29572	1367	801
2015-11-11 17:46:02	80	3891.05	73	3550.58	0.915	0.4	19.4553	0.03	1.45914	1066	405
2015-11-11 18:04:02	70	3404.67	60	2918.29	0.853	0.3	14.5914	0.01	0.486381	120	16
2015-11-11 18:22:02	68	3307.39	56	2723.74	0.824	0.3	14.5914	0	0	54	16
2015-11-11 18:40:02	74	3599.22	63	3064.2	0.851	0.4	19.4553	0.01	0.486381	105	14
2015-11-11 18:56:02	75	3647.86	64	3112.84	0.854	0.4	19.4553	0	0	648	66
2015-11-11 19:14:02	84	4085.6	64	3112.84	0.757	0.4	19.4553	0.01	0.486381	83	14
2015-11-11 19:32:02	100	4863.81	86	4182.88	0.864	0.5	24.3191	0.13	6.32296	1306	639
2015-11-11 19:50:02	99	4815.18	94	4571.98	0.954	0.5	24.3191	0.23	11.1868	1536	971
2015-11-11 20:08:02	91	4426.07	92	4474.71	1.01	0.5	24.3191	0.25	12.1595	1116	528
2015-11-11 20:24:02	90	4377.43	84	4085.6	0.934	0.4	19.4553	0.26	12.6459	1270	752
2015-11-11 20:42:02	96	4669.26	90	4377.43	0.935	0.5	24.3191	0.17	8.26848	1387	756
2015-11-11 21:00:02	92	4474.71	87	4231.52	0.942	0.5	24.3191	0.05	2.43191	1180	666
2015-11-11 21:18:02	77	3745.14	71	3453.31	0.925	0.4	19.4553	0	0	200	12
2015-11-11 21:36:02	78	3793.77	73	3550.58	0.941	0.4	19.4553	0.01	0.486381	158	30
2015-11-11 21:52:02	91	4426.07	78	3793.77	0.857	0.4	19.4553	0	0	107	32
2015-11-11 22:10:02	95	4620.62	93	4523.35	0.978	0.5	24.3191	0.26	12.6459	1226	567
2015-11-11 22:28:02	97	4717.9	95	4620.62	0.98	0.5	24.3191	0.21	10.214	1322	799
2015-11-11 22:46:02	97	4717.9	96	4669.26	0.99	0.5	24.3191	0.2	9.72763	984	435
2015-11-11 23:04:02	71	3453.31	71	3453.31	0.999	0.4	19.4553	0.09	4.37743	536	214
2015-11-11 23:20:02	83	4036.96	80	3891.05	0.954	0.4	19.4553	0	0	67	23
2015-11-11 23:38:02	89	4328.79	86	4182.88	0.965	0.4	19.4553	0.13	6.32296	563	195
2015-11-11 23:56:02	100	4863.81	98	4766.54	0.988	0.5	24.3191	0.13	6.32296	1986	1172
2015-11-12 00:14:02	94	4571.98	92	4474.71	0.979	0.5	24.3191	0.13	6.32296	1776	1057
2015-11-12 00:32:02	97	4717.9	98	4766.54	1.005	0.5	24.3191	0.05	2.43191	1858	1026
2015-11-12 00:48:02	88	4280.16	84	4085.6	0.952	0.4	19.4553	0.1	4.86381	970	558
2015-11-12 01:06:02	83	4036.96	72	3501.95	0.874	0.4	19.4553	0	0	102	9
2015-11-12 01:24:02	79	3842.41	68	3307.39	0.867	0.4	19.4553	0.01	0.486381	62	25
2015-11-12 01:42:02	77	3745.14	66	3210.12	0.846	0.4	19.4553	0	0	145	18
2015-11-12 02:00:02	77	3745.14	67	3258.75	0.87	0.4	19.4553	0.01	0.486381	58	15
2015-11-12 02:16:02	79	3842.41	63	3064.2	0.797	0.4	19.4553	0	0	51	1
2015-11-12 02:34:02	78	3793.77	63	3064.2	0.8	0.4	19.4553	0	0	95	38
2015-11-12 02:52:02	73	3550.58	56	2723.74	0.775	0.3	14.5914	0.01	0.486381	36	18
2015-11-12 03:10:02	79	3842.41	62	3015.56	0.784	0.4	19.4553	0.01	0.486381	50	9
2015-11-12 03:28:02	92	4474.71	84	4085.6	0.912	0.5	24.3191	0.12	5.83658	1328	535
2015-11-12 03:44:02	82	3988.33	76	3696.5	0.932	0.4	19.4553	0.42	20.428	980	527
2015-11-12 04:02:02	76	3696.5	66	3210.12	0.871	0.4	19.4553	0.03	1.45914	461	128
2015-11-12 04:20:02	77	3745.14	61	2966.93	0.798	0.4	19.4553	0	0	44	6
2015-11-12 04:38:02	77	3745.14	64	3112.84	0.828	0.4	19.4553	0.01	0.486381	69	20
2015-11-12 04:56:02	75	3647.86	61	2966.93	0.822	0.4	19.4553	0	0	22	6
2015-11-12 05:12:02	92	4474.71	77	3745.14	0.839	0.4	19.4553	0.01	0.486381	162	30
2015-11-12 05:30:02	76	3696.5	57	2772.37	0.756	0.4	19.4553	0	0	212	41
2015-11-12 05:48:02	72	3501.95	56	2723.74	0.779	0.3	14.5914	0.01	0.486381	18	4
2015-11-12 06:06:02	100	4863.81	81	3939.69	0.805	0.5	24.3191	0.08	3.89105	543	129
2015-11-12 06:24:02	92	4474.71	90	4377.43	0.978	0.5	24.3191	0.23	11.1868	1543	896
2015-11-12 06:40:02	81	3939.69	76	3696.5	0.939	0.4	19.4553	0.25	12.1595	698	328
2015-11-12 06:58:02	68	3307.39	61	2966.93	0.895	0.3	14.5914	0.01	0.486381	485	161
2015-11-12 07:16:02	75	3647.86	66	3210.12	0.873	0.4	19.4553	0.01	0.486381	86	21
2015-11-12 07:34:02	73	3550.58	62	3015.56	0.846	0.4	19.4553	0	0	28	7
2015-11-12 07:52:02	68	3307.39	59	2869.65	0.867	0.3	14.5914	0.01	0.486381	56	18
2015-11-12 08:08:02	74	3599.22	59	2869.65	0.803	0.4	19.4553	0.01	0.486381	24	5
2015-11-12 08:26:02	76	3696.5	59	2869.65	0.779	0.4	19.4553	0.01	0.486381	111	17
2015-11-12 08:44:02	98	4766.54	85	4134.24	0.868	0.5	24.3191	0	0	466	33
2015-11-12 09:02:02	99	4815.18	96	4669.26	0.968	0.5	24.3191	0.3	14.5914	1423	860
2015-11-12 09:20:02	93	4523.35	92	4474.71	0.987	0.5	24.3191	0.23	11.1868	1188	745
2015-11-12 09:36:02	92	4474.71	88	4280.16	0.953	0.5	24.3191	0.15	7.29572	919	461
2015-11-12 09:54:02	90	4377.43	85	4134.24	0.945	0.4	19.4553	0.26	12.6459	948	356
2015-11-12 10:12:02	69	3356.03	67	3258.75	0.961	0.3	14.5914	0	0	203	49
2015-11-12 10:30:02	91	4426.07	85	4134.24	0.94	0.5	24.3191	0	0	860	484
2015-11-12 10:48:02	66	3210.12	61	2966.93	0.93	0.3	14.5914	0	0	128	28
2015-11-12 11:04:02	66	3210.12	59	2869.65	0.899	0.3	14.5914	0	0	35	17
2015-11-12 11:22:02	91	4426.07	80	3891.05	0.882	0.4	19.4553	0.03	1.45914	690	153
2015-11-12 11:40:02	87	4231.52	87	4231.52	0.993	0.4	19.4553	0.24	11.6732	835	361
2015-11-12 11:58:02	67	3258.75	62	3015.56	0.931	0.3	14.5914	0.01	0.486381	81	16
2015-11-12 12:16:02	64	3112.84	59	2869.65	0.916	0.3	14.5914	0.01	0.486381	108	47
2015-11-12 12:32:02	67	3258.75	58	2821.01	0.866	0.3	14.5914	0	0	46	2
2015-11-12 12:50:02	77	3745.14	60	2918.29	0.788	0.4	19.4553	0.01	0.486381	63	20
2015-11-12 13:08:02	89	4328.79	81	3939.69	0.912	0.4	19.4553	0	0	339	31
2015-11-12 13:26:02	88	4280.16	85	4134.24	0.971	0.4	19.4553	0.28	13.6187	825	318
2015-11-12 13:44:02	87	4231.52	85	4134.24	0.979	0.4	19.4553	0.15	7.29572	1106	514
2015-11-12 14:00:02	70	3404.67	62	3015.56	0.886	0.3	14.5914	0	0	69	19
2015-11-12 14:18:02	71	3453.31	60	2918.29	0.849	0.3	14.5914	0	0	50	17
2015-11-12 14:36:02	73	3550.58	61	2966.93	0.834	0.4	19.4553	0.01	0.486381	49	10
2015-11-12 14:54:02	69	3356.03	58	2821.01	0.834	0.3	14.5914	0.01	0.486381	39	16
2015-11-12 15:12:02	69	3356.03	60	2918.29	0.868	0.3	14.5914	0	0	36	5
2015-11-12 15:28:02	90	4377.43	81	3939.69	0.9	0.4	19.4553	0	0	436	49
2015-11-12 15:46:02	88	4280.16	83	4036.96	0.943	0.4	19.4553	0.29	14.1051	789	363
2015-11-12 16:04:02	82	3988.33	78	3793.77	0.941	0.4	19.4553	0.24	11.6732	1430	950
2015-11-12 16:22:02	67	3258.75	63	3064.2	0.935	0.3	14.5914	0.02	0.972763	568	138
2015-11-12 16:40:02	72	3501.95	68	3307.39	0.95	0.4	19.4553	0.01	0.486381	24	12
2015-11-12 16:56:02	75	3647.86	69	3356.03	0.932	0.4	19.4553	0	0	42	19
2015-11-12 17:14:02	73	3550.58	64	3112.84	0.871	0.4	19.4553	0.01	0.486381	53	15
2015-11-12 17:32:02	73	3550.58	67	3258.75	0.92	0.4	19.4553	0	0	222	40
2015-11-12 17:50:02	72	3501.95	61	2966.93	0.847	0.3	14.5914	0.01	0.486381	80	24
2015-11-12 18:08:02	100	4863.81	93	4523.35	0.93	0.5	24.3191	0.02	0.972763	976	312
2015-11-12 18:24:02	86	4182.88	81	3939.69	0.944	0.4	19.4553	0.29	14.1051	1471	938
2015-11-12 18:42:02	95	4620.62	88	4280.16	0.934	0.5	24.3191	0.21	10.214	1344	696
2015-11-12 19:00:02	70	3404.67	62	3015.56	0.886	0.3	14.5914	0	0	505	153
2015-11-12 19:18:02	78	3793.77	68	3307.39	0.876	0.4	19.4553	0	0	69	7
2015-11-12 19:36:02	68	3307.39	61	2966.93	0.903	0.3	14.5914	0.01	0.486381	82	30
2015-11-12 19:52:02	99	4815.18	89	4328.79	0.899	0.5	24.3191	0.1	4.86381	678	291
2015-11-12 20:10:02	81	3939.69	75	3647.86	0.929	0.4	19.4553	0.14	6.80934	844	384
2015-11-12 20:28:02	73	3550.58	63	3064.2	0.86	0.4	19.4553	0	0	107	50
2015-11-12 20:46:02	93	4523.35	84	4085.6	0.902	0.5	24.3191	0.09	4.37743	763	344
2015-11-12 21:04:02	80	3891.05	79	3842.41	0.986	0.4	19.4553	0.28	13.6187	1653	985
2015-11-12 21:20:02	74	3599.22	68	3307.39	0.922	0.4	19.4553	0.05	2.43191	548	172
2015-11-12 21:38:02	93	4523.35	81	3939.69	0.866	0.5	24.3191	0	0	96	21
2015-11-12 21:56:02	88	4280.16	83	4036.96	0.95	0.4	19.4553	0.26	12.6459	718	268
2015-11-12 22:14:02	99	4815.18	97	4717.9	0.979	0.5	24.3191	0.23	11.1868	1666	1008
2015-11-12 22:32:02	99	4815.18	97	4717.9	0.986	0.5	24.3191	0.1	4.86381	1332	680
2015-11-12 22:48:02	108	5252.92	104	5058.37	0.958	0.5	24.3191	0.17	8.26848	1750	1150
2015-11-12 23:06:02	104	5058.37	100	4863.81	0.958	0.5	24.3191	0.21	10.214	1418	790
2015-11-12 23:24:02	101	4912.45	97	4717.9	0.962	0.5	24.3191	0.16	7.7821	1299	702
2015-11-12 23:42:02	94	4571.98	91	4426.07	0.971	0.5	24.3191	0.2	9.72763	1655	932
2015-11-13 00:00:02	81	3939.69	82	3988.33	1.008	0.4	19.4553	0.19	9.24125	1468	848
2015-11-13 00:16:02	98	4766.54	93	4523.35	0.949	0.5	24.3191	0	0	976	382
2015-11-13 00:34:02	79	3842.41	72	3501.95	0.913	0.4	19.4553	0.01	0.486381	189	41
2015-11-13 00:52:02	83	4036.96	76	3696.5	0.916	0.4	19.4553	0	0	48	3
2015-11-13 01:10:02	81	3939.69	71	3453.31	0.872	0.4	19.4553	0.01	0.486381	162	28
2015-11-13 01:28:02	84	4085.6	74	3599.22	0.882	0.4	19.4553	0.01	0.486381	64	17
2015-11-13 01:44:02	78	3793.77	66	3210.12	0.846	0.4	19.4553	0	0	46	19
2015-11-13 02:02:02	74	3599.22	64	3112.84	0.865	0.4	19.4553	0.01	0.486381	263	39
2015-11-13 02:20:02	102	4961.09	88	4280.16	0.862	0.5	24.3191	0.08	3.89105	615	221
2015-11-13 02:38:02	100	4863.81	97	4717.9	0.976	0.5	24.3191	0.29	14.1051	1502	927
2015-11-13 02:56:02	81	3939.69	80	3891.05	0.986	0.4	19.4553	0.27	13.1323	1450	850
2015-11-13 03:12:02	89	4328.79	81	3939.69	0.911	0.4	19.4553	0.01	0.486381	606	235
2015-11-13 03:30:02	80	3891.05	68	3307.39	0.857	0.4	19.4553	0.01	0.486381	63	2
2015-11-13 03:48:02	81	3939.69	67	3258.75	0.828	0.4	19.4553	0.01	0.486381	149	38
2015-11-13 04:06:02	85	4134.24	72	3501.95	0.84	0.4	19.4553	0	0	171	28
2015-11-13 04:24:02	87	4231.52	80	3891.05	0.912	0.4	19.4553	0.15	7.29572	785	290
2015-11-13 04:40:02	76	3696.5	65	3161.48	0.85	0.4	19.4553	0.04	1.94553	188	48
2015-11-13 04:58:02	80	3891.05	65	3161.48	0.813	0.4	19.4553	0.01	0.486381	229	53
2015-11-13 05:16:02	83	4036.96	65	3161.48	0.785	0.4	19.4553	0.01	0.486381	224	74
2015-11-13 05:34:02	89	4328.79	74	3599.22	0.839	0.4	19.4553	0.04	1.94553	445	101
2015-11-13 05:52:02	81	3939.69	77	3745.14	0.957	0.4	19.4553	0.26	12.6459	1103	609
2015-11-13 06:08:02	96	4669.26	85	4134.24	0.892	0.5	24.3191	0.01	0.486381	1897	1139
2015-11-13 06:26:02	88	4280.16	73	3550.58	0.835	0.4	19.4553	0	0	1541	816
2015-11-13 06:44:02	84	4085.6	64	3112.84	0.76	0.4	19.4553	0.01	0.486381	118	17
2015-11-13 07:02:02	82	3988.33	63	3064.2	0.766	0.4	19.4553	0.01	0.486381	93	11
2015-11-13 07:20:02	60	2918.29	50	2431.91	0.835	0.3	14.5914	0	0	39	15

## Sheet: p792
Subject ID	p792
Weight(g)	17.1	0.0171
Sex	Male
Diet	normal chow diet
Chamber Temperature: 220C
DATE/TIME	VO2		VCO2		RER	HEAT		FEED1		XTOT	XAMB
	ml/hr	ml/kg/hr	ml/hr	ml/kg/hr		kcal/hr	kcal/kg/hr	GRAMS	g/kg	COUNTS	COUNTS
2015-11-11 07:02:02	83	4853.8	79	4619.88	0.951807	0.4	23.3918	0.06	3.50877	222	69
2015-11-11 07:20:02	82	4795.32	83	4853.8	1.0122	0.4	23.3918	0.36	21.0526	889	499
2015-11-11 07:36:02	67	3918.13	63	3684.21	0.940299	0.3	17.5439	0.12	7.01754	352	137
2015-11-11 07:54:02	65	3801.17	59	3450.29	0.907692	0.3	17.5439	0	0	69	24
2015-11-11 08:12:02	79	4619.88	78	4561.4	0.987342	0.4	23.3918	0.24	14.0351	674	401
2015-11-11 08:30:02	81	4736.84	79	4619.88	0.975309	0.4	23.3918	0.22	12.8655	775	420
2015-11-11 08:48:02	81	4736.84	80	4678.36	0.987654	0.4	23.3918	0.22	12.8655	938	522
2015-11-11 09:04:02	84	4912.28	81	4736.84	0.964286	0.4	23.3918	0.19	11.1111	958	513
2015-11-11 09:22:02	81	4736.84	79	4619.88	0.975309	0.4	23.3918	0.14	8.18713	1357	842
2015-11-11 09:40:02	87	5087.72	85	4970.76	0.977011	0.4	23.3918	0.1	5.84795	879	497
2015-11-11 09:58:02	73	4269.01	70	4093.57	0.958904	0.4	23.3918	0.21	12.2807	589	257
2015-11-11 10:16:02	64	3742.69	60	3508.77	0.9375	0.3	17.5439	0	0	594	221
2015-11-11 10:32:02	69	4035.09	64	3742.69	0.927536	0.3	17.5439	0	0	12	3
2015-11-11 10:50:02	66	3859.65	62	3625.73	0.939394	0.3	17.5439	0.01	0.584795	44	14
2015-11-11 11:08:02	66	3859.65	62	3625.73	0.939394	0.3	17.5439	0	0	66	33
2015-11-11 11:26:02	63	3684.21	59	3450.29	0.936508	0.3	17.5439	0.01	0.584795	92	32
2015-11-11 11:44:02	92	5380.12	90	5263.16	0.978261	0.5	29.2398	0	0	403	134
2015-11-11 12:00:02	87	5087.72	84	4912.28	0.965517	0.4	23.3918	0.23	13.4503	736	397
2015-11-11 12:18:02	71	4152.05	68	3976.61	0.957746	0.4	23.3918	0.26	15.2047	933	502
2015-11-11 12:36:02	72	4210.53	67	3918.13	0.930556	0.4	23.3918	0.16	9.35673	705	329
2015-11-11 12:54:02	83	4853.8	79	4619.88	0.951807	0.4	23.3918	0.04	2.33918	920	382
2015-11-11 13:12:02	64	3742.69	58	3391.81	0.90625	0.3	17.5439	0	0	31	8
2015-11-11 13:28:02	72	4210.53	62	3625.73	0.861111	0.4	23.3918	0.01	0.584795	14	5
2015-11-11 13:46:02	78	4561.4	70	4093.57	0.897436	0.4	23.3918	0.01	0.584795	125	20
2015-11-11 14:04:02	62	3625.73	53	3099.42	0.854839	0.3	17.5439	0.01	0.584795	386	121
2015-11-11 14:22:02	66	3859.65	54	3157.89	0.818182	0.3	17.5439	0.01	0.584795	21	7
2015-11-11 14:40:02	67	3918.13	51	2982.46	0.761194	0.3	17.5439	0	0	48	18
2015-11-11 14:56:02	70	4093.57	53	3099.42	0.757143	0.3	17.5439	0.01	0.584795	28	13
2015-11-11 15:14:02	66	3859.65	50	2923.98	0.757576	0.3	17.5439	0	0	56	22
2015-11-11 15:32:02	77	4502.92	62	3625.73	0.805195	0.4	23.3918	0.01	0.584795	44	12
2015-11-11 15:50:02	78	4561.4	68	3976.61	0.871795	0.4	23.3918	0.22	12.8655	984	418
2015-11-11 16:08:02	81	4736.84	73	4269.01	0.901235	0.4	23.3918	0.16	9.35673	799	432
2015-11-11 16:24:02	79	4619.88	68	3976.61	0.860759	0.4	23.3918	0.12	7.01754	723	346
2015-11-11 16:42:02	72	4210.53	61	3567.25	0.847222	0.4	23.3918	0.01	0.584795	464	203
2015-11-11 17:00:02	70	4093.57	57	3333.33	0.814286	0.3	17.5439	0.01	0.584795	85	15
2015-11-11 17:18:02	70	4093.57	55	3216.37	0.785714	0.3	17.5439	0.01	0.584795	38	15
2015-11-11 17:36:02	70	4093.57	55	3216.37	0.785714	0.3	17.5439	0	0	13	3
2015-11-11 17:52:02	69	4035.09	53	3099.42	0.768116	0.3	17.5439	0.01	0.584795	37	12
2015-11-11 18:10:02	60	3508.77	44	2573.1	0.733333	0.3	17.5439	0.02	1.16959	16	7
2015-11-11 18:28:02	86	5029.24	69	4035.09	0.802326	0.4	23.3918	0.01	0.584795	225	68
2015-11-11 18:46:02	70	4093.57	51	2982.46	0.728571	0.3	17.5439	0.01	0.584795	187	13
2015-11-11 19:04:02	87	5087.72	68	3976.61	0.781609	0.4	23.3918	0.01	0.584795	139	40
2015-11-11 19:20:02	97	5672.51	77	4502.92	0.793814	0.5	29.2398	0.13	7.60234	1278	663
2015-11-11 19:38:02	97	5672.51	87	5087.72	0.896907	0.5	29.2398	0.17	9.94152	1450	901
2015-11-11 19:56:02	89	5204.68	82	4795.32	0.921348	0.4	23.3918	0.24	14.0351	1051	530
2015-11-11 20:14:02	89	5204.68	84	4912.28	0.94382	0.4	23.3918	0.15	8.77193	1075	576
2015-11-11 20:32:02	78	4561.4	69	4035.09	0.884615	0.4	23.3918	0	0	587	307
2015-11-11 20:48:02	79	4619.88	62	3625.73	0.78481	0.4	23.3918	0.01	0.584795	8	0
2015-11-11 21:06:02	77	4502.92	62	3625.73	0.805195	0.4	23.3918	0	0	23	4
2015-11-11 21:24:02	75	4385.96	62	3625.73	0.826667	0.4	23.3918	0.01	0.584795	60	17
2015-11-11 21:42:02	76	4444.44	65	3801.17	0.855263	0.4	23.3918	0	0	117	34
2015-11-11 22:00:02	85	4970.76	78	4561.4	0.917647	0.4	23.3918	0.37	21.6374	792	376
2015-11-11 22:16:02	89	5204.68	85	4970.76	0.955056	0.4	23.3918	0.23	13.4503	1458	927
2015-11-11 22:34:02	90	5263.16	87	5087.72	0.966667	0.5	29.2398	0.25	14.6199	1178	675
2015-11-11 22:52:02	87	5087.72	84	4912.28	0.965517	0.4	23.3918	0.38	22.2222	1273	700
2015-11-11 23:10:02	74	4327.49	67	3918.13	0.905405	0.4	23.3918	0	0	75	7
2015-11-11 23:28:02	79	4619.88	70	4093.57	0.886076	0.4	23.3918	0	0	20	5
2015-11-11 23:44:02	79	4619.88	66	3859.65	0.835443	0.4	23.3918	0.01	0.584795	28	12
2015-11-12 00:02:02	75	4385.96	63	3684.21	0.84	0.4	23.3918	0.01	0.584795	29	11
2015-11-12 00:20:02	75	4385.96	60	3508.77	0.8	0.4	23.3918	0	0	12	4
2015-11-12 00:38:02	84	4912.28	74	4327.49	0.880952	0.4	23.3918	0.01	0.584795	194	55
2015-11-12 00:56:02	91	5321.64	88	5146.2	0.967033	0.5	29.2398	0.28	16.3743	1413	846
2015-11-12 01:12:02	87	5087.72	86	5029.24	0.988506	0.4	23.3918	0.14	8.18713	556	292
2015-11-12 01:30:02	86	5029.24	82	4795.32	0.953488	0.4	23.3918	0.16	9.35673	866	450
2015-11-12 01:48:02	77	4502.92	67	3918.13	0.87013	0.4	23.3918	0	0	31	13
2015-11-12 02:06:02	72	4210.53	60	3508.77	0.833333	0.3	17.5439	0.01	0.584795	12	2
2015-11-12 02:24:02	79	4619.88	64	3742.69	0.810127	0.4	23.3918	0	0	21	5
2015-11-12 02:40:02	72	4210.53	57	3333.33	0.791667	0.3	17.5439	0.01	0.584795	82	22
2015-11-12 02:58:02	73	4269.01	57	3333.33	0.780822	0.4	23.3918	0.01	0.584795	123	45
2015-11-12 03:16:02	85	4970.76	71	4152.05	0.835294	0.4	23.3918	0	0	158	50
2015-11-12 03:34:02	75	4385.96	71	4152.05	0.946667	0.4	23.3918	0.35	20.4678	914	470
2015-11-12 03:52:02	90	5263.16	87	5087.72	0.966667	0.4	23.3918	0.17	9.94152	1588	968
2015-11-12 04:08:02	88	5146.2	81	4736.84	0.920455	0.4	23.3918	0.01	0.584795	338	111
2015-11-12 04:26:02	75	4385.96	63	3684.21	0.84	0.4	23.3918	0.01	0.584795	14	0
2015-11-12 04:44:02	80	4678.36	68	3976.61	0.85	0.4	23.3918	0	0	231	89
2015-11-12 05:02:02	76	4444.44	60	3508.77	0.789474	0.4	23.3918	0	0	23	9
2015-11-12 05:20:02	83	4853.8	73	4269.01	0.879518	0.4	23.3918	0.01	0.584795	119	26
2015-11-12 05:36:02	75	4385.96	65	3801.17	0.866667	0.4	23.3918	0.34	19.883	624	287
2015-11-12 05:54:02	85	4970.76	83	4853.8	0.976471	0.4	23.3918	0.14	8.18713	1529	937
2015-11-12 06:12:02	85	4970.76	81	4736.84	0.952941	0.4	23.3918	0.19	11.1111	1116	654
2015-11-12 06:30:02	63	3684.21	56	3274.85	0.888889	0.3	17.5439	0	0	218	69
2015-11-12 06:48:02	67	3918.13	59	3450.29	0.880597	0.3	17.5439	0.01	0.584795	1	0
2015-11-12 07:04:02	69	4035.09	58	3391.81	0.84058	0.3	17.5439	0	0	5	1
2015-11-12 07:22:02	66	3859.65	54	3157.89	0.818182	0.3	17.5439	0.01	0.584795	51	19
2015-11-12 07:40:02	76	4444.44	65	3801.17	0.855263	0.4	23.3918	0.17	9.94152	572	231
2015-11-12 07:58:02	72	4210.53	72	4210.53	1	0.4	23.3918	0.3	17.5439	765	385
2015-11-12 08:16:02	93	5438.6	91	5321.64	0.978495	0.5	29.2398	0.14	8.18713	1268	681
2015-11-12 08:32:02	60	3508.77	55	3216.37	0.916667	0.3	17.5439	0.01	0.584795	138	44
2015-11-12 08:50:02	73	4269.01	65	3801.17	0.890411	0.4	23.3918	0.01	0.584795	33	13
2015-11-12 09:08:02	88	5146.2	86	5029.24	0.977273	0.4	23.3918	0.35	20.4678	740	296
2015-11-12 09:26:02	89	5204.68	86	5029.24	0.966292	0.4	23.3918	0.25	14.6199	1199	710
2015-11-12 09:44:02	91	5321.64	89	5204.68	0.978022	0.5	29.2398	0.29	16.9591	1062	564
2015-11-12 10:00:02	90	5263.16	85	4970.76	0.944444	0.4	23.3918	0.25	14.6199	785	393
2015-11-12 10:18:02	83	4853.8	83	4853.8	1	0.4	23.3918	0	0	374	210
2015-11-12 10:36:02	62	3625.73	59	3450.29	0.951613	0.3	17.5439	0.02	1.16959	146	23
2015-11-12 10:54:02	64	3742.69	61	3567.25	0.953125	0.3	17.5439	0	0	65	25
2015-11-12 11:12:02	79	4619.88	73	4269.01	0.924051	0.4	23.3918	0	0	50	20
2015-11-12 11:28:02	77	4502.92	73	4269.01	0.948052	0.4	23.3918	0.23	13.4503	612	253
2015-11-12 11:46:02	82	4795.32	80	4678.36	0.97561	0.4	23.3918	0.3	17.5439	1129	627
2015-11-12 12:04:02	77	4502.92	73	4269.01	0.948052	0.4	23.3918	0.27	15.7895	822	382
2015-11-12 12:22:02	74	4327.49	71	4152.05	0.959459	0.4	23.3918	0.13	7.60234	1084	601
2015-11-12 12:40:02	81	4736.84	78	4561.4	0.962963	0.4	23.3918	0.17	9.94152	1140	569
2015-11-12 12:56:02	76	4444.44	69	4035.09	0.907895	0.4	23.3918	0	0	330	70
2015-11-12 13:14:02	73	4269.01	69	4035.09	0.945205	0.4	23.3918	0.01	0.584795	129	34
2015-11-12 13:32:02	72	4210.53	68	3976.61	0.944444	0.4	23.3918	0	0	87	31
2015-11-12 13:50:02	67	3918.13	64	3742.69	0.955224	0.3	17.5439	0	0	46	21
2015-11-12 14:08:02	76	4444.44	71	4152.05	0.934211	0.4	23.3918	0	0	591	130
2015-11-12 14:24:02	71	4152.05	60	3508.77	0.84507	0.3	17.5439	0	0	28	15
2015-11-12 14:42:02	71	4152.05	61	3567.25	0.859155	0.3	17.5439	0.01	0.584795	36	8
2015-11-12 15:00:02	71	4152.05	59	3450.29	0.830986	0.3	17.5439	0	0	67	23
2015-11-12 15:18:02	88	5146.2	79	4619.88	0.897727	0.4	23.3918	0	0	262	36
2015-11-12 15:36:02	76	4444.44	72	4210.53	0.947368	0.4	23.3918	0.32	18.7135	744	304
2015-11-12 15:52:02	83	4853.8	80	4678.36	0.963855	0.4	23.3918	0.07	4.09357	921	485
2015-11-12 16:10:02	84	4912.28	78	4561.4	0.928571	0.4	23.3918	0.13	7.60234	1418	842
2015-11-12 16:28:02	76	4444.44	68	3976.61	0.894737	0.4	23.3918	0.08	4.67836	712	295
2015-11-12 16:46:02	71	4152.05	63	3684.21	0.887324	0.3	17.5439	0	0	111	16
2015-11-12 17:04:02	78	4561.4	65	3801.17	0.833333	0.4	23.3918	0	0	162	36
2015-11-12 17:20:02	66	3859.65	54	3157.89	0.818182	0.3	17.5439	0.01	0.584795	72	19
2015-11-12 17:38:02	73	4269.01	56	3274.85	0.767123	0.3	17.5439	0	0	35	6
2015-11-12 17:56:02	91	5321.64	77	4502.92	0.846154	0.4	23.3918	0.01	0.584795	903	340
2015-11-12 18:14:02	85	4970.76	80	4678.36	0.941176	0.4	23.3918	0.21	12.2807	1128	610
2015-11-12 18:32:02	86	5029.24	78	4561.4	0.906977	0.4	23.3918	0.01	0.584795	976	167
2015-11-12 18:48:02	77	4502.92	59	3450.29	0.766234	0.4	23.3918	0	0	159	60
2015-11-12 19:06:02	79	4619.88	59	3450.29	0.746835	0.4	23.3918	0.01	0.584795	49	14
2015-11-12 19:24:02	75	4385.96	57	3333.33	0.76	0.4	23.3918	0	0	50	19
2015-11-12 19:42:02	74	4327.49	58	3391.81	0.783784	0.4	23.3918	0.01	0.584795	27	13
2015-11-12 20:00:02	80	4678.36	69	4035.09	0.8625	0.4	23.3918	0.28	16.3743	617	203
2015-11-12 20:16:02	95	5555.56	87	5087.72	0.915789	0.5	29.2398	0.05	2.92398	1532	944
2015-11-12 20:34:02	86	5029.24	79	4619.88	0.918605	0.4	23.3918	0.38	22.2222	1150	672
2015-11-12 20:52:02	82	4795.32	77	4502.92	0.939024	0.4	23.3918	0.1	5.84795	2207	1511
2015-11-12 21:10:02	97	5672.51	90	5263.16	0.927835	0.5	29.2398	0.1	5.84795	1601	964
2015-11-12 21:28:02	90	5263.16	87	5087.72	0.966667	0.4	23.3918	0.25	14.6199	818	383
2015-11-12 21:44:02	76	4444.44	69	4035.09	0.907895	0.4	23.3918	0	0	301	49
2015-11-12 22:02:02	80	4678.36	71	4152.05	0.8875	0.4	23.3918	0	0	178	11
2015-11-12 22:20:02	96	5614.04	81	4736.84	0.84375	0.5	29.2398	0.01	0.584795	95	17
2015-11-12 22:38:02	78	4561.4	72	4210.53	0.923077	0.4	23.3918	0.22	12.8655	1063	504
2015-11-12 22:56:02	83	4853.8	75	4385.96	0.903614	0.4	23.3918	0.01	0.584795	361	90
2015-11-12 23:12:02	78	4561.4	66	3859.65	0.846154	0.4	23.3918	0	0	30	7
2015-11-12 23:30:02	83	4853.8	69	4035.09	0.831325	0.4	23.3918	0.01	0.584795	129	41
2015-11-12 23:48:02	88	5146.2	82	4795.32	0.931818	0.4	23.3918	0.36	21.0526	1092	548
2015-11-13 00:06:02	93	5438.6	90	5263.16	0.967742	0.5	29.2398	0.15	8.77193	2036	1352
2015-11-13 00:24:02	79	4619.88	79	4619.88	1	0.4	23.3918	0.28	16.3743	984	530
2015-11-13 00:40:02	97	5672.51	92	5380.12	0.948454	0.5	29.2398	0.3	17.5439	1370	743
2015-11-13 00:58:02	97	5672.51	93	5438.6	0.958763	0.5	29.2398	0.22	12.8655	1555	895
2015-11-13 01:16:02	80	4678.36	73	4269.01	0.9125	0.4	23.3918	0	0	419	58
2015-11-13 01:34:02	75	4385.96	69	4035.09	0.92	0.4	23.3918	0.01	0.584795	39	7
2015-11-13 01:52:02	73	4269.01	67	3918.13	0.917808	0.4	23.3918	0.01	0.584795	40	4
2015-11-13 02:08:02	81	4736.84	68	3976.61	0.839506	0.4	23.3918	0.01	0.584795	90	42
2015-11-13 02:26:02	74	4327.49	62	3625.73	0.837838	0.4	23.3918	0.01	0.584795	70	13
2015-11-13 02:44:02	81	4736.84	66	3859.65	0.814815	0.4	23.3918	0.01	0.584795	44	14
2015-11-13 03:02:02	75	4385.96	60	3508.77	0.8	0.4	23.3918	0.01	0.584795	63	19
2015-11-13 03:20:02	89	5204.68	75	4385.96	0.842697	0.4	23.3918	0.15	8.77193	639	185
2015-11-13 03:36:02	94	5497.08	89	5204.68	0.946809	0.5	29.2398	0.28	16.3743	1400	878
2015-11-13 03:54:02	82	4795.32	79	4619.88	0.963415	0.4	23.3918	0.38	22.2222	807	290
2015-11-13 04:12:02	87	5087.72	82	4795.32	0.942529	0.4	23.3918	0.01	0.584795	630	96
2015-11-13 04:30:02	82	4795.32	73	4269.01	0.890244	0.4	23.3918	0.01	0.584795	31	9
2015-11-13 04:48:02	77	4502.92	67	3918.13	0.87013	0.4	23.3918	0	0	43	17
2015-11-13 05:04:02	78	4561.4	65	3801.17	0.833333	0.4	23.3918	0.01	0.584795	65	21
2015-11-13 05:22:02	77	4502.92	61	3567.25	0.792208	0.4	23.3918	0.01	0.584795	25	6
2015-11-13 05:40:02	82	4795.32	64	3742.69	0.780488	0.4	23.3918	0.01	0.584795	129	28
2015-11-13 05:58:02	90	5263.16	76	4444.44	0.844444	0.4	23.3918	0.01	0.584795	220	36
2015-11-13 06:16:02	79	4619.88	76	4444.44	0.962025	0.4	23.3918	0.4	23.3918	1010	575
2015-11-13 06:32:02	76	4444.44	71	4152.05	0.934211	0.4	23.3918	0.29	16.9591	1491	977
2015-11-13 06:50:02	90	5263.16	85	4970.76	0.944444	0.4	23.3918	0.02	1.16959	1125	288
2015-11-13 07:08:02	73	4269.01	64	3742.69	0.876712	0.4	23.3918	0.01	0.584795	19	1

## Sheet: p790
Subject ID	p790
Weight(g)	16.73	0.01673
Sex	Male
Diet	normal chow diet
Chamber Temperature: 220C
DATE/TIME	VO2		VCO2		RER	HEAT		FEED1		XTOT	XAMB
	ml/hr	ml/kg/hr	ml/hr	ml/kg/hr		kcal/hr	kcal/kg/hr	GRAMS	g/kg	COUNTS	COUNTS
2015-11-11 07:06:02	75	4482.96	69	4124.33	0.92	0.4	23.9091	0.01	0.597729	110	33
2015-11-11 07:24:02	81	4841.6	76	4542.74	0.938272	0.4	23.9091	0.01	0.597729	78	21
2015-11-11 07:42:02	79	4722.06	72	4303.65	0.911392	0.4	23.9091	0.01	0.597729	458	57
2015-11-11 07:58:02	90	5379.56	82	4901.37	0.911111	0.4	23.9091	0.17	10.1614	456	235
2015-11-11 08:16:02	94	5618.65	93	5558.88	0.989362	0.5	29.8864	0.46	27.4955	1094	547
2015-11-11 08:34:02	94	5618.65	92	5499.1	0.978723	0.5	29.8864	0.35	20.9205	1175	682
2015-11-11 08:52:02	92	5499.1	91	5439.33	0.98913	0.5	29.8864	0.31	18.5296	979	562
2015-11-11 09:10:02	92	5499.1	90	5379.56	0.978261	0.5	29.8864	0.05	2.98864	909	382
2015-11-11 09:26:02	86	5140.47	82	4901.37	0.953488	0.4	23.9091	0	0	179	63
2015-11-11 09:44:02	80	4781.83	73	4363.42	0.9125	0.4	23.9091	0	0	13	7
2015-11-11 10:02:02	75	4482.96	68	4064.55	0.906667	0.4	23.9091	0	0	22	14
2015-11-11 10:20:02	86	5140.47	80	4781.83	0.930233	0.4	23.9091	0.08	4.78183	733	233
2015-11-11 10:38:02	79	4722.06	76	4542.74	0.962025	0.4	23.9091	0.26	15.5409	699	328
2015-11-11 10:54:02	78	4662.28	71	4243.87	0.910256	0.4	23.9091	0	0	303	54
2015-11-11 11:12:02	80	4781.83	67	4004.78	0.8375	0.4	23.9091	0.01	0.597729	27	8
2015-11-11 11:30:02	77	4602.51	64	3825.46	0.831169	0.4	23.9091	0	0	81	26
2015-11-11 11:48:02	73	4363.42	59	3526.6	0.808219	0.4	23.9091	0	0	35	16
2015-11-11 12:06:02	72	4303.65	59	3526.6	0.819444	0.3	17.9319	0	0	144	43
2015-11-11 12:22:02	76	4542.74	59	3526.6	0.776316	0.4	23.9091	0	0	14	2
2015-11-11 12:40:02	76	4542.74	59	3526.6	0.776316	0.4	23.9091	0	0	41	17
2015-11-11 12:58:02	95	5678.42	81	4841.6	0.852632	0.5	29.8864	0	0	307	59
2015-11-11 13:16:02	86	5140.47	80	4781.83	0.930233	0.4	23.9091	0.3	17.9319	1057	567
2015-11-11 13:34:02	81	4841.6	76	4542.74	0.938272	0.4	23.9091	0.12	7.17274	1438	829
2015-11-11 13:50:02	93	5558.88	83	4961.15	0.892473	0.5	29.8864	0	0	526	170
2015-11-11 14:08:02	75	4482.96	61	3646.14	0.813333	0.4	23.9091	0	0	92	16
2015-11-11 14:26:02	82	4901.37	65	3885.24	0.792683	0.4	23.9091	0.01	0.597729	173	44
2015-11-11 14:44:02	74	4423.19	55	3287.51	0.743243	0.4	23.9091	0	0	69	17
2015-11-11 15:02:02	72	4303.65	54	3227.73	0.75	0.3	17.9319	0	0	50	19
2015-11-11 15:18:02	89	5319.78	73	4363.42	0.820225	0.4	23.9091	0.01	0.597729	552	104
2015-11-11 15:36:02	75	4482.96	55	3287.51	0.733333	0.4	23.9091	0	0	282	90
2015-11-11 15:54:02	87	5200.24	68	4064.55	0.781609	0.4	23.9091	0	0	183	30
2015-11-11 16:12:02	90	5379.56	82	4901.37	0.911111	0.4	23.9091	0.25	14.9432	863	460
2015-11-11 16:30:02	77	4602.51	68	4064.55	0.883117	0.4	23.9091	0.01	0.597729	819	334
2015-11-11 16:46:02	74	4423.19	57	3407.05	0.77027	0.4	23.9091	0	0	39	5
2015-11-11 17:04:02	75	4482.96	58	3466.83	0.773333	0.4	23.9091	0.01	0.597729	46	15
2015-11-11 17:22:02	83	4961.15	65	3885.24	0.783133	0.4	23.9091	0	0	177	28
2015-11-11 17:40:02	75	4482.96	57	3407.05	0.76	0.4	23.9091	0.01	0.597729	93	23
2015-11-11 17:58:02	73	4363.42	60	3586.37	0.821918	0.4	23.9091	0.01	0.597729	106	34
2015-11-11 18:14:02	76	4542.74	57	3407.05	0.75	0.4	23.9091	0	0	37	11
2015-11-11 18:32:02	91	5439.33	73	4363.42	0.802198	0.4	23.9091	0.1	5.97729	466	128
2015-11-11 18:50:02	85	5080.69	78	4662.28	0.917647	0.4	23.9091	0.33	19.725	1113	625
2015-11-11 19:08:02	92	5499.1	84	5020.92	0.913043	0.5	29.8864	0.4	23.9091	1355	762
2015-11-11 19:26:02	104	6216.38	98	5857.74	0.942308	0.5	29.8864	0.34	20.3228	1396	796
2015-11-11 19:42:02	73	4363.42	64	3825.46	0.876712	0.4	23.9091	0.26	15.5409	516	208
2015-11-11 20:00:02	65	3885.24	55	3287.51	0.846154	0.3	17.9319	0.08	4.78183	1022	484
2015-11-11 20:18:02	94	5618.65	84	5020.92	0.893617	0.5	29.8864	0.05	2.98864	1067	400
2015-11-11 20:36:02	81	4841.6	65	3885.24	0.802469	0.4	23.9091	0	0	254	99
2015-11-11 20:54:02	77	4602.51	62	3705.92	0.805195	0.4	23.9091	0.01	0.597729	43	15
2015-11-11 21:10:02	78	4662.28	60	3586.37	0.769231	0.4	23.9091	0	0	70	12
2015-11-11 21:28:02	80	4781.83	61	3646.14	0.7625	0.4	23.9091	0.01	0.597729	230	42
2015-11-11 21:46:02	76	4542.74	59	3526.6	0.776316	0.4	23.9091	0.01	0.597729	36	12
2015-11-11 22:04:02	89	5319.78	72	4303.65	0.808989	0.4	23.9091	0.01	0.597729	218	52
2015-11-11 22:22:02	91	5439.33	88	5260.01	0.967033	0.5	29.8864	0.39	23.3114	768	415
2015-11-11 22:38:02	92	5499.1	89	5319.78	0.967391	0.5	29.8864	0.16	9.56366	705	240
2015-11-11 22:56:02	75	4482.96	64	3825.46	0.853333	0.4	23.9091	0	0	187	35
2015-11-11 23:14:02	78	4662.28	62	3705.92	0.794872	0.4	23.9091	0.01	0.597729	35	5
2015-11-11 23:32:02	77	4602.51	60	3586.37	0.779221	0.4	23.9091	0	0	55	13
2015-11-11 23:50:02	73	4363.42	59	3526.6	0.808219	0.3	17.9319	0.01	0.597729	24	12
2015-11-12 00:06:02	91	5439.33	77	4602.51	0.846154	0.4	23.9091	0.16	9.56366	537	172
2015-11-12 00:24:02	85	5080.69	80	4781.83	0.941176	0.4	23.9091	0.41	24.5069	988	611
2015-11-12 00:42:02	81	4841.6	78	4662.28	0.962963	0.4	23.9091	0.42	25.1046	1084	612
2015-11-12 01:00:02	89	5319.78	87	5200.24	0.977528	0.4	23.9091	0.35	20.9205	804	385
2015-11-12 01:18:02	77	4602.51	72	4303.65	0.935065	0.4	23.9091	0	0	78	19
2015-11-12 01:34:02	76	4542.74	69	4124.33	0.907895	0.4	23.9091	0.01	0.597729	38	15
2015-11-12 01:52:02	74	4423.19	66	3945.01	0.891892	0.4	23.9091	0.01	0.597729	21	4
2015-11-12 02:10:02	76	4542.74	67	4004.78	0.881579	0.4	23.9091	0.01	0.597729	263	52
2015-11-12 02:28:02	75	4482.96	60	3586.37	0.8	0.4	23.9091	0.01	0.597729	34	13
2015-11-12 02:46:02	85	5080.69	81	4841.6	0.952941	0.4	23.9091	0.23	13.7478	502	199
2015-11-12 03:02:02	77	4602.51	64	3825.46	0.831169	0.4	23.9091	0	0	192	18
2015-11-12 03:20:02	80	4781.83	63	3765.69	0.7875	0.4	23.9091	0.01	0.597729	70	28
2015-11-12 03:38:02	94	5618.65	81	4841.6	0.861702	0.5	29.8864	0.01	0.597729	192	38
2015-11-12 03:56:02	79	4722.06	75	4482.96	0.949367	0.4	23.9091	0.47	28.0932	1066	544
2015-11-12 04:14:02	93	5558.88	92	5499.1	0.989247	0.5	29.8864	0.34	20.3228	728	366
2015-11-12 04:30:02	87	5200.24	83	4961.15	0.954023	0.4	23.9091	0.21	12.5523	507	181
2015-11-12 04:48:02	89	5319.78	84	5020.92	0.94382	0.4	23.9091	0.01	0.597729	275	50
2015-11-12 05:06:02	85	5080.69	75	4482.96	0.882353	0.4	23.9091	0	0	36	11
2015-11-12 05:24:02	70	4184.1	63	3765.69	0.9	0.3	17.9319	0.01	0.597729	79	25
2015-11-12 05:42:02	81	4841.6	77	4602.51	0.950617	0.4	23.9091	0.2	11.9546	398	173
2015-11-12 05:58:02	97	5797.97	93	5558.88	0.958763	0.5	29.8864	0.21	12.5523	1344	819
2015-11-12 06:16:02	89	5319.78	84	5020.92	0.94382	0.4	23.9091	0.27	16.1387	878	457
2015-11-12 06:34:02	92	5499.1	86	5140.47	0.934783	0.5	29.8864	0.21	12.5523	651	282
2015-11-12 06:52:02	72	4303.65	66	3945.01	0.916667	0.4	23.9091	0.01	0.597729	7	0
2015-11-12 07:10:02	76	4542.74	71	4243.87	0.934211	0.4	23.9091	0	0	53	16
2015-11-12 07:26:02	91	5439.33	87	5200.24	0.956044	0.5	29.8864	0.01	0.597729	315	71
2015-11-12 07:44:02	75	4482.96	69	4124.33	0.92	0.4	23.9091	0.2	11.9546	686	320
2015-11-12 08:02:02	74	4423.19	71	4243.87	0.959459	0.4	23.9091	0.04	2.39091	788	414
2015-11-12 08:20:02	95	5678.42	88	5260.01	0.926316	0.5	29.8864	0.01	0.597729	1333	822
2015-11-12 08:38:02	85	5080.69	75	4482.96	0.882353	0.4	23.9091	0.01	0.597729	1070	559
2015-11-12 08:54:02	86	5140.47	71	4243.87	0.825581	0.4	23.9091	0.01	0.597729	900	322
2015-11-12 09:12:02	68	4064.55	51	3048.42	0.75	0.3	17.9319	0	0	195	36
2015-11-12 09:30:02	84	5020.92	61	3646.14	0.72619	0.4	23.9091	0.01	0.597729	32	7
2015-11-12 09:48:02	72	4303.65	53	3167.96	0.736111	0.3	17.9319	0	0	3	0
2015-11-12 10:06:02	76	4542.74	62	3705.92	0.815789	0.4	23.9091	0	0	141	36
2015-11-12 10:22:02	76	4542.74	66	3945.01	0.868421	0.4	23.9091	0.13	7.77047	262	139
2015-11-12 10:40:02	89	5319.78	84	5020.92	0.94382	0.4	23.9091	0.41	24.5069	532	266
2015-11-12 10:58:02	65	3885.24	62	3705.92	0.953846	0.3	17.9319	0.11	6.57501	350	137
2015-11-12 11:16:02	73	4363.42	66	3945.01	0.90411	0.4	23.9091	0	0	39	12
2015-11-12 11:34:02	66	3945.01	62	3705.92	0.939394	0.3	17.9319	0	0	73	13
2015-11-12 11:50:02	75	4482.96	68	4064.55	0.906667	0.4	23.9091	0.01	0.597729	124	30
2015-11-12 12:08:02	69	4124.33	58	3466.83	0.84058	0.3	17.9319	0	0	9	1
2015-11-12 12:26:02	75	4482.96	63	3765.69	0.84	0.4	23.9091	0.01	0.597729	59	23
2015-11-12 12:44:02	84	5020.92	74	4423.19	0.880952	0.4	23.9091	0.23	13.7478	552	141
2015-11-12 13:02:02	79	4722.06	79	4722.06	1	0.4	23.9091	0.36	21.5182	719	350
2015-11-12 13:18:02	77	4602.51	72	4303.65	0.935065	0.4	23.9091	0.3	17.9319	616	299
2015-11-12 13:36:02	75	4482.96	70	4184.1	0.933333	0.4	23.9091	0.06	3.58637	644	220
2015-11-12 13:54:02	77	4602.51	71	4243.87	0.922078	0.4	23.9091	0	0	62	12
2015-11-12 14:12:02	68	4064.55	62	3705.92	0.911765	0.3	17.9319	0.01	0.597729	52	11
2015-11-12 14:30:02	74	4423.19	67	4004.78	0.905405	0.4	23.9091	0	0	33	12
2015-11-12 14:46:02	78	4662.28	71	4243.87	0.910256	0.4	23.9091	0	0	203	27
2015-11-12 15:04:02	73	4363.42	60	3586.37	0.821918	0.4	23.9091	0.01	0.597729	24	6
2015-11-12 15:22:02	70	4184.1	59	3526.6	0.842857	0.3	17.9319	0	0	107	26
2015-11-12 15:40:02	79	4722.06	74	4423.19	0.936709	0.4	23.9091	0.25	14.9432	655	306
2015-11-12 15:58:02	88	5260.01	88	5260.01	1	0.4	23.9091	0.23	13.7478	980	536
2015-11-12 16:14:02	80	4781.83	75	4482.96	0.9375	0.4	23.9091	0.1	5.97729	555	203
2015-11-12 16:32:02	72	4303.65	66	3945.01	0.916667	0.4	23.9091	0	0	51	10
2015-11-12 16:50:02	78	4662.28	73	4363.42	0.935897	0.4	23.9091	0	0	87	21
2015-11-12 17:08:02	82	4901.37	74	4423.19	0.902439	0.4	23.9091	0	0	229	29
2015-11-12 17:26:02	70	4184.1	59	3526.6	0.842857	0.3	17.9319	0.01	0.597729	271	44
2015-11-12 17:42:02	75	4482.96	61	3646.14	0.813333	0.4	23.9091	0	0	41	10
2015-11-12 18:00:02	94	5618.65	85	5080.69	0.904255	0.5	29.8864	0.01	0.597729	447	158
2015-11-12 18:18:02	102	6096.83	100	5977.29	0.980392	0.5	29.8864	0.43	25.7023	1430	925
2015-11-12 18:36:02	100	5977.29	97	5797.97	0.97	0.5	29.8864	0.3	17.9319	1376	819
2015-11-12 18:54:02	99	5917.51	96	5738.19	0.969697	0.5	29.8864	0.22	13.15	1366	837
2015-11-12 19:10:02	98	5857.74	92	5499.1	0.938776	0.5	29.8864	0.14	8.3682	812	282
2015-11-12 19:28:02	83	4961.15	75	4482.96	0.903614	0.4	23.9091	0	0	115	25
2015-11-12 19:46:02	81	4841.6	75	4482.96	0.925926	0.4	23.9091	0.01	0.597729	45	5
2015-11-12 20:04:02	78	4662.28	73	4363.42	0.935897	0.4	23.9091	0	0	84	13
2015-11-12 20:22:02	93	5558.88	88	5260.01	0.946237	0.5	29.8864	0.12	7.17274	442	147
2015-11-12 20:38:02	86	5140.47	81	4841.6	0.94186	0.4	23.9091	0.37	22.116	956	530
2015-11-12 20:56:02	94	5618.65	91	5439.33	0.968085	0.5	29.8864	0.3	17.9319	1260	689
2015-11-12 21:14:02	71	4243.87	67	4004.78	0.943662	0.4	23.9091	0.04	2.39091	558	219
2015-11-12 21:32:02	79	4722.06	75	4482.96	0.949367	0.4	23.9091	0	0	86	29
2015-11-12 21:50:02	85	5080.69	80	4781.83	0.941176	0.4	23.9091	0	0	80	26
2015-11-12 22:06:02	92	5499.1	86	5140.47	0.934783	0.5	29.8864	0	0	177	49
2015-11-12 22:24:02	86	5140.47	81	4841.6	0.94186	0.4	23.9091	0.25	14.9432	729	242
2015-11-12 22:42:02	91	5439.33	89	5319.78	0.978022	0.5	29.8864	0.35	20.9205	737	392
2015-11-12 23:00:02	95	5678.42	94	5618.65	0.989474	0.5	29.8864	0.29	17.3341	1216	668
2015-11-12 23:18:02	90	5379.56	89	5319.78	0.988889	0.5	29.8864	0.2	11.9546	1333	724
2015-11-12 23:34:02	80	4781.83	75	4482.96	0.9375	0.4	23.9091	0.11	6.57501	825	377
2015-11-12 23:52:02	106	6335.92	102	6096.83	0.962264	0.5	29.8864	0.08	4.78183	718	207
2015-11-13 00:10:02	82	4901.37	76	4542.74	0.926829	0.4	23.9091	0	0	30	9
2015-11-13 00:28:02	77	4602.51	72	4303.65	0.935065	0.4	23.9091	0.01	0.597729	29	4
2015-11-13 00:46:02	75	4482.96	68	4064.55	0.906667	0.4	23.9091	0.01	0.597729	139	2
2015-11-13 01:02:02	81	4841.6	69	4124.33	0.851852	0.4	23.9091	0.02	1.19546	187	53
2015-11-13 01:20:02	83	4961.15	66	3945.01	0.795181	0.4	23.9091	0	0	61	16
2015-11-13 01:38:02	79	4722.06	64	3825.46	0.810127	0.4	23.9091	0.01	0.597729	62	14
2015-11-13 01:56:02	84	5020.92	68	4064.55	0.809524	0.4	23.9091	0	0	437	73
2015-11-13 02:14:02	85	5080.69	71	4243.87	0.835294	0.4	23.9091	0.01	0.597729	150	13
2015-11-13 02:30:02	85	5080.69	71	4243.87	0.835294	0.4	23.9091	0.18	10.7591	665	219
2015-11-13 02:48:02	90	5379.56	83	4961.15	0.922222	0.4	23.9091	0.29	17.3341	1006	574
2015-11-13 03:06:02	85	5080.69	76	4542.74	0.894118	0.4	23.9091	0.09	5.37956	381	90
2015-11-13 03:24:02	80	4781.83	67	4004.78	0.8375	0.4	23.9091	0	0	17	3
2015-11-13 03:42:02	81	4841.6	65	3885.24	0.802469	0.4	23.9091	0.01	0.597729	58	21
2015-11-13 03:58:02	85	5080.69	67	4004.78	0.788235	0.4	23.9091	0.01	0.597729	90	19
2015-11-13 04:16:02	78	4662.28	60	3586.37	0.769231	0.4	23.9091	0.01	0.597729	21	2
2015-11-13 04:34:02	76	4542.74	58	3466.83	0.763158	0.4	23.9091	0.01	0.597729	18	10
2015-11-13 04:52:02	79	4722.06	61	3646.14	0.772152	0.4	23.9091	0.01	0.597729	139	46
2015-11-13 05:10:02	73	4363.42	58	3466.83	0.794521	0.4	23.9091	0.01	0.597729	268	73
2015-11-13 05:26:02	80	4781.83	60	3586.37	0.75	0.4	23.9091	0	0	33	6
2015-11-13 05:44:02	93	5558.88	73	4363.42	0.784946	0.4	23.9091	0.17	10.1614	379	58
2015-11-13 06:02:02	91	5439.33	85	5080.69	0.934066	0.5	29.8864	0.34	20.3228	1343	851
2015-11-13 06:20:02	86	5140.47	80	4781.83	0.930233	0.4	23.9091	0.37	22.116	805	388
2015-11-13 06:38:02	86	5140.47	82	4901.37	0.953488	0.4	23.9091	0.27	16.1387	879	518
2015-11-13 06:54:02	76	4542.74	70	4184.1	0.921053	0.4	23.9091	0.02	1.19546	404	186
2015-11-13 07:12:02	72	4303.65	66	3945.01	0.916667	0.4	23.9091	0	0	46	4

## Sheet: p789
Subject ID	p789
Weight(g)	19.11	0.01911
Sex	Male
Diet	normal chow diet
Chamber Temperature: 220C
DATE/TIME	VO2		VCO2		RER	HEAT		FEED1		XTOT	XAMB
	ml/hr	ml/kg/hr	ml/hr	ml/kg/hr		kcal/hr	kcal/kg/hr	GRAMS	g/kg	COUNTS	COUNTS
2015-11-11 07:10:02	114	5965.46	112	5860.81	0.982456	0.6	31.3972	0.35	18.315	1012	508
2015-11-11 07:28:02	98	5128.21	94	4918.89	0.959184	0.5	26.1643	0.52	27.2109	998	503
2015-11-11 07:46:02	99	5180.53	94	4918.89	0.949495	0.5	26.1643	0.44	23.0246	1301	733
2015-11-11 08:04:02	103	5389.85	101	5285.19	0.980583	0.5	26.1643	0.26	13.6054	1475	851
2015-11-11 08:20:02	103	5389.85	99	5180.53	0.961165	0.5	26.1643	0.16	8.37258	1149	545
2015-11-11 08:38:02	109	5703.82	106	5546.83	0.972477	0.5	26.1643	0.25	13.0822	1645	1032
2015-11-11 08:56:02	104	5442.18	100	5232.86	0.961538	0.5	26.1643	0.24	12.5589	981	427
2015-11-11 09:14:02	87	4552.59	81	4238.62	0.931034	0.4	20.9314	0	0	452	194
2015-11-11 09:32:02	86	4500.26	82	4290.95	0.953488	0.4	20.9314	0.01	0.523286	58	14
2015-11-11 09:48:02	83	4343.28	76	3976.98	0.915663	0.4	20.9314	0	0	36	7
2015-11-11 10:06:02	84	4395.6	76	3976.98	0.904762	0.4	20.9314	0	0	40	15
2015-11-11 10:24:02	84	4395.6	74	3872.32	0.880952	0.4	20.9314	0	0	36	8
2015-11-11 10:42:02	82	4290.95	72	3767.66	0.878049	0.4	20.9314	0.01	0.523286	131	34
2015-11-11 11:00:02	108	5651.49	102	5337.52	0.944444	0.5	26.1643	0.05	2.61643	608	165
2015-11-11 11:16:02	108	5651.49	104	5442.18	0.962963	0.5	26.1643	0.37	19.3616	1032	576
2015-11-11 11:34:02	108	5651.49	104	5442.18	0.962963	0.5	26.1643	0.12	6.27943	1334	710
2015-11-11 11:52:02	108	5651.49	103	5389.85	0.953704	0.5	26.1643	0.38	19.8849	1219	634
2015-11-11 12:10:02	103	5389.85	98	5128.21	0.951456	0.5	26.1643	0.1	5.23286	837	354
2015-11-11 12:28:02	82	4290.95	75	3924.65	0.914634	0.4	20.9314	0.01	0.523286	14	3
2015-11-11 12:44:02	84	4395.6	75	3924.65	0.892857	0.4	20.9314	0	0	32	13
2015-11-11 13:02:02	90	4709.58	76	3976.98	0.844444	0.4	20.9314	0	0	31	6
2015-11-11 13:20:02	84	4395.6	70	3663	0.833333	0.4	20.9314	0	0	57	19
2015-11-11 13:38:02	86	4500.26	71	3715.33	0.825581	0.4	20.9314	0	0	37	14
2015-11-11 13:56:02	103	5389.85	93	4866.56	0.902913	0.5	26.1643	0.16	8.37258	742	278
2015-11-11 14:12:02	111	5808.48	105	5494.51	0.945946	0.6	31.3972	0.32	16.7452	1497	927
2015-11-11 14:30:02	105	5494.51	99	5180.53	0.942857	0.5	26.1643	0.09	4.70958	1088	490
2015-11-11 14:48:02	89	4657.25	76	3976.98	0.853933	0.4	20.9314	0.01	0.523286	55	12
2015-11-11 15:06:02	85	4447.93	71	3715.33	0.835294	0.4	20.9314	0	0	21	6
2015-11-11 15:24:02	92	4814.23	79	4133.96	0.858696	0.4	20.9314	0	0	81	20
2015-11-11 15:40:02	96	5023.55	83	4343.28	0.864583	0.5	26.1643	0	0	151	27
2015-11-11 15:58:02	87	4552.59	69	3610.68	0.793103	0.4	20.9314	0	0	87	20
2015-11-11 16:16:02	87	4552.59	67	3506.02	0.770115	0.4	20.9314	0	0	69	32
2015-11-11 16:34:02	98	5128.21	80	4186.29	0.816327	0.5	26.1643	0	0	169	32
2015-11-11 16:52:02	110	5756.15	101	5285.19	0.918182	0.5	26.1643	0.31	16.2219	1109	558
2015-11-11 17:08:02	100	5232.86	92	4814.23	0.92	0.5	26.1643	0.28	14.652	1238	758
2015-11-11 17:26:02	107	5599.16	97	5075.88	0.906542	0.5	26.1643	0.09	4.70958	1998	1245
2015-11-11 17:44:02	94	4918.89	80	4186.29	0.851064	0.5	26.1643	0	0	308	50
2015-11-11 18:02:02	90	4709.58	76	3976.98	0.844444	0.4	20.9314	0	0	70	13
2015-11-11 18:20:02	85	4447.93	71	3715.33	0.835294	0.4	20.9314	0	0	136	48
2015-11-11 18:36:02	88	4604.92	72	3767.66	0.818182	0.4	20.9314	0	0	74	33
2015-11-11 18:54:02	85	4447.93	67	3506.02	0.788235	0.4	20.9314	0	0	33	12
2015-11-11 19:12:02	108	5651.49	90	4709.58	0.833333	0.5	26.1643	0.01	0.523286	795	329
2015-11-11 19:30:02	91	4761.9	68	3558.35	0.747253	0.4	20.9314	0	0	326	71
2015-11-11 19:48:02	87	4552.59	66	3453.69	0.758621	0.4	20.9314	0	0	69	23
2015-11-11 20:04:02	90	4709.58	67	3506.02	0.744444	0.4	20.9314	0	0	32	12
2015-11-11 20:22:02	90	4709.58	68	3558.35	0.755556	0.4	20.9314	0	0	123	33
2015-11-11 20:40:02	107	5599.16	85	4447.93	0.794393	0.5	26.1643	0.11	5.75615	685	172
2015-11-11 20:58:02	102	5337.52	94	4918.89	0.921569	0.5	26.1643	0.39	20.4082	1582	960
2015-11-11 21:16:02	101	5285.19	97	5075.88	0.960396	0.5	26.1643	0.26	13.6054	1566	877
2015-11-11 21:32:02	101	5285.19	94	4918.89	0.930693	0.5	26.1643	0.19	9.94244	1302	764
2015-11-11 21:50:02	87	4552.59	81	4238.62	0.931034	0.4	20.9314	0.08	4.18629	547	159
2015-11-11 22:08:02	85	4447.93	75	3924.65	0.882353	0.4	20.9314	0	0	35	17
2015-11-11 22:26:02	89	4657.25	81	4238.62	0.910112	0.4	20.9314	0.01	0.523286	44	17
2015-11-11 22:44:02	87	4552.59	78	4081.63	0.896552	0.4	20.9314	0.01	0.523286	97	26
2015-11-11 23:00:02	87	4552.59	73	3819.99	0.83908	0.4	20.9314	0	0	152	16
2015-11-11 23:18:02	90	4709.58	74	3872.32	0.822222	0.4	20.9314	0	0	76	19
2015-11-11 23:36:02	87	4552.59	70	3663	0.804598	0.4	20.9314	0	0	53	9
2015-11-11 23:54:02	99	5180.53	89	4657.25	0.89899	0.5	26.1643	0.2	10.4657	666	277
2015-11-12 00:12:02	99	5180.53	97	5075.88	0.979798	0.5	26.1643	0.36	18.8383	1425	853
2015-11-12 00:28:02	106	5546.83	102	5337.52	0.962264	0.5	26.1643	0.14	7.32601	1478	859
2015-11-12 00:46:02	101	5285.19	97	5075.88	0.960396	0.5	26.1643	0.12	6.27943	811	299
2015-11-12 01:04:02	84	4395.6	74	3872.32	0.880952	0.4	20.9314	0	0	33	8
2015-11-12 01:22:02	85	4447.93	74	3872.32	0.870588	0.4	20.9314	0	0	33	11
2015-11-12 01:40:02	84	4395.6	69	3610.68	0.821429	0.4	20.9314	0.01	0.523286	44	15
2015-11-12 01:56:02	82	4290.95	70	3663	0.853659	0.4	20.9314	0	0	155	42
2015-11-12 02:14:02	88	4604.92	72	3767.66	0.818182	0.4	20.9314	0	0	123	36
2015-11-12 02:32:02	100	5232.86	92	4814.23	0.92	0.5	26.1643	0.32	16.7452	911	464
2015-11-12 02:50:02	104	5442.18	100	5232.86	0.961538	0.5	26.1643	0.28	14.652	1720	1046
2015-11-12 03:08:02	99	5180.53	95	4971.22	0.959596	0.5	26.1643	0.05	2.61643	714	202
2015-11-12 03:24:02	95	4971.22	81	4238.62	0.852632	0.5	26.1643	0	0	37	17
2015-11-12 03:42:02	90	4709.58	77	4029.3	0.855556	0.4	20.9314	0	0	32	11
2015-11-12 04:00:02	88	4604.92	70	3663	0.795455	0.4	20.9314	0	0	43	16
2015-11-12 04:18:02	85	4447.93	69	3610.68	0.811765	0.4	20.9314	0	0	40	15
2015-11-12 04:36:02	92	4814.23	78	4081.63	0.847826	0.4	20.9314	0	0	87	15
2015-11-12 04:52:02	89	4657.25	69	3610.68	0.775281	0.4	20.9314	0.01	0.523286	230	27
2015-11-12 05:10:02	102	5337.52	85	4447.93	0.833333	0.5	26.1643	0.03	1.56986	435	123
2015-11-12 05:28:02	99	5180.53	90	4709.58	0.909091	0.5	26.1643	0.47	24.5945	1344	821
2015-11-12 05:46:02	99	5180.53	98	5128.21	0.989899	0.5	26.1643	0.26	13.6054	1299	680
2015-11-12 06:04:02	86	4500.26	82	4290.95	0.953488	0.4	20.9314	0	0	182	58
2015-11-12 06:20:02	88	4604.92	76	3976.98	0.863636	0.4	20.9314	0	0	18	3
2015-11-12 06:38:02	90	4709.58	77	4029.3	0.855556	0.4	20.9314	0	0	104	14
2015-11-12 06:56:02	96	5023.55	91	4761.9	0.947917	0.5	26.1643	0.36	18.8383	641	252
2015-11-12 07:14:02	100	5232.86	99	5180.53	0.99	0.5	26.1643	0.29	15.1753	1428	843
2015-11-12 07:32:02	100	5232.86	96	5023.55	0.96	0.5	26.1643	0.06	3.13972	1015	476
2015-11-12 07:48:02	88	4604.92	76	3976.98	0.863636	0.4	20.9314	0	0	72	27
2015-11-12 08:06:02	105	5494.51	100	5232.86	0.952381	0.5	26.1643	0	0	333	61
2015-11-12 08:24:02	116	6070.12	113	5913.13	0.974138	0.6	31.3972	0.34	17.7917	1453	824
2015-11-12 08:42:02	106	5546.83	104	5442.18	0.981132	0.5	26.1643	0.3	15.6986	1326	778
2015-11-12 09:00:02	111	5808.48	111	5808.48	1	0.6	31.3972	0.22	11.5123	1533	928
2015-11-12 09:16:02	101	5285.19	96	5023.55	0.950495	0.5	26.1643	0.32	16.7452	1235	795
2015-11-12 09:34:02	105	5494.51	99	5180.53	0.942857	0.5	26.1643	0.18	9.41915	1441	886
2015-11-12 09:52:02	104	5442.18	100	5232.86	0.961538	0.5	26.1643	0.25	13.0822	1604	936
2015-11-12 10:10:02	119	6227.11	117	6122.45	0.983193	0.6	31.3972	0	0	673	270
2015-11-12 10:28:02	104	5442.18	105	5494.51	1.00962	0.5	26.1643	0.11	5.75615	1032	507
2015-11-12 10:44:02	93	4866.56	86	4500.26	0.924731	0.5	26.1643	0.01	0.523286	121	25
2015-11-12 11:02:02	92	4814.23	89	4657.25	0.967391	0.5	26.1643	0.02	1.04657	299	83
2015-11-12 11:20:02	97	5075.88	82	4290.95	0.845361	0.5	26.1643	0	0	27	6
2015-11-12 11:38:02	98	5128.21	86	4500.26	0.877551	0.5	26.1643	0.01	0.523286	122	30
2015-11-12 11:56:02	102	5337.52	95	4971.22	0.931373	0.5	26.1643	0.21	10.989	641	238
2015-11-12 12:12:02	107	5599.16	102	5337.52	0.953271	0.5	26.1643	0.35	18.315	1095	487
2015-11-12 12:30:02	101	5285.19	96	5023.55	0.950495	0.5	26.1643	0.3	15.6986	891	448
2015-11-12 12:48:02	105	5494.51	101	5285.19	0.961905	0.5	26.1643	0.11	5.75615	1268	537
2015-11-12 13:06:02	88	4604.92	80	4186.29	0.909091	0.4	20.9314	0	0	272	50
2015-11-12 13:24:02	83	4343.28	74	3872.32	0.891566	0.4	20.9314	0.01	0.523286	28	8
2015-11-12 13:40:02	92	4814.23	77	4029.3	0.836957	0.4	20.9314	0	0	43	26
2015-11-12 13:58:02	80	4186.29	68	3558.35	0.85	0.4	20.9314	0	0	220	43
2015-11-12 14:16:02	91	4761.9	73	3819.99	0.802198	0.4	20.9314	0	0	25	4
2015-11-12 14:34:02	88	4604.92	73	3819.99	0.829545	0.4	20.9314	0.01	0.523286	59	19
2015-11-12 14:52:02	102	5337.52	90	4709.58	0.882353	0.5	26.1643	0.28	14.652	675	105
2015-11-12 15:08:02	101	5285.19	95	4971.22	0.940594	0.5	26.1643	0.35	18.315	979	515
2015-11-12 15:26:02	101	5285.19	94	4918.89	0.930693	0.5	26.1643	0.29	15.1753	1247	647
2015-11-12 15:44:02	103	5389.85	97	5075.88	0.941748	0.5	26.1643	0.3	15.6986	1170	599
2015-11-12 16:02:02	96	5023.55	88	4604.92	0.916667	0.5	26.1643	0.01	0.523286	239	26
2015-11-12 16:20:02	95	4971.22	87	4552.59	0.915789	0.5	26.1643	0	0	282	54
2015-11-12 16:36:02	88	4604.92	76	3976.98	0.863636	0.4	20.9314	0	0	49	10
2015-11-12 16:54:02	92	4814.23	76	3976.98	0.826087	0.4	20.9314	0	0	85	14
2015-11-12 17:12:02	92	4814.23	73	3819.99	0.793478	0.4	20.9314	0.01	0.523286	89	20
2015-11-12 17:30:02	91	4761.9	72	3767.66	0.791209	0.4	20.9314	0.01	0.523286	24	4
2015-11-12 17:48:02	99	5180.53	88	4604.92	0.888889	0.5	26.1643	0.01	0.523286	492	120
2015-11-12 18:04:02	101	5285.19	87	4552.59	0.861386	0.5	26.1643	0.33	17.2684	824	336
2015-11-12 18:22:02	102	5337.52	94	4918.89	0.921569	0.5	26.1643	0.25	13.0822	1745	1040
2015-11-12 18:40:02	107	5599.16	99	5180.53	0.925234	0.5	26.1643	0.17	8.89587	1359	659
2015-11-12 18:58:02	92	4814.23	78	4081.63	0.847826	0.4	20.9314	0	0	196	17
2015-11-12 19:16:02	87	4552.59	74	3872.32	0.850575	0.4	20.9314	0.01	0.523286	57	10
2015-11-12 19:32:02	94	4918.89	76	3976.98	0.808511	0.5	26.1643	0	0	43	13
2015-11-12 19:50:02	96	5023.55	82	4290.95	0.854167	0.5	26.1643	0	0	110	26
2015-11-12 20:08:02	89	4657.25	71	3715.33	0.797753	0.4	20.9314	0	0	242	17
2015-11-12 20:26:02	101	5285.19	92	4814.23	0.910891	0.5	26.1643	0.34	17.7917	655	237
2015-11-12 20:44:02	105	5494.51	103	5389.85	0.980952	0.5	26.1643	0.42	21.978	1627	918
2015-11-12 21:00:02	104	5442.18	99	5180.53	0.951923	0.5	26.1643	0.22	11.5123	1584	981
2015-11-12 21:18:02	108	5651.49	104	5442.18	0.962963	0.5	26.1643	0.32	16.7452	1709	1027
2015-11-12 21:36:02	113	5913.13	107	5599.16	0.946903	0.6	31.3972	0.05	2.61643	1491	720
2015-11-12 21:54:02	111	5808.48	105	5494.51	0.945946	0.6	31.3972	0	0	1006	441
2015-11-12 22:12:02	84	4395.6	77	4029.3	0.916667	0.4	20.9314	0	0	70	21
2015-11-12 22:28:02	97	5075.88	82	4290.95	0.845361	0.5	26.1643	0	0	49	16
2015-11-12 22:46:02	95	4971.22	80	4186.29	0.842105	0.5	26.1643	0.01	0.523286	58	14
2015-11-12 23:04:02	85	4447.93	69	3610.68	0.811765	0.4	20.9314	0.01	0.523286	98	33
2015-11-12 23:22:02	92	4814.23	74	3872.32	0.804348	0.4	20.9314	0	0	24	11
2015-11-12 23:40:02	103	5389.85	92	4814.23	0.893204	0.5	26.1643	0.12	6.27943	793	389
2015-11-12 23:56:02	110	5756.15	106	5546.83	0.963636	0.5	26.1643	0.31	16.2219	1482	934
2015-11-13 00:14:02	108	5651.49	103	5389.85	0.953704	0.5	26.1643	0.32	16.7452	1449	742
2015-11-13 00:32:02	85	4447.93	78	4081.63	0.917647	0.4	20.9314	0	0	696	342
2015-11-13 00:50:02	89	4657.25	78	4081.63	0.876404	0.4	20.9314	0.01	0.523286	43	11
2015-11-13 01:08:02	95	4971.22	82	4290.95	0.863158	0.5	26.1643	0	0	80	24
2015-11-13 01:24:02	82	4290.95	70	3663	0.853659	0.4	20.9314	0.01	0.523286	49	9
2015-11-13 01:42:02	83	4343.28	65	3401.36	0.783133	0.4	20.9314	0	0	51	10
2015-11-13 02:00:02	94	4918.89	78	4081.63	0.829787	0.5	26.1643	0.02	1.04657	171	21
2015-11-13 02:18:02	87	4552.59	69	3610.68	0.793103	0.4	20.9314	0.01	0.523286	241	112
2015-11-13 02:36:02	81	4238.62	64	3349.03	0.790123	0.4	20.9314	0.01	0.523286	11	3
2015-11-13 02:52:02	85	4447.93	66	3453.69	0.776471	0.4	20.9314	0	0	88	42
2015-11-13 03:10:02	98	5128.21	83	4343.28	0.846939	0.5	26.1643	0.01	0.523286	269	40
2015-11-13 03:28:02	101	5285.19	84	4395.6	0.831683	0.5	26.1643	0.28	14.652	666	142
2015-11-13 03:46:02	99	5180.53	92	4814.23	0.929293	0.5	26.1643	0.21	10.989	1592	824
2015-11-13 04:04:02	88	4604.92	77	4029.3	0.875	0.4	20.9314	0	0	178	43
2015-11-13 04:20:02	88	4604.92	72	3767.66	0.818182	0.4	20.9314	0.01	0.523286	48	15
2015-11-13 04:38:02	81	4238.62	65	3401.36	0.802469	0.4	20.9314	0	0	35	11
2015-11-13 04:56:02	86	4500.26	67	3506.02	0.77907	0.4	20.9314	0.01	0.523286	26	8
2015-11-13 05:14:02	80	4186.29	62	3244.37	0.775	0.4	20.9314	0	0	93	24
2015-11-13 05:32:02	87	4552.59	68	3558.35	0.781609	0.4	20.9314	0.01	0.523286	20	8
2015-11-13 05:48:02	80	4186.29	61	3192.05	0.7625	0.4	20.9314	0.01	0.523286	150	21
2015-11-13 06:06:02	86	4500.26	67	3506.02	0.77907	0.4	20.9314	0.01	0.523286	51	23
2015-11-13 06:24:02	106	5546.83	85	4447.93	0.801887	0.5	26.1643	0.1	5.23286	491	127
2015-11-13 06:42:02	100	5232.86	91	4761.9	0.91	0.5	26.1643	0.46	24.0712	1627	1015
2015-11-13 07:00:02	76	3976.98	73	3819.99	0.960526	0.4	20.9314	0.16	8.37258	1404	800
2015-11-13 07:16:02	99	5180.53	93	4866.56	0.939394	0.5	26.1643	0.2	10.4657	438	177

## Sheet: p791
Subject ID	p791
Weight(g)	14.23	0.01423
Sex	Male
Diet	normal chow diet
Chamber Temperature: 220C
DATE/TIME	VO2		VCO2		RER	HEAT		FEED1		XTOT	XAMB
	ml/hr	ml/kg/hr	ml/hr	ml/kg/hr		kcal/hr	kcal/kg/hr	GRAMS	g/kg	COUNTS	COUNTS
2015-11-11 07:14:02	65	4567.81	60	4216.44	0.923077	0.3	21.0822	0	0	17	9
2015-11-11 07:32:02	62	4356.99	57	4005.62	0.919355	0.3	21.0822	0.01	0.702741	22	5
2015-11-11 07:50:02	62	4356.99	54	3794.8	0.870968	0.3	21.0822	0	0	57	5
2015-11-11 08:08:02	60	4216.44	52	3654.25	0.866667	0.3	21.0822	0.01	0.702741	41	16
2015-11-11 08:26:02	74	5200.28	69	4848.91	0.932432	0.4	28.1096	0.05	3.5137	215	60
2015-11-11 08:42:02	66	4638.09	63	4427.27	0.954545	0.3	21.0822	0.39	27.4069	727	407
2015-11-11 09:00:02	78	5481.38	77	5411.1	0.987179	0.4	28.1096	0.04	2.81096	587	211
2015-11-11 09:18:02	63	4427.27	57	4005.62	0.904762	0.3	21.0822	0	0	7	0
2015-11-11 09:36:02	62	4356.99	54	3794.8	0.870968	0.3	21.0822	0.01	0.702741	23	11
2015-11-11 09:54:02	69	4848.91	66	4638.09	0.956522	0.3	21.0822	0.21	14.7576	205	80
2015-11-11 10:10:02	72	5059.73	68	4778.64	0.944444	0.4	28.1096	0.33	23.1904	615	317
2015-11-11 10:28:02	68	4778.64	64	4497.54	0.941176	0.3	21.0822	0.31	21.785	541	262
2015-11-11 10:46:02	67	4708.36	63	4427.27	0.940299	0.3	21.0822	0.19	13.3521	690	309
2015-11-11 11:04:02	59	4146.17	57	4005.62	0.966102	0.3	21.0822	0.1	7.02741	287	86
2015-11-11 11:22:02	63	4427.27	62	4356.99	0.984127	0.3	21.0822	0.01	0.702741	10	1
2015-11-11 11:38:02	61	4286.72	58	4075.9	0.95082	0.3	21.0822	0.01	0.702741	20	9
2015-11-11 11:56:02	65	4567.81	62	4356.99	0.953846	0.3	21.0822	0.17	11.9466	506	224
2015-11-11 12:14:02	63	4427.27	61	4286.72	0.968254	0.3	21.0822	0.2	14.0548	509	253
2015-11-11 12:32:02	63	4427.27	61	4286.72	0.968254	0.3	21.0822	0.01	0.702741	3	0
2015-11-11 12:50:02	63	4427.27	60	4216.44	0.952381	0.3	21.0822	0.01	0.702741	35	10
2015-11-11 13:06:02	56	3935.35	50	3513.7	0.892857	0.3	21.0822	0	0	46	17
2015-11-11 13:24:02	55	3865.07	46	3232.61	0.836364	0.3	21.0822	0.01	0.702741	22	8
2015-11-11 13:42:02	70	4919.18	64	4497.54	0.914286	0.3	21.0822	0.16	11.2439	401	201
2015-11-11 14:00:02	60	4216.44	59	4146.17	0.983333	0.3	21.0822	0.14	9.83837	719	437
2015-11-11 14:18:02	74	5200.28	75	5270.56	1.01351	0.4	28.1096	0.21	14.7576	745	300
2015-11-11 14:34:02	66	4638.09	62	4356.99	0.939394	0.3	21.0822	0.01	0.702741	181	24
2015-11-11 14:52:02	68	4778.64	61	4286.72	0.897059	0.3	21.0822	0.01	0.702741	6	0
2015-11-11 15:10:02	64	4497.54	58	4075.9	0.90625	0.3	21.0822	0.01	0.702741	34	8
2015-11-11 15:28:02	65	4567.81	57	4005.62	0.876923	0.3	21.0822	0.01	0.702741	48	17
2015-11-11 15:46:02	66	4638.09	61	4286.72	0.924242	0.3	21.0822	0.16	11.2439	514	208
2015-11-11 16:02:02	80	5621.93	79	5551.65	0.9875	0.4	28.1096	0.23	16.163	653	250
2015-11-11 16:20:02	67	4708.36	60	4216.44	0.895522	0.3	21.0822	0.01	0.702741	227	42
2015-11-11 16:38:02	68	4778.64	59	4146.17	0.867647	0.3	21.0822	0.01	0.702741	35	6
2015-11-11 16:56:02	68	4778.64	57	4005.62	0.838235	0.3	21.0822	0.02	1.40548	19	5
2015-11-11 17:14:02	64	4497.54	54	3794.8	0.84375	0.3	21.0822	0.01	0.702741	26	6
2015-11-11 17:30:02	64	4497.54	54	3794.8	0.84375	0.3	21.0822	0.01	0.702741	274	90
2015-11-11 17:48:02	69	4848.91	53	3724.53	0.768116	0.3	21.0822	0.01	0.702741	15	3
2015-11-11 18:06:02	66	4638.09	52	3654.25	0.787879	0.3	21.0822	0.01	0.702741	72	24
2015-11-11 18:24:02	75	5270.56	62	4356.99	0.826667	0.4	28.1096	0.2	14.0548	584	231
2015-11-11 18:42:02	79	5551.65	74	5200.28	0.936709	0.4	28.1096	0.23	16.163	1667	1045
2015-11-11 18:58:02	79	5551.65	75	5270.56	0.949367	0.4	28.1096	0.23	16.163	674	341
2015-11-11 19:16:02	71	4989.46	62	4356.99	0.873239	0.3	21.0822	0	0	217	64
2015-11-11 19:34:02	77	5411.1	66	4638.09	0.857143	0.4	28.1096	0	0	30	4
2015-11-11 19:52:02	73	5130.01	64	4497.54	0.876712	0.4	28.1096	0.01	0.702741	70	14
2015-11-11 20:10:02	80	5621.93	78	5481.38	0.975	0.4	28.1096	0.22	15.4603	863	433
2015-11-11 20:26:02	80	5621.93	75	5270.56	0.9375	0.4	28.1096	0.24	16.8658	1167	715
2015-11-11 20:44:02	94	6605.76	88	6184.12	0.93617	0.5	35.137	0.17	11.9466	1446	868
2015-11-11 21:02:02	91	6394.94	90	6324.67	0.989011	0.5	35.137	0.25	17.5685	918	500
2015-11-11 21:20:02	85	5973.3	83	5832.75	0.976471	0.4	28.1096	0.18	12.6493	1258	744
2015-11-11 21:38:02	82	5762.47	81	5692.2	0.987805	0.4	28.1096	0.2	14.0548	1024	554
2015-11-11 21:54:02	78	5481.38	74	5200.28	0.948718	0.4	28.1096	0.2	14.0548	673	359
2015-11-11 22:12:02	83	5832.75	79	5551.65	0.951807	0.4	28.1096	0.11	7.73015	1323	752
2015-11-11 22:30:02	94	6605.76	91	6394.94	0.968085	0.5	35.137	0.21	14.7576	1154	663
2015-11-11 22:48:02	75	5270.56	71	4989.46	0.946667	0.4	28.1096	0.2	14.0548	1350	850
2015-11-11 23:06:02	86	6043.57	83	5832.75	0.965116	0.4	28.1096	0.09	6.32467	1320	725
2015-11-11 23:22:02	90	6324.67	86	6043.57	0.955556	0.4	28.1096	0.19	13.3521	857	452
2015-11-11 23:40:02	86	6043.57	80	5621.93	0.930233	0.4	28.1096	0.16	11.2439	1665	1047
2015-11-11 23:58:02	79	5551.65	74	5200.28	0.936709	0.4	28.1096	0.01	0.702741	215	35
2015-11-12 00:16:02	89	6254.39	82	5762.47	0.921348	0.4	28.1096	0	0	90	19
2015-11-12 00:34:02	84	5903.02	85	5973.3	1.0119	0.4	28.1096	0.03	2.10822	384	146
2015-11-12 00:50:02	87	6113.84	86	6043.57	0.988506	0.4	28.1096	0.27	18.974	652	284
2015-11-12 01:08:02	86	6043.57	78	5481.38	0.906977	0.4	28.1096	0	0	221	58
2015-11-12 01:26:02	90	6324.67	80	5621.93	0.888889	0.4	28.1096	0	0	115	17
2015-11-12 01:44:02	82	5762.47	76	5340.83	0.926829	0.4	28.1096	0.06	4.21644	195	80
2015-11-12 02:02:02	85	5973.3	85	5973.3	1	0.4	28.1096	0.19	13.3521	834	421
2015-11-12 02:18:02	84	5903.02	81	5692.2	0.964286	0.4	28.1096	0.26	18.2713	612	282
2015-11-12 02:36:02	75	5270.56	66	4638.09	0.88	0.4	28.1096	0	0	220	31
2015-11-12 02:54:02	78	5481.38	65	4567.81	0.833333	0.4	28.1096	0.01	0.702741	43	13
2015-11-12 03:12:02	78	5481.38	62	4356.99	0.794872	0.4	28.1096	0	0	67	2
2015-11-12 03:30:02	71	4989.46	58	4075.9	0.816901	0.3	21.0822	0.01	0.702741	38	16
2015-11-12 03:46:02	75	5270.56	59	4146.17	0.786667	0.4	28.1096	0	0	34	12
2015-11-12 04:04:02	81	5692.2	60	4216.44	0.740741	0.4	28.1096	0.01	0.702741	150	26
2015-11-12 04:22:02	76	5340.83	56	3935.35	0.736842	0.4	28.1096	0.01	0.702741	17	0
2015-11-12 04:40:02	78	5481.38	58	4075.9	0.74359	0.4	28.1096	0.01	0.702741	105	40
2015-11-12 04:58:02	76	5340.83	70	4919.18	0.921053	0.4	28.1096	0.24	16.8658	940	442
2015-11-12 05:14:02	82	5762.47	75	5270.56	0.914634	0.4	28.1096	0.14	9.83837	1232	735
2015-11-12 05:32:02	83	5832.75	75	5270.56	0.903614	0.4	28.1096	0.29	20.3795	914	482
2015-11-12 05:50:02	88	6184.12	86	6043.57	0.977273	0.4	28.1096	0.18	12.6493	937	486
2015-11-12 06:08:02	74	5200.28	67	4708.36	0.905405	0.4	28.1096	0.01	0.702741	226	53
2015-11-12 06:26:02	72	5059.73	62	4356.99	0.861111	0.4	28.1096	0.01	0.702741	29	11
2015-11-12 06:42:02	71	4989.46	59	4146.17	0.830986	0.3	21.0822	0	0	36	14
2015-11-12 07:00:02	69	4848.91	55	3865.07	0.797101	0.3	21.0822	0.01	0.702741	31	8
2015-11-12 07:18:02	67	4708.36	55	3865.07	0.820896	0.3	21.0822	0.01	0.702741	70	26
2015-11-12 07:36:02	69	4848.91	53	3724.53	0.768116	0.3	21.0822	0.02	1.40548	63	33
2015-11-12 07:54:02	62	4356.99	50	3513.7	0.806452	0.3	21.0822	0.01	0.702741	28	4
2015-11-12 08:10:02	67	4708.36	51	3583.98	0.761194	0.3	21.0822	0.01	0.702741	29	12
2015-11-12 08:28:02	83	5832.75	66	4638.09	0.795181	0.4	28.1096	0.04	2.81096	277	59
2015-11-12 08:46:02	75	5270.56	70	4919.18	0.933333	0.4	28.1096	0.29	20.3795	747	398
2015-11-12 09:04:02	76	5340.83	71	4989.46	0.934211	0.4	28.1096	0.02	1.40548	700	257
2015-11-12 09:22:02	66	4638.09	54	3794.8	0.818182	0.3	21.0822	0.01	0.702741	8	2
2015-11-12 09:38:02	67	4708.36	52	3654.25	0.776119	0.3	21.0822	0.01	0.702741	21	2
2015-11-12 09:56:02	66	4638.09	51	3583.98	0.772727	0.3	21.0822	0	0	29	8
2015-11-12 10:14:02	67	4708.36	54	3794.8	0.80597	0.3	21.0822	0	0	22	8
2015-11-12 10:32:02	67	4708.36	59	4146.17	0.880597	0.3	21.0822	0.21	14.7576	552	296
2015-11-12 10:50:02	62	4356.99	60	4216.44	0.967742	0.3	21.0822	0.11	7.73015	249	101
2015-11-12 11:06:02	64	4497.54	56	3935.35	0.875	0.3	21.0822	0.01	0.702741	20	5
2015-11-12 11:24:02	70	4919.18	58	4075.9	0.828571	0.3	21.0822	0.01	0.702741	40	21
2015-11-12 11:42:02	63	4427.27	54	3794.8	0.857143	0.3	21.0822	0	0	34	15
2015-11-12 12:00:02	72	5059.73	67	4708.36	0.930556	0.4	28.1096	0.27	18.974	363	165
2015-11-12 12:18:02	79	5551.65	78	5481.38	0.987342	0.4	28.1096	0.09	6.32467	642	207
2015-11-12 12:34:02	67	4708.36	58	4075.9	0.865672	0.3	21.0822	0.01	0.702741	97	25
2015-11-12 12:52:02	70	4919.18	55	3865.07	0.785714	0.3	21.0822	0	0	28	3
2015-11-12 13:10:02	64	4497.54	52	3654.25	0.8125	0.3	21.0822	0.01	0.702741	24	7
2015-11-12 13:28:02	65	4567.81	52	3654.25	0.8	0.3	21.0822	0.01	0.702741	62	18
2015-11-12 13:46:02	64	4497.54	51	3583.98	0.796875	0.3	21.0822	0	0	127	20
2015-11-12 14:02:02	80	5621.93	67	4708.36	0.8375	0.4	28.1096	0.04	2.81096	240	63
2015-11-12 14:20:02	78	5481.38	73	5130.01	0.935897	0.4	28.1096	0.39	27.4069	717	350
2015-11-12 14:38:02	72	5059.73	62	4356.99	0.861111	0.3	21.0822	0	0	157	41
2015-11-12 14:56:02	65	4567.81	56	3935.35	0.861538	0.3	21.0822	0.01	0.702741	87	32
2015-11-12 15:14:02	64	4497.54	53	3724.53	0.828125	0.3	21.0822	0	0	26	8
2015-11-12 15:30:02	66	4638.09	51	3583.98	0.772727	0.3	21.0822	0.01	0.702741	18	6
2015-11-12 15:48:02	59	4146.17	48	3373.16	0.813559	0.3	21.0822	0.01	0.702741	178	23
2015-11-12 16:06:02	68	4778.64	52	3654.25	0.764706	0.3	21.0822	0	0	24	2
2015-11-12 16:24:02	74	5200.28	61	4286.72	0.824324	0.4	28.1096	0.12	8.43289	246	85
2015-11-12 16:42:02	68	4778.64	62	4356.99	0.911765	0.3	21.0822	0.2	14.0548	667	205
2015-11-12 16:58:02	80	5621.93	76	5340.83	0.95	0.4	28.1096	0.17	11.9466	603	251
2015-11-12 17:16:02	66	4638.09	56	3935.35	0.848485	0.3	21.0822	0.01	0.702741	258	46
2015-11-12 17:34:02	70	4919.18	55	3865.07	0.785714	0.3	21.0822	0	0	23	11
2015-11-12 17:52:02	65	4567.81	56	3935.35	0.861538	0.3	21.0822	0.01	0.702741	123	29
2015-11-12 18:10:02	73	5130.01	68	4778.64	0.931507	0.4	28.1096	0.26	18.2713	875	417
2015-11-12 18:26:02	80	5621.93	77	5411.1	0.9625	0.4	28.1096	0.28	19.6767	1136	675
2015-11-12 18:44:02	72	5059.73	65	4567.81	0.902778	0.4	28.1096	0.03	2.10822	235	65
2015-11-12 19:02:02	94	6605.76	88	6184.12	0.93617	0.5	35.137	0	0	428	83
2015-11-12 19:20:02	81	5692.2	76	5340.83	0.938272	0.4	28.1096	0.49	34.4343	776	409
2015-11-12 19:38:02	81	5692.2	80	5621.93	0.987654	0.4	28.1096	0.26	18.2713	1701	1115
2015-11-12 19:54:02	72	5059.73	67	4708.36	0.930556	0.4	28.1096	0.03	2.10822	511	182
2015-11-12 20:12:02	79	5551.65	69	4848.91	0.873418	0.4	28.1096	0	0	16	2
2015-11-12 20:30:02	85	5973.3	78	5481.38	0.917647	0.4	28.1096	0.17	11.9466	544	207
2015-11-12 20:48:02	84	5903.02	83	5832.75	0.988095	0.4	28.1096	0.37	26.0014	1222	742
2015-11-12 21:06:02	68	4778.64	67	4708.36	0.985294	0.3	21.0822	0.16	11.2439	499	216
2015-11-12 21:22:02	88	6184.12	81	5692.2	0.920455	0.4	28.1096	0	0	88	25
2015-11-12 21:40:02	84	5903.02	80	5621.93	0.952381	0.4	28.1096	0.31	21.785	686	299
2015-11-12 21:58:02	89	6254.39	85	5973.3	0.955056	0.4	28.1096	0.28	19.6767	1225	752
2015-11-12 22:16:02	87	6113.84	85	5973.3	0.977011	0.4	28.1096	0.31	21.785	705	389
2015-11-12 22:34:02	88	6184.12	86	6043.57	0.977273	0.4	28.1096	0.39	27.4069	927	546
2015-11-12 22:50:02	86	6043.57	82	5762.47	0.953488	0.4	28.1096	0.12	8.43289	567	226
2015-11-12 23:08:02	84	5903.02	81	5692.2	0.964286	0.4	28.1096	0	0	140	29
2015-11-12 23:26:02	88	6184.12	84	5903.02	0.954545	0.4	28.1096	0.5	35.137	627	315
2015-11-12 23:44:02	88	6184.12	86	6043.57	0.977273	0.4	28.1096	0.34	23.8932	1717	1148
2015-11-13 00:02:02	90	6324.67	91	6394.94	1.01111	0.5	35.137	0.39	27.4069	775	395
2015-11-13 00:18:02	87	6113.84	84	5903.02	0.965517	0.4	28.1096	0.23	16.163	1009	585
2015-11-13 00:36:02	83	5832.75	77	5411.1	0.927711	0.4	28.1096	0.36	25.2987	610	292
2015-11-13 00:54:02	89	6254.39	86	6043.57	0.966292	0.4	28.1096	0.33	23.1904	1450	899
2015-11-13 01:12:02	88	6184.12	84	5903.02	0.954545	0.4	28.1096	0.35	24.5959	995	459
2015-11-13 01:30:02	92	6465.21	92	6465.21	1	0.5	35.137	0.25	17.5685	832	412
2015-11-13 01:46:02	93	6535.49	89	6254.39	0.956989	0.5	35.137	0.1	7.02741	621	275
2015-11-13 02:04:02	85	5973.3	79	5551.65	0.929412	0.4	28.1096	0	0	98	6
2015-11-13 02:22:02	81	5692.2	74	5200.28	0.91358	0.4	28.1096	0.01	0.702741	26	5
2015-11-13 02:40:02	83	5832.75	76	5340.83	0.915663	0.4	28.1096	0.01	0.702741	47	20
2015-11-13 02:58:02	69	4848.91	64	4497.54	0.927536	0.3	21.0822	0	0	97	13
2015-11-13 03:14:02	78	5481.38	65	4567.81	0.833333	0.4	28.1096	0.01	0.702741	105	17
2015-11-13 03:32:02	88	6184.12	77	5411.1	0.875	0.4	28.1096	0.05	3.5137	331	183
2015-11-13 03:50:02	88	6184.12	82	5762.47	0.931818	0.4	28.1096	0.34	23.8932	909	508
2015-11-13 04:08:02	83	5832.75	69	4848.91	0.831325	0.4	28.1096	0	0	201	63
2015-11-13 04:26:02	72	5059.73	58	4075.9	0.805556	0.3	21.0822	0.01	0.702741	20	6
2015-11-13 04:42:02	75	5270.56	56	3935.35	0.746667	0.4	28.1096	0.01	0.702741	4	1
2015-11-13 05:00:02	75	5270.56	56	3935.35	0.746667	0.4	28.1096	0	0	37	11
2015-11-13 05:18:02	76	5340.83	58	4075.9	0.763158	0.4	28.1096	0.01	0.702741	104	34
2015-11-13 05:36:02	81	5692.2	61	4286.72	0.753086	0.4	28.1096	0.01	0.702741	31	11
2015-11-13 05:54:02	76	5340.83	59	4146.17	0.776316	0.4	28.1096	0.01	0.702741	73	10
2015-11-13 06:10:02	77	5411.1	57	4005.62	0.74026	0.4	28.1096	0.01	0.702741	41	7
2015-11-13 06:28:02	93	6535.49	74	5200.28	0.795699	0.4	28.1096	0.01	0.702741	296	56
2015-11-13 06:46:02	86	6043.57	75	5270.56	0.872093	0.4	28.1096	0.31	21.785	617	251
2015-11-13 07:04:02	78	5481.38	72	5059.73	0.923077	0.4	28.1096	0.34	23.8932	1135	619
2015-11-13 07:22:02	70	4919.18	64	4497.54	0.914286	0.3	21.0822	0.04	2.81096	281	100
